# Supplementary material
Source: publisher site journal article supplement (https://www.dovepress.com/article/96341)
Supplement: Supplementary file 1 [file get_supplementary_file.php]

| <b>Up-regulated Gene</b> |                         | <b>Down-regulated Gene</b> |                         |
|--------------------------|-------------------------|----------------------------|-------------------------|
| <b>Gene Symbol</b>       | <b>Log2 Fold Change</b> | <b>Gene Symbol</b>         | <b>Log2 Fold Change</b> |
| MT4                      | 5.856848545             | PLIN4                      | -6.363007278            |
| SERPINB2                 | 5.608260601             | PCSK9                      | -4.047192668            |
| PTGS2                    | 5.165994115             | TMPRSS4                    | -3.903321609            |
| SAA1                     | 4.834683884             | SPRY1                      | -3.553648733            |
| TPPP3                    | 4.702866376             | TGM2                       | -3.478009955            |
| FN1                      | 4.625770092             | ELF5                       | -3.049661503            |
| KRT17                    | 4.579989588             | ETV4                       | -2.985863187            |
| SEMA5A                   | 4.041063843             | MILR1                      | -2.779381215            |
| SERPINE1                 | 4.037605077             | HMGA2                      | -2.743238156            |
| DCLK1                    | 4.018308863             | AKR1B10                    | -2.698720976            |
| ALPP                     | 3.997077457             | S100A9                     | -2.681487505            |
| EPSTI1                   | 3.958919799             | MND1                       | -2.661054921            |
| INHA                     | 3.931834577             | CAPN8                      | -2.648464882            |
| DCLK2                    | 3.841516623             | SCD                        | -2.629485761            |
| IFI6                     | 3.786939797             | BUB1                       | -2.590230646            |
| DUSP1                    | 3.672447965             | CDCA7                      | -2.579563534            |
| OLR1                     | 3.60000575              | VSNL1                      | -2.56614365             |
| CCL5                     | 3.548273195             | KIAA0101                   | -2.533061487            |
| IFI44L                   | 3.546786896             | ETV5                       | -2.515154166            |
| MFAP5                    | 3.501953134             | C3                         | -2.485595421            |
| FAM198B                  | 3.447426645             | ABCC3                      | -2.457030672            |
| SAA2                     | 3.439625084             | C9orf47                    | -2.437336508            |
| TNNT2                    | 3.429837549             | GINS2                      | -2.402927437            |
| SMIM5                    | 3.402580024             | TRIB3                      | -2.362208659            |
| ID3                      | 3.360977929             | DUSP4                      | -2.338011544            |
| PSG5                     | 3.334317913             | AGR2                       | -2.316430085            |
| ATF3                     | 3.305344445             | ALDH1A1                    | -2.310272301            |

|          |             |          |              |
|----------|-------------|----------|--------------|
| INHBA    | 3.273859024 | SLCO4C1  | -2.304568614 |
| CPA4     | 3.201942258 | CTNNAL1  | -2.294956084 |
| KRT4     | 3.180134737 | PHLDA1   | -2.246447165 |
| C8orf4   | 3.173604678 | NDC80    | -2.175541453 |
| IGFBP3   | 3.157345136 | ALDOC    | -2.134695924 |
| DUSP22   | 3.128918276 | CSMD2    | -2.122957685 |
| AQP3     | 3.116295806 | ACAT2    | -2.11976219  |
| GPR176   | 3.098864885 | RNF157   | -2.105790995 |
| COL16A1  | 3.09519858  | SKAP1    | -2.101012258 |
| EPB41L5  | 3.078520275 | CDKN2C   | -2.092650315 |
| SLC7A7   | 3.076151528 | CENPH    | -2.084085238 |
| PPBP     | 3.058465372 | HMGB2    | -2.08262771  |
| KRTAP2-3 | 3.031961113 | DDIT4    | -2.080148877 |
| GALNT9   | 3.024296801 | NEK2     | -2.069986467 |
| HSPB8    | 3.011135732 | GJA5     | -2.067041756 |
| KCNB1    | 2.989075571 | DEPDC1B  | -2.066901908 |
| EDN1     | 2.978462817 | CEACAM5  | -2.063598364 |
| TNFRSF9  | 2.943478187 | POLE2    | -2.058225283 |
| FAM134B  | 2.913879267 | TIMP4    | -2.030717764 |
| CCDC80   | 2.901333325 | RAD51AP1 | -2.026078561 |
| TNFAIP3  | 2.896598523 | RRM2     | -2.018187604 |
| NEURL3   | 2.847984084 | GPR20    | -1.992722191 |
| TNFRSF19 | 2.82505635  | ERICH1   | -1.974859281 |
| KRT16    | 2.811616524 | SPC25    | -1.974194498 |
| CYR61    | 2.809904128 | GSDMC    | -1.961575527 |
| MX2      | 2.797086842 | DTL      | -1.951749265 |
| FSTL3    | 2.77433585  | TMEM97   | -1.935739407 |
| OXTR     | 2.765074167 | CELA3B   | -1.934346711 |
| OTUD1    | 2.73466517  | CDK1     | -1.924259638 |
| WNT6     | 2.721521126 | MSMO1    | -1.923845571 |

|          |             |              |              |
|----------|-------------|--------------|--------------|
| CFB      | 2.713339671 | IDI1         | -1.921787866 |
| IFIT1    | 2.697630559 | FAM64A       | -1.910714628 |
| COL5A1   | 2.692995885 | MELK         | -1.906566333 |
| IL32     | 2.683661645 | PRIM1        | -1.903067278 |
| AHNAK2   | 2.681988898 | INSIG1       | -1.892699844 |
| CDKN1C   | 2.679652112 | CBR3         | -1.891313492 |
| BIRC3    | 2.677232247 | CENPK        | -1.88858494  |
| OLFML2A  | 2.66603172  | MALL         | -1.883948695 |
| HEG1     | 2.618067063 | GALNTL4      | -1.878943344 |
| UBD      | 2.567702563 | MCM6         | -1.866885026 |
| C15orf56 | 2.553642792 | HSD17B7      | -1.864285398 |
| DDX60L   | 2.549042356 | ACSL1        | -1.862667941 |
| MUC1     | 2.522785115 | BRIP1        | -1.860191245 |
| TGFB2    | 2.52183715  | BIRC5        | -1.860145047 |
| TAC3     | 2.515429738 | HMMR         | -1.839288581 |
| MFI2     | 2.514520933 | LOC100128130 | -1.823675235 |
| DKK1     | 2.508540929 | ORC1         | -1.817536006 |
| XAF1     | 2.504717521 | CCNA2        | -1.816103122 |
| PDLIM4   | 2.504339099 | EGR1         | -1.807291022 |
| ISG15    | 2.500098027 | ACSS2        | -1.80512321  |
| TLR2     | 2.498034718 | CDCA5        | -1.79898615  |
| LAMA3    | 2.485630567 | GDF15        | -1.798283935 |
| RELB     | 2.470445    | PHGDH        | -1.788535671 |
| C1S      | 2.442716008 | SPRED2       | -1.78777913  |
| OASL     | 2.439849914 | CDC25C       | -1.779969486 |
| PON3     | 2.434613861 | FAM72A       | -1.774001964 |
| NLRP7    | 2.414093572 | NT5E         | -1.77001598  |
| WDR66    | 2.411080875 | GMNN         | -1.767088697 |
| BATF2    | 2.407328683 | PBK          | -1.767000137 |
| TUBA1A   | 2.400743473 | MESP1        | -1.764511502 |

|          |             |         |              |
|----------|-------------|---------|--------------|
| PDZK1IP1 | 2.400280152 | MCM5    | -1.76322775  |
| CDR2L    | 2.389616969 | G0S2    | -1.753011479 |
| LIMS2    | 2.388089959 | CCNB2   | -1.751026922 |
| RTP4     | 2.379751858 | PPARG   | -1.749146256 |
| LTB      | 2.379128388 | DEPDC1  | -1.748723738 |
| PKDCC    | 2.367797695 | SSPN    | -1.74592618  |
| VASN     | 2.363732601 | LGALS1  | -1.737646831 |
| NKAIN4   | 2.350901123 | PCDHGC3 | -1.722146191 |
| FAT4     | 2.336340929 | MCM10   | -1.721768662 |
| IL23A    | 2.33498111  | HELLS   | -1.72099086  |
| ACE2     | 2.334227625 | GLIS1   | -1.719863203 |
| TMEM52B  | 2.325021235 | ESX1    | -1.719681359 |
| C7orf29  | 2.312673719 | ASNS    | -1.717331833 |
| FSTL1    | 2.307479023 | IRAK3   | -1.715970293 |
| IGFBP1   | 2.297912743 | ZKSCAN7 | -1.707645957 |
| DRAM1    | 2.293582819 | FANCI   | -1.707199124 |
| FBN1     | 2.289809263 | LMNB1   | -1.696974815 |
| SLC31A2  | 2.288180546 | MN1     | -1.687464129 |
| DEGS1    | 2.268643012 | PSAT1   | -1.68026343  |
| MB21D2   | 2.262486007 | CCNE2   | -1.678050165 |
| SLC7A5   | 2.253755948 | CENPW   | -1.675776249 |
| FILIP1L  | 2.245524691 | POLM    | -1.674772947 |
| LBH      | 2.23986916  | ASPH    | -1.672948914 |
| PTRF     | 2.238860197 | EXO1    | -1.671942713 |
| PHLDB2   | 2.231613739 | LYRM1   | -1.671088556 |
| RRAD     | 2.227500128 | CDCA3   | -1.658769337 |
| FAM49A   | 2.206068286 | CCNG1   | -1.656779293 |
| TIMP2    | 2.204287132 | ZWINT   | -1.631406674 |
| PI3      | 2.2002638   | LPAR1   | -1.629867267 |
| IGFBP5   | 2.18945627  | CDC6    | -1.625075658 |

|            |             |          |              |
|------------|-------------|----------|--------------|
| HPSE       | 2.188070884 | MAATS1   | -1.624834856 |
| CD24       | 2.181447979 | CMBL     | -1.616033607 |
| HES2       | 2.175913315 | NCAPH    | -1.611020208 |
| PLA2G4A    | 2.172485662 | S100A2   | -1.607435896 |
| CYB5R1     | 2.163385914 | CEP55    | -1.60547525  |
| RASSF2     | 2.162470642 | CDC45    | -1.601366771 |
| GBP4       | 2.146632922 | SGOL1    | -1.595492759 |
| PLGLB1     | 2.145712282 | RFX7     | -1.594214787 |
| MAMDC2     | 2.128142537 | OIP5     | -1.593950184 |
| CDKN2B-AS1 | 2.127938518 | TOP2A    | -1.588924116 |
| SOGA2      | 2.127457771 | TYMS     | -1.586440987 |
| KRT6A      | 2.122425119 | EBP      | -1.581155794 |
| LOXL4      | 2.121325194 | TRIB2    | -1.579235284 |
| AIM1L      | 2.117795406 | MIR205HG | -1.576599025 |
| ZNF365     | 2.101614929 | MT2A     | -1.576211538 |
| GADD45A    | 2.099759319 | ACP6     | -1.572727943 |
| DAPK1      | 2.096534377 | PCDH20   | -1.571330234 |
| STX11      | 2.092017543 | PECAM1   | -1.570472121 |
| ZG16       | 2.082026449 | PLK4     | -1.565599857 |
| EXPH5      | 2.06337087  | TTK      | -1.5623189   |
| CLIC5      | 2.062350874 | MT1A     | -1.560940971 |
| KIAA0513   | 2.060243745 | FAM83D   | -1.559692372 |
| TMEM140    | 2.052283678 | USP13    | -1.555506115 |
| GATA6      | 2.049690105 | UBE2T    | -1.553318824 |
| BDNF       | 2.049095542 | NUSAP1   | -1.552621572 |
| CD55       | 2.046739837 | HMGA1    | -1.550190791 |
| ANXA8      | 2.016551509 | BCL2L14  | -1.549719078 |
| VLDLR      | 2.013592891 | MVK      | -1.548937003 |
| SCD5       | 2.005403374 | METTTL7A | -1.547295676 |
| EVPLL      | 2.004103656 | PRSS1    | -1.543737661 |

|          |             |          |              |
|----------|-------------|----------|--------------|
| MSLN     | 1.990735315 | TOX2     | -1.541041701 |
| SPANXD   | 1.988128499 | SKA3     | -1.538807187 |
| SYNPO    | 1.988086478 | SHMT1    | -1.515599546 |
| EVA1C    | 1.985203098 | TK1      | -1.515520179 |
| ACAP1    | 1.975040629 | OBFC1    | -1.511992883 |
| HECW2    | 1.963220856 | NUDT4P1  | -1.508701627 |
| SEMA7A   | 1.961062561 | CENPI    | -1.507644316 |
| PLAUR    | 1.958691497 | GSTO2    | -1.50142052  |
| PTGIS    | 1.953207921 | HSCB     | -1.500614679 |
| AOX1     | 1.953132519 | TMEM156  | -1.498814536 |
| GAB2     | 1.953088807 | CDKN3    | -1.487182959 |
| TMEM255A | 1.950602535 | SPRY2    | -1.48545702  |
| GPR1     | 1.947396049 | DLEU1    | -1.484321286 |
| ARSI     | 1.946452623 | SHCBP1   | -1.482221032 |
| CRISPLD2 | 1.946230036 | TUBE1    | -1.480274595 |
| MOB3B    | 1.943649186 | LSS      | -1.477779694 |
| MX1      | 1.935607072 | SQLE     | -1.474615954 |
| SPANXB1  | 1.935515049 | CABYR    | -1.473278072 |
| NMU      | 1.928164228 | GNG4     | -1.470202771 |
| ZNFX1    | 1.916790134 | CENPM    | -1.469781137 |
| ANKRD33B | 1.916637089 | MOCOS    | -1.469418633 |
| OAS3     | 1.914080323 | CHEK1    | -1.454908468 |
| WNT11    | 1.912586026 | CALB2    | -1.453072586 |
| SYNGR3   | 1.910394998 | LRP8     | -1.448189519 |
| CHST3    | 1.907648143 | PCNA     | -1.445631943 |
| ADAMTS6  | 1.903393037 | APOC1    | -1.443604964 |
| SRCRB4D  | 1.899866429 | CYP51A1  | -1.442082963 |
| NFKBIZ   | 1.88185217  | DLGAP5   | -1.434698069 |
| DENND3   | 1.880630527 | TMEM37   | -1.434154102 |
| ID4      | 1.873909181 | HIST1H3J | -1.429404291 |

|           |             |              |              |
|-----------|-------------|--------------|--------------|
| H19       | 1.873404478 | KLHL2        | -1.428961627 |
| KLK7      | 1.870565241 | UBALD2       | -1.424924361 |
| CDA       | 1.869811986 | CCK          | -1.424688098 |
| FRAS1     | 1.865450869 | TMEM71       | -1.423981138 |
| PDZK1     | 1.860628894 | MAD2L1       | -1.415015476 |
| RGS9      | 1.860504244 | F2RL2        | -1.414159922 |
| TUFT1     | 1.860454202 | ID1          | -1.412152671 |
| CDC42EP3  | 1.856574734 | RFC4         | -1.409884525 |
| AKAP12    | 1.856314662 | AURKB        | -1.407277386 |
| LAMB3     | 1.847731831 | LOC100507855 | -1.399846363 |
| IFITM1    | 1.845655396 | CDT1         | -1.39885809  |
| GJA1      | 1.841685219 | DDB2         | -1.392502382 |
| OSBP2     | 1.835856827 | ASPM         | -1.386142845 |
| TAGLN     | 1.833528318 | DUT          | -1.385570209 |
| KLHL29    | 1.832738478 | OSBPL3       | -1.384881358 |
| DSC2      | 1.829375962 | AGPAT9       | -1.383883389 |
| RASSF1    | 1.823906807 | KIFC1        | -1.383401885 |
| TRIB1     | 1.820887245 | RFC5         | -1.381763007 |
| TNFRSF11B | 1.818194504 | C3orf33      | -1.379158314 |
| TLR1      | 1.816683964 | FDPS         | -1.377413947 |
| MFAP3L    | 1.816248691 | DONSON       | -1.376756467 |
| GPRC5A    | 1.813808491 | BAIAP2L1     | -1.375803509 |
| WNT10A    | 1.813574282 | PLAU         | -1.375276691 |
| DGAT2     | 1.804248148 | DHCR7        | -1.374781983 |
| ZFP36L2   | 1.802464344 | CENPA        | -1.37378798  |
| ALDH1A2   | 1.799846167 | HES1         | -1.373513158 |
| ICAM1     | 1.797211214 | BLM          | -1.359440455 |
| MYD88     | 1.795430522 | LAMA4        | -1.358323278 |
| ISG20     | 1.795248611 | DTYMK        | -1.354250845 |
| IFITM2    | 1.793027278 | SLC50A1      | -1.353211023 |

|          |             |           |              |
|----------|-------------|-----------|--------------|
| GNPTAB   | 1.789491832 | CEACAM6   | -1.3523081   |
| SLC9A9   | 1.788739007 | SKA1      | -1.350629154 |
| GSN      | 1.788338546 | GALR2     | -1.34564787  |
| SAMD9    | 1.786488066 | TMEM135   | -1.345477285 |
| MITF     | 1.785338026 | THG1L     | -1.344109759 |
| MFSD12   | 1.785177328 | KIF11     | -1.342337613 |
| KANK4    | 1.783137545 | SLC25A21  | -1.338474657 |
| GATA3    | 1.78198982  | GNE       | -1.336974435 |
| PCDHB2   | 1.78197565  | FDFT1     | -1.335184175 |
| IL1RN    | 1.780613964 | P2RX5     | -1.333611192 |
| TMEM165  | 1.777058269 | NGF       | -1.331699761 |
| GGTA1P   | 1.770143534 | DPCD      | -1.328241045 |
| SLCO3A1  | 1.766423136 | ITGB3BP   | -1.327963012 |
| CDKN2B   | 1.765314803 | RHNO1     | -1.326267461 |
| SLC17A5  | 1.758917322 | GNG11     | -1.321992726 |
| DAGLB    | 1.757452902 | ESPL1     | -1.311029385 |
| CPEB2    | 1.749734716 | BLVRA     | -1.306459723 |
| SH3PXD2B | 1.747486737 | BARD1     | -1.305899474 |
| STAT2    | 1.739522345 | LIN9      | -1.304505692 |
| BMP1     | 1.736977127 | CMSS1     | -1.303701026 |
| MYH15    | 1.723008131 | COL9A2    | -1.283519609 |
| A4GALT   | 1.722677837 | TSPAN2    | -1.281340884 |
| TLE1     | 1.717084129 | TROAP     | -1.281086194 |
| IL4I1    | 1.711705688 | GTSE1     | -1.280299176 |
| AGR3     | 1.710826427 | ELOVL6    | -1.278294632 |
| ZNF385B  | 1.710141319 | ANP32AP1  | -1.275852782 |
| AP4E1    | 1.707332082 | RAD51     | -1.275712612 |
| EDN2     | 1.705936334 | TCAM1P    | -1.275186062 |
| SPANXC   | 1.7049666   | ARHGAP11A | -1.272406853 |
| SLC16A1  | 1.703611231 | ABCA4     | -1.270058064 |



|           |             |         |              |
|-----------|-------------|---------|--------------|
| C12orf75  | 1.699696661 | SLC2A6  | -1.268979341 |
| CRISP3    | 1.697724795 | EXOSC8  | -1.267315817 |
| SPTBN1    | 1.694840002 | BHLHE41 | -1.265903155 |
| P4HA2     | 1.693824921 | KIF20A  | -1.264243676 |
| CYP4B1    | 1.688333264 | CCDC124 | -1.263020832 |
| MALAT1    | 1.679925878 | COPG2   | -1.2598626   |
| MAMLD1    | 1.679077833 | TMEM38B | -1.258959603 |
| NR4A2     | 1.675355398 | TNIK    | -1.258741869 |
| FLNC      | 1.673821674 | FASN    | -1.254228852 |
| SPTAN1    | 1.672371903 | CDCA2   | -1.253527144 |
| BIRC7     | 1.666215364 | CSTA    | -1.252958583 |
| IFIT3     | 1.665359055 | ETV1    | -1.251110939 |
| FAM46A    | 1.660959114 | RFC3    | -1.248734968 |
| C1QTNF6   | 1.660599324 | CCDC77  | -1.247059899 |
| ABAT      | 1.649334334 | ARL6IP6 | -1.244569175 |
| B4GALT4   | 1.649224966 | LDLR    | -1.241113104 |
| PTPRR     | 1.643604945 | STK39   | -1.240681222 |
| AGAP3     | 1.642288872 | PHB2    | -1.23995741  |
| ATP10D    | 1.639590069 | CLEC2D  | -1.238789476 |
| AHRR      | 1.639121912 | DOK7    | -1.23848235  |
| SLIT2     | 1.639004856 | CYP4F2  | -1.237450809 |
| FLVCR2    | 1.634651329 | UBASH3B | -1.232787217 |
| TFPI2     | 1.634206305 | HINT3   | -1.23236225  |
| STARD13   | 1.631671209 | GSTA4   | -1.229996542 |
| HIST1H2BD | 1.630974863 | ACPL2   | -1.229015373 |
| COL12A1   | 1.629248108 | BRCA1   | -1.227608902 |
| C1orf116  | 1.628871333 | ATAD2   | -1.225625623 |
| SH3TC1    | 1.620690631 | LBR     | -1.224073581 |
| SKIL      | 1.619877584 | MMAB    | -1.22337068  |
| RND3      | 1.613685447 | SPTSSB  | -1.220457501 |

|          |             |         |              |
|----------|-------------|---------|--------------|
| RNF144B  | 1.608458142 | POLD2   | -1.215952322 |
| SORCS2   | 1.607815549 | COQ7    | -1.215841919 |
| MUC15    | 1.607592775 | SPATC1L | -1.215348599 |
| FOSB     | 1.606452348 | MVD     | -1.215033708 |
| SH2B2    | 1.604517323 | PCOLCE2 | -1.214227855 |
| CCRN4L   | 1.601912106 | PAQR4   | -1.214211054 |
| TMEM40   | 1.601206142 | SEPT6   | -1.214104033 |
| MARCKSL1 | 1.594402553 | AMIGO2  | -1.211968506 |
| OR11H6   | 1.591823049 | LTV1    | -1.211344586 |
| HPS5     | 1.591363057 | THSD4   | -1.209502536 |
| FABP3    | 1.58856481  | RAB38   | -1.208886335 |
| IRF9     | 1.583277401 | CYP39A1 | -1.207207003 |
| TMEM50B  | 1.57638719  | PMS2    | -1.207168044 |
| ABI3BP   | 1.576062318 | WDR12   | -1.206351319 |
| MMP14    | 1.575316606 | CENPN   | -1.20370268  |
| DUSP10   | 1.574488278 | SPRED1  | -1.201653381 |
| CD47     | 1.571949172 | FADS1   | -1.19956384  |
| WWC1     | 1.568703869 | GPD1L   | -1.199248023 |
| PBXIP1   | 1.568321898 | DLG2    | -1.198931964 |
| DNAJB2   | 1.563753085 | SLC25A1 | -1.196446454 |
| TMEM132A | 1.563627442 | KYNU    | -1.19625196  |
| BPGM     | 1.562206287 | EEPD1   | -1.195426421 |
| THRB     | 1.562069746 | CYP4F3  | -1.195324717 |
| MYO1B    | 1.558540116 | MGAM    | -1.195239928 |
| ADPRH    | 1.556984728 | SAPCD2  | -1.192660802 |
| BEX4     | 1.556386564 | ALDH3A1 | -1.19177282  |
| MYPN     | 1.552801314 | ERAL1   | -1.189646953 |
| APOL6    | 1.552399225 | WDR31   | -1.188968357 |
| GPC4     | 1.549616097 | EFHC1   | -1.188866108 |
| ANKRD34B | 1.548641014 | RRM1    | -1.18667962  |

|          |             |            |              |
|----------|-------------|------------|--------------|
| PSG1     | 1.546700213 | SPAG5      | -1.185043515 |
| CST6     | 1.546229431 | PTPLA      | -1.184232425 |
| RGCC     | 1.544885193 | CDCA8      | -1.183436383 |
| CDH1     | 1.541676905 | CCDC109B   | -1.182635084 |
| SNX29    | 1.540842183 | CKS1B      | -1.182319702 |
| SUSD2    | 1.538130417 | RNF212     | -1.181580339 |
| TUBA4A   | 1.532306332 | C11orf82   | -1.181514734 |
| MXD1     | 1.531100812 | NDUFAF2    | -1.180849345 |
| CCDC50   | 1.525382613 | HADH       | -1.178885668 |
| C10orf54 | 1.524668267 | MICA       | -1.177658844 |
| A2ML1    | 1.522212378 | CC2D2A     | -1.176342549 |
| TACC1    | 1.519136203 | DNA2       | -1.173563528 |
| CFD      | 1.51719294  | FAM43A     | -1.172712688 |
| TTYH1    | 1.517140758 | TRPV2      | -1.170799437 |
| TNFAIP1  | 1.514130299 | CENPO      | -1.169096675 |
| MYH9     | 1.512946599 | IRX3       | -1.168046819 |
| SGTB     | 1.511747708 | ASCC3      | -1.167482846 |
| TUBB6    | 1.51114661  | DPYD       | -1.165585402 |
| SIK1     | 1.508505069 | HINT2      | -1.164155032 |
| ITGAV    | 1.507256344 | WHSC1      | -1.164152558 |
| PALM3    | 1.506575503 | C2orf68    | -1.162538599 |
| WNT4     | 1.505909347 | CCNB1      | -1.161536906 |
| CTC1     | 1.503409149 | TMPO       | -1.160651967 |
| IL1RL1   | 1.501719451 | HNRNPA1P10 | -1.159404373 |
| BIK      | 1.499537346 | STC2       | -1.158392493 |
| NEDD9    | 1.499524072 | COQ3       | -1.157116206 |
| PDGFD    | 1.499334758 | AADACL3    | -1.156950521 |
| CRIP2    | 1.497069028 | RPL39L     | -1.155769535 |
| PRPS1    | 1.496884291 | EXOSC2     | -1.155619071 |
| MBOAT1   | 1.495198399 | SSX2IP     | -1.153232917 |

|              |             |           |              |
|--------------|-------------|-----------|--------------|
| RRBP1        | 1.494088108 | PPP1R12B  | -1.153135621 |
| CDK14        | 1.49398845  | STMN3     | -1.152178343 |
| RGL1         | 1.491137797 | CFI       | -1.151611846 |
| WDR69        | 1.489096241 | PKMYT1    | -1.144623128 |
| ARID5B       | 1.486087511 | TMEM61    | -1.144057728 |
| CLU          | 1.485130153 | ADAL      | -1.143806347 |
| LPHN2        | 1.482476963 | ZNF22     | -1.142365239 |
| CES2         | 1.480026566 | DPH5      | -1.141238949 |
| FERMT2       | 1.478984426 | RAVER2    | -1.139005864 |
| PRCC         | 1.47788504  | PRC1      | -1.138971556 |
| N4BP2L2      | 1.476111896 | S100P     | -1.138829005 |
| THBS1        | 1.475678175 | MTFR2     | -1.138507656 |
| ULK1         | 1.473678041 | CCDC24    | -1.136035873 |
| LOC101059921 | 1.472218244 | SYK       | -1.136035699 |
| FOLR1        | 1.470982409 | RIBC2     | -1.133472139 |
| COL4A4       | 1.469681714 | ABHD3     | -1.132391675 |
| DOCK11       | 1.469394406 | FOPNL     | -1.131330852 |
| C4orf19      | 1.465716135 | LINC00467 | -1.130255483 |
| IFIT2        | 1.461431329 | ABI2      | -1.129936032 |
| FAM65A       | 1.46047635  | EVX2      | -1.127133776 |
| MFSD6        | 1.458860384 | RPS2P32   | -1.125428116 |
| WFS1         | 1.456995617 | LTA4H     | -1.12463359  |
| OR1N2        | 1.455327861 | ADCY3     | -1.124508778 |
| GPSM1        | 1.454400851 | TPX2      | -1.124004484 |
| EXT1         | 1.454021792 | HJURP     | -1.123793266 |
| KANK1        | 1.453210068 | IDH1      | -1.121755487 |
| COL7A1       | 1.452323512 | CCBL1     | -1.121659027 |
| SMPDL3A      | 1.452009047 | CENPJ     | -1.121097682 |
| GLS          | 1.449675564 | COLEC12   | -1.117760275 |
| TAPBPL       | 1.44886348  | MCM2      | -1.115051941 |

|          |             |              |              |
|----------|-------------|--------------|--------------|
| HTR1D    | 1.448556623 | TRIM16L      | -1.114110225 |
| CPZ      | 1.448231195 | KRT15        | -1.112125384 |
| FYN      | 1.446932111 | FABP6        | -1.111789226 |
| CYP26B1  | 1.445072038 | GINS4        | -1.110979949 |
| EML6     | 1.442253511 | LETMD1       | -1.10900059  |
| C1R      | 1.440538957 | THAP11       | -1.106777881 |
| CLIP1    | 1.437466098 | CETN3        | -1.106761975 |
| JPH2     | 1.435351218 | PDK3         | -1.105962193 |
| SLC26A2  | 1.434589787 | C19orf48     | -1.104443485 |
| CDK6     | 1.433895847 | SULT1C2      | -1.104384369 |
| IFIH1    | 1.432445332 | CES1         | -1.104123719 |
| COL4A6   | 1.431505466 | LTBP2        | -1.103914807 |
| ALPPL2   | 1.427464511 | FAM92A1      | -1.103782369 |
| C11orf95 | 1.427299089 | XRCC6BP1     | -1.100287856 |
| UGCG     | 1.425475383 | TSEN2        | -1.100227135 |
| DYNC1H1  | 1.423394686 | KIAA1467     | -1.098407673 |
| SOX4     | 1.421261075 | EME1         | -1.097468219 |
| BAG1     | 1.421166014 | MS4A1        | -1.097431999 |
| SAT1     | 1.419043045 | HAUS8        | -1.097062267 |
| PCSK6    | 1.417607966 | BRI3BP       | -1.096032689 |
| PCSK5    | 1.416565323 | HMGCS1       | -1.095260742 |
| ITPKC    | 1.416515352 | HCAR1        | -1.093050528 |
| HSPA2    | 1.414534035 | CHEK2        | -1.092818258 |
| RCAN2    | 1.413083795 | ADD2         | -1.092122748 |
| UBE2J1   | 1.412519092 | MED30        | -1.092028609 |
| EIF2AK3  | 1.410775662 | LOC101060634 | -1.090808772 |
| CAMK1D   | 1.410498927 | XDH          | -1.08789712  |
| TRAF2    | 1.408658459 | TIAM1        | -1.087431758 |
| SQSTM1   | 1.407924335 | CAT          | -1.085613209 |
| CYTL1    | 1.404510773 | C4B          | -1.084849406 |

|           |             |          |              |
|-----------|-------------|----------|--------------|
| HMHA1     | 1.402949731 | CCDC34   | -1.084384361 |
| PRSS23    | 1.402352587 | MSANTD3  | -1.084249911 |
| ALS2CL    | 1.40162483  | RAB26    | -1.077070836 |
| AFF1      | 1.400070646 | MXD3     | -1.074109135 |
| TOB1      | 1.395356842 | SLC16A5  | -1.072088924 |
| PLA2G10   | 1.394595017 | TSEN15   | -1.07188962  |
| OSBPL2    | 1.394018996 | COL4A2   | -1.070410405 |
| MTF1      | 1.393067552 | NOB1     | -1.067314016 |
| SLC36A1   | 1.384940542 | PHF19    | -1.067190864 |
| ADORA2A   | 1.382143383 | TMEM253  | -1.063892351 |
| OPTN      | 1.38192381  | NINJ2    | -1.063684818 |
| C14orf159 | 1.380609745 | NEIL3    | -1.063347675 |
| CAMSAP3   | 1.378751046 | GSR      | -1.063086161 |
| COL4A5    | 1.378557156 | OLFML3   | -1.063035079 |
| RARRES2   | 1.376567144 | SLC7A11  | -1.060904233 |
| LTBP1     | 1.369064304 | HS3ST1   | -1.057415453 |
| CDH2      | 1.365438076 | PLP2     | -1.057010823 |
| CDH3      | 1.363774112 | THNSL2   | -1.056623424 |
| ERAP1     | 1.360790218 | KIAA1524 | -1.055220853 |
| TAP1      | 1.359755863 | ENTPD6   | -1.055006416 |
| QPCT      | 1.357308902 | ZNF367   | -1.050959427 |
| CCL26     | 1.355808925 | RAN      | -1.050861266 |
| MID1      | 1.355270821 | QRICH2   | -1.04969904  |
| CACNA1I   | 1.354060753 | RAB12    | -1.049674919 |
| MYADM     | 1.353029625 | ELFN2    | -1.048664665 |
| LINGO2    | 1.352866061 | AGBL5    | -1.048051365 |
| DNAJC3    | 1.352490981 | SNX12    | -1.046937147 |
| ANXA2     | 1.35102028  | AURKA    | -1.045840894 |
| DENND2C   | 1.350516324 | ITGA6    | -1.044409685 |
| KLF6      | 1.350148397 | TTF2     | -1.044219982 |

|          |             |          |              |
|----------|-------------|----------|--------------|
| SLITRK4  | 1.349377726 | GOLT1A   | -1.040455625 |
| CHI3L2   | 1.349277252 | SNRNP25  | -1.040072049 |
| SLC4A11  | 1.34816031  | RDM1     | -1.03857043  |
| FAM53B   | 1.348056974 | LYAR     | -1.038355321 |
| CRIP1    | 1.347863653 | UBE2C    | -1.038145562 |
| PSCA     | 1.346290457 | MRPL11   | -1.038119881 |
| GAA      | 1.346187606 | ZFAND1   | -1.036206626 |
| FEM1C    | 1.345216321 | TRAIP    | -1.036038709 |
| CHPF2    | 1.342415181 | UBL4A    | -1.035387724 |
| MAFK     | 1.341244877 | CIT      | -1.035311221 |
| GGT1     | 1.340572513 | STOX1    | -1.03409966  |
| PHACTR2  | 1.339531227 | PADI4    | -1.032800674 |
| CTSA     | 1.339461939 | MTHFD2   | -1.03258816  |
| B4GALNT1 | 1.339181342 | GRB14    | -1.032471311 |
| SERPING1 | 1.337853193 | HAUS1    | -1.027412717 |
| SP5      | 1.335199222 | C5orf45  | -1.027331193 |
| PARP14   | 1.333995319 | KNSTRN   | -1.027099419 |
| ZMIZ2    | 1.333503773 | CKLF     | -1.025687835 |
| MAST4    | 1.328679143 | NASP     | -1.024725745 |
| COBLL1   | 1.328335331 | ME1      | -1.024292904 |
| DAPP1    | 1.328204504 | EXOSC9   | -1.024114186 |
| HIVEP2   | 1.32758041  | HSD17B12 | -1.024023709 |
| TAGLN2   | 1.327548055 | C20orf27 | -1.023263822 |
| LOC79015 | 1.32642141  | PKIA     | -1.021568319 |
| C3orf58  | 1.31951273  | RBMX     | -1.021491866 |
| GATA2    | 1.314726722 | ACSL3    | -1.017454048 |
| LUZP1    | 1.314131921 | IGFLR1   | -1.014848271 |
| ALDH1A3  | 1.314073799 | HIST1H1D | -1.014473203 |
| LATS2    | 1.311153745 | CHAC2    | -1.013962738 |
| OCLN     | 1.309732174 | NR1H3    | -1.008233825 |

|            |             |          |              |
|------------|-------------|----------|--------------|
| TRIM29     | 1.30937004  | RFXAP    | -1.007935569 |
| FBXO32     | 1.3071687   | YARS     | -1.007402846 |
| RASSF5     | 1.305088999 | LY9      | -1.007342907 |
| BAMBI      | 1.303029416 | ERCC6L   | -1.007227039 |
| IDUA       | 1.302683801 | CDC7     | -1.00675952  |
| EDNRB      | 1.300411192 | PARP16   | -1.005421747 |
| PARP12     | 1.298490639 | TRMT11   | -1.004953014 |
| TCN2       | 1.297974328 | ASF1A    | -1.003901873 |
| C1orf106   | 1.294402576 | CHAF1A   | -1.003492904 |
| JUN        | 1.294337538 | CENPQ    | -1.002932428 |
| DSP        | 1.291134976 | PSIP1    | -1.002512072 |
| PPP2R3A    | 1.288880318 | HNMT     | -1.000523083 |
| CYP2J2     | 1.287818809 | MREG     | -0.998336621 |
| PML        | 1.287532379 | PLEK2    | -0.998082821 |
| GPR37      | 1.287061648 | DTD1     | -0.998018769 |
| IGSF9      | 1.284831631 | RPIA     | -0.995940596 |
| EHD2       | 1.284151541 | REG3G    | -0.993783839 |
| ETS2       | 1.283427602 | ITGB5    | -0.993557246 |
| LHFPL2     | 1.283137705 | DHODH    | -0.99219272  |
| PLCD3      | 1.282823828 | LHX1     | -0.991465293 |
| RRP12      | 1.278853227 | CEP290   | -0.991386264 |
| CSGALNACT1 | 1.27878501  | ERMP1    | -0.987901078 |
| OAS1       | 1.277576    | DTWD1    | -0.987873328 |
| TUBB3      | 1.276642715 | RNASEH2A | -0.987621547 |
| PLEKHA4    | 1.275862598 | NTHL1    | -0.986866999 |
| LAMC1      | 1.272916617 | ORC6     | -0.985581481 |
| HSPA9      | 1.270715941 | MGST1    | -0.985096302 |
| CXCL16     | 1.270601077 | MAN1A1   | -0.984847537 |
| UNC13D     | 1.268627108 | NSMCE4A  | -0.983812161 |
| LHFP       | 1.267432723 | NEK4     | -0.983608047 |



|              |             |                 |              |
|--------------|-------------|-----------------|--------------|
| KCNK1        | 1.266060682 | UHRF1           | -0.982890666 |
| DST          | 1.265928309 | AKR1C1          | -0.981784412 |
| ABTB2        | 1.264387758 | PHEX            | -0.98124566  |
| CTSO         | 1.264338324 | STEAP2          | -0.98089163  |
| WFDC12       | 1.263474433 | DHRS11          | -0.978983463 |
| TMEM139      | 1.26022897  | FKBP5           | -0.978346028 |
| PVRL3        | 1.259726325 | DNMBP           | -0.97550094  |
| PLEKHG6      | 1.259134475 | PBX1            | -0.973982386 |
| PROSAPIP1    | 1.255390431 | LYPLA1          | -0.973868175 |
| LPCAT1       | 1.253004182 | TRIM7           | -0.973423197 |
| CYB561D2     | 1.252065736 | IGFBP2          | -0.972746013 |
| CD74         | 1.251805993 | ZAK             | -0.972225221 |
| GAS6         | 1.250122012 | DCTN3           | -0.97203471  |
| SLC9A2       | 1.250076317 | TDRKH           | -0.971014712 |
| LAYN         | 1.249311594 | SESN2           | -0.967856746 |
| STXBP6       | 1.248736208 | PHOSPHO2-KLHL23 | -0.967188616 |
| KL           | 1.247610516 | FHIT            | -0.966965283 |
| HIVEP1       | 1.247482399 | GGH             | -0.965520591 |
| AFF4         | 1.246826788 | NMNAT3          | -0.964211908 |
| WEE1         | 1.241871947 | BTBD16          | -0.963566246 |
| MLLT11       | 1.241273112 | HDHD1           | -0.963487515 |
| CR2          | 1.235435673 | ADA             | -0.962721911 |
| TGM1         | 1.234209135 | SLC1A5          | -0.962068774 |
| VGLL4        | 1.234142255 | RNASE7          | -0.961385321 |
| ITGAM        | 1.23411799  | EYA1            | -0.960620452 |
| THBS3        | 1.232441486 | EIF2A           | -0.960239739 |
| GLIS3        | 1.231509901 | RSL1D1          | -0.960180612 |
| PSMB9        | 1.229202875 | AKR1C2          | -0.958669436 |
| LOC100134361 | 1.227846989 | CDC20           | -0.957643296 |
| PCBP4        | 1.226685001 | E2F4            | -0.954979688 |

|          |             |              |              |
|----------|-------------|--------------|--------------|
| FA2H     | 1.224019926 | RCL1         | -0.95474353  |
| CITED2   | 1.223768461 | SLC20A1      | -0.954459541 |
| SLC12A8  | 1.221861313 | CPNE7        | -0.954374417 |
| LOXL2    | 1.218818411 | LOC100129034 | -0.953720114 |
| ITPRIP   | 1.217510513 | NCAPG2       | -0.952850358 |
| FAM114A1 | 1.216460347 | TAS2R10      | -0.952654571 |
| CD99L2   | 1.214513133 | PODXL        | -0.951914867 |
| PPP2R5B  | 1.21260474  | CALHM3       | -0.951102332 |
| SUPT5H   | 1.212416895 | BORA         | -0.950888232 |
| KDM2A    | 1.212084056 | RAB4B        | -0.949625178 |
| FAM107B  | 1.210018501 | AGPHD1       | -0.948693924 |
| IFI44    | 1.209956091 | LOC100129480 | -0.948180629 |
| STK38L   | 1.209384973 | RMDN1        | -0.948124163 |
| SYT1     | 1.207223036 | DBI          | -0.948121398 |
| GPM6A    | 1.206420527 | HIRIP3       | -0.947805626 |
| NOTCH2   | 1.204690634 | NINJ1        | -0.946849503 |
| DENND5A  | 1.204517402 | KIF2C        | -0.946815139 |
| PGBD3    | 1.203911834 | UBE2E3       | -0.946588859 |
| PISD     | 1.201902961 | FERMT1       | -0.94646385  |
| C4BPB    | 1.201114115 | DET1         | -0.946460386 |
| GBA2     | 1.200585801 | METAP1       | -0.94485433  |
| ZNF761   | 1.199552345 | HPRT1        | -0.943136688 |
| TFAP2A   | 1.196589123 | TNFRSF10A    | -0.94310612  |
| CLEC7A   | 1.196467025 | MRGPRX2      | -0.942681831 |
| ARHGEF4  | 1.195647356 | ACTA2        | -0.94106847  |
| SLC35C1  | 1.195303842 | GPX2         | -0.938650548 |
| ENPP5    | 1.195051274 | C11orf49     | -0.938425866 |
| NFKBIA   | 1.194960736 | SOX7         | -0.937754792 |
| OSBPL7   | 1.194611378 | PTTG3P       | -0.937703491 |
| CASKIN2  | 1.193417315 | DYNC2LI1     | -0.93768186  |

|          |             |              |              |
|----------|-------------|--------------|--------------|
| HIST1H4H | 1.19301025  | ARV1         | -0.936597264 |
| CD59     | 1.192583298 | LOC101059911 | -0.93498716  |
| KAZN     | 1.192234577 | UNG          | -0.934918994 |
| ATG14    | 1.19197826  | UMPS         | -0.934571857 |
| C19orf70 | 1.191159663 | ZNF474       | -0.933443092 |
| C19orf21 | 1.190717772 | RFC2         | -0.932723006 |
| SCN1B    | 1.190635827 | METAP1D      | -0.931304817 |
| IRF1     | 1.190254871 | ISYNA1       | -0.930849591 |
| DGCR2    | 1.18785109  | NARS2        | -0.930241472 |
| NCALD    | 1.187735383 | PROSC        | -0.929516689 |
| SLC22A5  | 1.187424227 | INO80C       | -0.928678538 |
| MAN2B1   | 1.186128388 | MYEOV        | -0.928472778 |
| GDPD5    | 1.185348025 | KIAA1468     | -0.926083761 |
| ARID4B   | 1.182571307 | DNAH14       | -0.925879381 |
| GLCCI1   | 1.179340963 | NRP1         | -0.925879381 |
| IGSF23   | 1.178777783 | C4orf32      | -0.925838587 |
| B4GALT1  | 1.177926893 | NGEF         | -0.925671753 |
| AKAP2    | 1.176889559 | C11orf85     | -0.924044776 |
| JAG2     | 1.176781681 | C19orf40     | -0.922456466 |
| TAPBP    | 1.176483362 | PDSS1        | -0.922209369 |
| ZHX3     | 1.176209613 | ABCC2        | -0.922174703 |
| FUT1     | 1.174079912 | GAMT         | -0.920454829 |
| SEMA3C   | 1.173164486 | FNIP2        | -0.918382789 |
| SLC20A2  | 1.170572825 | GLYCTK       | -0.918358052 |
| GYS1     | 1.168513912 | CCDC113      | -0.918012702 |
| PLAC8    | 1.167784498 | ILKAP        | -0.915551043 |
| DAB2     | 1.167668288 | PDE7A        | -0.915332256 |
| TNFRSF21 | 1.16724821  | SRR          | -0.915323049 |
| BCAR1    | 1.167195935 | POLR1D       | -0.914430772 |
| TET3     | 1.166978904 | LOC285074    | -0.913120677 |

|           |             |          |              |
|-----------|-------------|----------|--------------|
| AQP1      | 1.166667594 | HS3ST3A1 | -0.91305861  |
| STEAP4    | 1.166452976 | GLS2     | -0.910797183 |
| LEPROT    | 1.16526944  | RBP3     | -0.91011793  |
| ASAH1     | 1.162642161 | CYB5R4   | -0.909681778 |
| GCNT3     | 1.161489245 | C1orf112 | -0.909599528 |
| ERCC6     | 1.159433456 | SLC27A2  | -0.909349422 |
| AMPD2     | 1.158891258 | ST20     | -0.909118827 |
| RTKN2     | 1.158805928 | PER3     | -0.909084852 |
| TRPM4     | 1.158453001 | ALDH1L1  | -0.908682921 |
| PID1      | 1.156388321 | GBAS     | -0.90794905  |
| KRT80     | 1.154894829 | IQCG     | -0.907148863 |
| ACAA1     | 1.154019378 | C11orf93 | -0.90666874  |
| FXYD4     | 1.153645833 | PAQR5    | -0.905474327 |
| MKL1      | 1.153128234 | TIFA     | -0.903568408 |
| DUSP16    | 1.152088063 | STX10    | -0.903167136 |
| IVL       | 1.151765768 | MMEL1    | -0.903030509 |
| SELM      | 1.151284535 | MRPS34   | -0.902999373 |
| MAP7D1    | 1.150940739 | PFKFB1   | -0.902739825 |
| HSPG2     | 1.150788845 | BLOC1S1  | -0.90202277  |
| RAB31     | 1.149025076 | AP2S1    | -0.901530631 |
| PTHLH     | 1.147136848 | LIAS     | -0.901317653 |
| F3        | 1.146054011 | FANCL    | -0.898898361 |
| DAPK3     | 1.145786642 | SC5DL    | -0.896607961 |
| WIPF3     | 1.14556522  | MAP3K1   | -0.896603296 |
| NDFIP2    | 1.145034375 | MEF2C    | -0.896464562 |
| XKR6      | 1.1440752   | LSM2     | -0.896035718 |
| SLC5A6    | 1.143275871 | MRPL30   | -0.896025474 |
| TEAD1     | 1.140825546 | GPR19    | -0.893319951 |
| LINC00338 | 1.140758041 | YWHAE    | -0.891536996 |
| ANKRD10   | 1.1395458   | C11orf70 | -0.889313194 |

|          |             |                |              |
|----------|-------------|----------------|--------------|
| NPLOC4   | 1.13917009  | ACYP1          | -0.884478069 |
| TGOLN2   | 1.138751686 | CA5A           | -0.883520127 |
| SLC24A6  | 1.138021616 | DNM1           | -0.883122364 |
| COL18A1  | 1.137810191 | BAGE2          | -0.882652239 |
| PPM1H    | 1.136934374 | SFRP1          | -0.882600683 |
| CD97     | 1.135285893 | COX7A2L        | -0.879585913 |
| MGAT4A   | 1.135236682 | KNTC1          | -0.879464899 |
| IFI27    | 1.135153848 | CDKN2D         | -0.879154534 |
| SGSH     | 1.133604806 | TACC3          | -0.878452093 |
| KRT5     | 1.133473995 | CTSC           | -0.877773723 |
| KIAA1462 | 1.133123308 | KRT81          | -0.876468981 |
| C8orf46  | 1.13237291  | TTLL1          | -0.876131409 |
| DOCK1    | 1.132053384 | MCM7           | -0.876062116 |
| EPHA10   | 1.131508669 | METAP2         | -0.874878112 |
| FGFR1    | 1.130622064 | RASA1          | -0.873496337 |
| ZNF425   | 1.13044809  | COL4A1         | -0.872428935 |
| LGALS3BP | 1.130165081 | RPL17-C18orf32 | -0.871913103 |
| NDST1    | 1.129428239 | C14orf93       | -0.871383968 |
| KIAA0247 | 1.125784164 | H2AFJ          | -0.871350457 |
| PINK1    | 1.125547278 | NOXO1          | -0.871083898 |
| ZC3H12A  | 1.124991531 | SUPT3H         | -0.869558798 |
| PITPNM1  | 1.122429474 | ITGA2          | -0.869473379 |
| BTN2A1   | 1.121035449 | TEX30          | -0.86943801  |
| IFNGR1   | 1.120886963 | PAICS          | -0.869356435 |
| PCSK7    | 1.120568475 | MSRB1          | -0.867874587 |
| ZBTB43   | 1.119727398 | SMC4           | -0.867765222 |
| C6orf222 | 1.117326743 | TRA2B          | -0.867417536 |
| NANOS3   | 1.11513206  | C16orf95       | -0.865466225 |
| MYO1E    | 1.114046051 | FAM3D          | -0.864004971 |
| APC      | 1.111299088 | ZCCHC24        | -0.863515242 |

|           |             |              |              |
|-----------|-------------|--------------|--------------|
| EPB41L2   | 1.110126719 | GLO1         | -0.862980268 |
| ADCY9     | 1.109957598 | RAB23        | -0.860541689 |
| KIAA1644  | 1.109397179 | RBM12        | -0.860521575 |
| CSRP2     | 1.109361873 | PQBP1        | -0.860365924 |
| GFOD1     | 1.107696653 | NCAPD2       | -0.860086092 |
| HIST1H2AC | 1.107597355 | CHST4        | -0.859997988 |
| TM4SF1    | 1.105821167 | VEGFC        | -0.859265573 |
| ZNF211    | 1.105043899 | APIP         | -0.8578166   |
| JUP       | 1.101521898 | ACAT1        | -0.857794766 |
| TGFA      | 1.100904393 | SLC29A2      | -0.857726207 |
| SLC46A3   | 1.099514353 | IGBP1        | -0.856413523 |
| GMIP      | 1.099404903 | LOC100653034 | -0.855788519 |
| SMPD1     | 1.099196561 | SERPINB1     | -0.854981221 |
| NTN4      | 1.098953136 | CLPSL2       | -0.854674733 |
| GBP3      | 1.098331352 | CDCA7L       | -0.853276151 |
| PPP1R13B  | 1.097326229 | ERCC2        | -0.852917303 |
| NNMT      | 1.096525752 | TAF1A        | -0.851901785 |
| PAWR      | 1.096170277 | CCNB1IP1     | -0.851316356 |
| TMEM57    | 1.096127905 | PYROXD2      | -0.849426424 |
| C7orf41   | 1.095968693 | EPHX1        | -0.849116943 |
| KIF13A    | 1.094961337 | POC1A        | -0.848869248 |
| DSG2      | 1.093629147 | PIR          | -0.84844633  |
| ZNF654    | 1.093216965 | MRPL24       | -0.848175433 |
| CLDN4     | 1.092469803 | UBA2         | -0.847325786 |
| AKAP13    | 1.090781919 | CD58         | -0.846615121 |
| MICALL2   | 1.090204107 | DPM3         | -0.846324286 |
| STAT3     | 1.090022243 | HLTF         | -0.844552464 |
| PSAP      | 1.089234497 | CYC1         | -0.843994334 |
| INPPL1    | 1.08880512  | LSM6         | -0.843894154 |
| EIF2S1    | 1.087895307 | CALHM2       | -0.842893411 |

|         |             |           |              |
|---------|-------------|-----------|--------------|
| LAMB2   | 1.086575225 | UTP6      | -0.841700186 |
| RAB42   | 1.085154405 | VAMP4     | -0.841463631 |
| ASPHD1  | 1.084422943 | HYAL1     | -0.84144996  |
| GGTLC1  | 1.081356351 | ALKBH8    | -0.841064974 |
| COPG1   | 1.079700997 | CYHR1     | -0.840590136 |
| DNAJC15 | 1.07929093  | PCBD1     | -0.840113017 |
| CYLD    | 1.078211989 | KIF4A     | -0.840081462 |
| TNIP1   | 1.077216058 | CHAC1     | -0.839864641 |
| PDE5A   | 1.076410089 | FGFR3     | -0.83850537  |
| FNIP1   | 1.076299504 | AK4       | -0.838354355 |
| TRAFD1  | 1.076116324 | NUP88     | -0.838352537 |
| PTPN14  | 1.074954671 | FAM86B3P  | -0.837610056 |
| DBN1    | 1.07471612  | EPAS1     | -0.83738258  |
| CCDC126 | 1.072812274 | LPCAT3    | -0.836580096 |
| PP14571 | 1.070319765 | EMP2      | -0.836286808 |
| EDC4    | 1.068763865 | ACN9      | -0.836260905 |
| AVPI1   | 1.068668145 | PPIH      | -0.83617658  |
| DGKD    | 1.067063169 | TMEM107   | -0.835536567 |
| RAPGEF2 | 1.066817381 | TMEM194A  | -0.83545183  |
| ZNF611  | 1.066520711 | CEP57     | -0.834246274 |
| PLXNA1  | 1.066367099 | HDHD2     | -0.83229512  |
| PPL     | 1.064943645 | RLN2      | -0.832048276 |
| BST1    | 1.064622293 | WDFY2     | -0.831792655 |
| TFRC    | 1.064458162 | CETN2     | -0.831505605 |
| SNPH    | 1.063526329 | LOC728769 | -0.831285875 |
| TXLNA   | 1.063380684 | LOC93622  | -0.83111908  |
| ZBTB10  | 1.062663909 | ROCK1     | -0.830883639 |
| CKB     | 1.059885022 | MTR       | -0.830683948 |
| TOM1    | 1.05936583  | WARS2     | -0.830045688 |
| ARFGAP1 | 1.058792828 | MAFA      | -0.829446519 |

|          |             |              |              |
|----------|-------------|--------------|--------------|
| ARHGAP26 | 1.057715099 | PRSS21       | -0.826738828 |
| ACTN4    | 1.056583312 | ARMC8        | -0.825468097 |
| AFP      | 1.056363168 | ADSL         | -0.824978222 |
| GPC1     | 1.056075486 | SCNN1A       | -0.823986613 |
| SMCR8    | 1.055546796 | TRMT10A      | -0.823918556 |
| RAB32    | 1.055325369 | KIF23        | -0.823719006 |
| FBLIM1   | 1.055145946 | GMDS         | -0.82319061  |
| TUBB2A   | 1.054709662 | FAM175A      | -0.822812424 |
| CSRNP2   | 1.054424598 | MUTYH        | -0.822401616 |
| ABHD2    | 1.05352792  | QPCTL        | -0.822228665 |
| EPHA1    | 1.052720217 | MSH6         | -0.82104077  |
| FOSL2    | 1.051946561 | WRB          | -0.820859235 |
| FOXN2    | 1.051786581 | MAPKAPK5-AS1 | -0.820410364 |
| ZBED1    | 1.050787292 | LEPR         | -0.81994186  |
| FAM126A  | 1.049497341 | ANXA1        | -0.819446868 |
| CRIM1    | 1.049366357 | AP3B2        | -0.819441243 |
| SEC24D   | 1.048559758 | ELP5         | -0.819117717 |
| LAMC2    | 1.048483449 | SIGMAR1      | -0.819022343 |
| CLTB     | 1.047858372 | MEGF9        | -0.816502454 |
| FAM212B  | 1.047266017 | SNRPA        | -0.816488067 |
| PPFIBP1  | 1.046704376 | GPR116       | -0.816428933 |
| BEND6    | 1.046519789 | FBXO16       | -0.81623887  |
| ELMO2    | 1.046315956 | SGCE         | -0.816052822 |
| SLC29A3  | 1.045909153 | NBEAL2       | -0.815599938 |
| EFNA1    | 1.045415938 | SLC51A       | -0.815599938 |
| ATG4D    | 1.044906906 | BUB1B        | -0.815335381 |
| PURB     | 1.043574886 | EEF1B2       | -0.814950846 |
| SLC30A7  | 1.04294162  | COPE         | -0.813545013 |
| ARL4A    | 1.041671066 | ABCB7        | -0.8129901   |
| EGFL8    | 1.041542612 | CPSF4        | -0.808900029 |



|           |             |          |              |
|-----------|-------------|----------|--------------|
| CBX6      | 1.041283223 | FLOT1    | -0.808655276 |
| PIGG      | 1.041227612 | PIK3R3   | -0.808198815 |
| ADAMTS9   | 1.04002146  | BMPR1B   | -0.808192092 |
| SIK3      | 1.039457192 | IRAK1BP1 | -0.807368508 |
| DAG1      | 1.037889142 | USP28    | -0.807324221 |
| ANKLE2    | 1.037826293 | MPP6     | -0.807198314 |
| TMEM133   | 1.037017486 | TTC12    | -0.806699543 |
| INPP4A    | 1.035013712 | PRR15    | -0.805560855 |
| KIAA0930  | 1.034592723 | CCP110   | -0.805476347 |
| NPR3      | 1.034556913 | EXOSC5   | -0.804827191 |
| C20orf141 | 1.034129451 | NRIP1    | -0.804817778 |
| NAV2      | 1.03269704  | QPRT     | -0.803966465 |
| RARB      | 1.03269699  | DYX1C1   | -0.803538833 |
| CREB3L2   | 1.032337705 | CYP4V2   | -0.803338206 |
| SLC15A3   | 1.032260469 | MSH2     | -0.802141247 |
| GRK4      | 1.032260469 | HSDL2    | -0.801906564 |
| ATF6B     | 1.031780565 | CASP6    | -0.801561274 |
| PDGFA     | 1.027752087 | CHCHD6   | -0.801484053 |
| CHPF      | 1.02769634  | PRKACB   | -0.801388145 |
| PNRC1     | 1.027685535 | MRPS15   | -0.801333633 |
| SGK1      | 1.027077922 | GLOD5    | -0.799045301 |
| PXDN      | 1.02655863  | GRPEL2   | -0.798912024 |
| SORBS2    | 1.026515759 | FAM81B   | -0.798497138 |
| IGF2R     | 1.02649505  | AP3M2    | -0.798204488 |
| HIST1H3D  | 1.025904099 | ERCC8    | -0.797615198 |
| GBA       | 1.025647255 | DAAM1    | -0.796874995 |
| ZSWIM4    | 1.024116518 | TBC1D8   | -0.794540453 |
| ABHD16A   | 1.023556099 | NRM      | -0.79444793  |
| PRKRIP1   | 1.02288753  | ZNRD1    | -0.794305678 |
| SLC22A4   | 1.02285092  | PRMT3    | -0.793393075 |

|         |             |           |              |
|---------|-------------|-----------|--------------|
| TULP4   | 1.022480306 | C20orf196 | -0.792899555 |
| MAP4    | 1.022371874 | OSGEPL1   | -0.792558008 |
| RIN2    | 1.021638184 | SPCS2     | -0.792366201 |
| GPR158  | 1.020815742 | C1QBP     | -0.792268421 |
| MAGEC2  | 1.020735125 | CENPF     | -0.791582849 |
| COL17A1 | 1.020732199 | TRAF3IP3  | -0.790898005 |
| ATG2A   | 1.020465832 | E2F7      | -0.790785781 |
| YTHDF1  | 1.020258149 | SOX13     | -0.790667887 |
| GAB3    | 1.01926264  | MKI67     | -0.790394064 |
| TP53BP2 | 1.019141122 | HFE       | -0.790208244 |
| FAM102A | 1.018937235 | SORCS1    | -0.789822604 |
| TPRA1   | 1.018667521 | CCDC111   | -0.789171091 |
| MED15   | 1.018133897 | FOXRED1   | -0.788183705 |
| CCDC146 | 1.017819721 | PABPC1    | -0.786653488 |
| HSPA5   | 1.017614179 | TFAM      | -0.783654414 |
| OPN3    | 1.017544864 | MCM4      | -0.782991791 |
| SNTA1   | 1.016879137 | ACOXL     | -0.782636879 |
| DNAJC13 | 1.016127077 | USP37     | -0.782411132 |
| TTC9    | 1.016122876 | APITD1    | -0.781792552 |
| SOD3    | 1.014791969 | RHEBL1    | -0.78129284  |
| QSOX1   | 1.014706388 | ADSS      | -0.780940617 |
| ZFP36L1 | 1.01417228  | PGD       | -0.779977746 |
| BAI2    | 1.013592891 | TAF1L     | -0.77980302  |
| PIGT    | 1.012755578 | HSD17B8   | -0.779573978 |
| SNORA25 | 1.011861742 | IL1A      | -0.779327882 |
| DOK4    | 1.011549333 | SEPT10    | -0.779069854 |
| ENC1    | 1.010322868 | UNCX      | -0.778838193 |
| IL1RAP  | 1.009625567 | ERRFI1    | -0.777925064 |
| PRRG1   | 1.00961061  | C16orf93  | -0.777569489 |
| ECE2    | 1.008471804 | MRPS2     | -0.777250533 |

|              |             |           |              |
|--------------|-------------|-----------|--------------|
| HIST2H4B     | 1.008331707 | ATP2C2    | -0.774101107 |
| SLC6A8       | 1.006975245 | C22orf32  | -0.774078329 |
| PNPLA4       | 1.006847035 | PLAT      | -0.77344384  |
| MAGED2       | 1.006824238 | POLR1E    | -0.77283775  |
| FGF18        | 1.006486372 | BSPRY     | -0.772815749 |
| SERF2        | 1.006126602 | SNRPD1    | -0.771077671 |
| EXT2         | 1.006113598 | FOXC1     | -0.770982912 |
| FKBP7        | 1.004572197 | NUDT6     | -0.77073328  |
| MUM1L1       | 1.003731793 | NFIL3     | -0.769838592 |
| ZNF185       | 1.003540613 | NUDT2     | -0.769746886 |
| TEX14        | 1.002645726 | LOC344887 | -0.768888953 |
| PPP3CC       | 1.002332577 | SPDL1     | -0.768150302 |
| ARHGAP17     | 1.001087967 | PMF1      | -0.768075635 |
| NFKBIE       | 1.00036924  | CFDP1     | -0.766725705 |
| KCNAB2       | 1.000243747 | NCR3LG1   | -0.766231392 |
| TSPAN3       | 1.000027082 | C4orf27   | -0.766153716 |
| MRAS         | 0.999931256 | CD72      | -0.766140688 |
| TMEM127      | 0.999438434 | COPS6     | -0.765954689 |
| LOC101060462 | 0.999108054 | DARS      | -0.765913018 |
| PTRH1        | 0.998849432 | MST4      | -0.765449681 |
| VIM          | 0.997506512 | C16orf55  | -0.764200039 |
| SERTAD1      | 0.997452497 | SEC22C    | -0.764194196 |
| EGLN1        | 0.997112184 | ELOVL5    | -0.764071538 |
| ZBTB20       | 0.996606473 | DYRK1B    | -0.763299658 |
| NPC1         | 0.996150632 | TTC32     | -0.763031818 |
| FBXO31       | 0.996078638 | METTLL17  | -0.762609818 |
| TECPR2       | 0.995918424 | FABP5P3   | -0.76155979  |
| MCAM         | 0.995325483 | HYLS1     | -0.761117563 |
| C15orf52     | 0.995102485 | CINP      | -0.760992802 |
| SDC3         | 0.994877608 | C12orf45  | -0.760863486 |

|           |             |         |              |
|-----------|-------------|---------|--------------|
| GOLIM4    | 0.994432485 | CKS2    | -0.759691746 |
| ZNF880    | 0.994295531 | CT62    | -0.759684872 |
| MICAL2    | 0.994198474 | TMEM116 | -0.759681957 |
| MED23     | 0.993385279 | MCCD1   | -0.759577966 |
| ALDH3B1   | 0.993218985 | VMP1    | -0.759407194 |
| NCEH1     | 0.993092546 | MDFIC   | -0.758592873 |
| CALD1     | 0.992889626 | STIL    | -0.758206583 |
| NFE2      | 0.992382915 | SLCO1B1 | -0.757312917 |
| RHBDF1    | 0.992045392 | SUSD3   | -0.757221096 |
| ABCC10    | 0.991473049 | PEG10   | -0.756784593 |
| MAP1B     | 0.991361393 | GALNT11 | -0.756654883 |
| MAP2      | 0.990273122 | HMG2    | -0.756646671 |
| CLN8      | 0.989354146 | MRPS28  | -0.755844195 |
| PEA15     | 0.988021753 | DHFR    | -0.75516301  |
| INPP5K    | 0.986830808 | TMEM17  | -0.754428774 |
| TSPAN8    | 0.985788576 | CHAF1B  | -0.754215208 |
| EIF2C2    | 0.985070986 | LIPT2   | -0.752727008 |
| DNAJB11   | 0.984846675 | RPL23   | -0.751137329 |
| ZSWIM8    | 0.984037656 | POT1    | -0.751126486 |
| CERS6     | 0.983460995 | MARC1   | -0.750752094 |
| SLC38A7   | 0.983256754 | SPAG4   | -0.750643314 |
| KLK5      | 0.982514944 | NUP54   | -0.750154777 |
| NFATC1    | 0.981213387 | TP53TG1 | -0.749957261 |
| PALLD     | 0.980401374 | EIF3E   | -0.749288618 |
| MAGI1     | 0.979891306 | SETDB1  | -0.74918448  |
| RAB11FIP5 | 0.979071961 | RAD54L  | -0.748834544 |
| HIST1H1C  | 0.978747318 | PKIB    | -0.748476792 |
| NKX2-1    | 0.978581685 | VGLL1   | -0.747898147 |
| IRGQ      | 0.97838867  | CENPE   | -0.747257586 |
| PROS1     | 0.978174241 | COMP    | -0.746950326 |

|           |             |              |              |
|-----------|-------------|--------------|--------------|
| SETX      | 0.977615687 | NMNAT1       | -0.746743162 |
| LOC338963 | 0.975126868 | MAGEF1       | -0.746028162 |
| IGSF11    | 0.974518564 | ZNF846       | -0.744737005 |
| NFKB1     | 0.97439896  | RPS4X        | -0.744420779 |
| KIAA0226  | 0.972923639 | ELP4         | -0.744382491 |
| LRP10     | 0.972401581 | TRNP1        | -0.743828319 |
| ZNF175    | 0.97182487  | CDC25B       | -0.743303998 |
| NPFFR2    | 0.971127681 | CKAP2L       | -0.743204228 |
| FAT3      | 0.970919166 | TM7SF2       | -0.743171231 |
| STAT1     | 0.969364679 | GSTZ1        | -0.742935871 |
| CYTH1     | 0.969295118 | TTC21B       | -0.742435587 |
| HLA-F     | 0.96867305  | NFU1         | -0.742253003 |
| CTBP1-AS1 | 0.968354976 | SHMT2        | -0.742246892 |
| KCTD17    | 0.967257631 | LOC100505876 | -0.742140598 |
| ZDHHC7    | 0.965550058 | ACACA        | -0.742135901 |
| CALM1     | 0.964437192 | COA1         | -0.74102045  |
| ZNF114    | 0.964368957 | C10orf11     | -0.740569025 |
| C18orf25  | 0.963709387 | PRTFDC1      | -0.740557792 |
| SPINT1    | 0.96263788  | F2R          | -0.739746074 |
| HCFC1     | 0.961300503 | LPIN1        | -0.739493862 |
| CLCN7     | 0.960481666 | FIGNL1       | -0.738068367 |
| ZSCAN18   | 0.960095604 | TMIE         | -0.737969812 |
| MICALL1   | 0.959858644 | MPHOSPH9     | -0.737032336 |
| AP2B1     | 0.959421049 | TEX36        | -0.735437773 |
| GGT6      | 0.95841034  | SHBG         | -0.734443611 |
| SCYL2     | 0.958260637 | SNAPC1       | -0.734201673 |
| ATG4A     | 0.957607232 | LOC100505940 | -0.734070586 |
| ZBTB4     | 0.956791855 | UBE2NL       | -0.732956988 |
| CHFR      | 0.956743683 | CMTM7        | -0.731972916 |
| PIP4K2C   | 0.955580574 | GLE1         | -0.731483196 |

|           |             |              |              |
|-----------|-------------|--------------|--------------|
| PER1      | 0.955310512 | C6orf223     | -0.731209227 |
| LEPREL1   | 0.954790904 | RPS10-NUDT3  | -0.730978578 |
| GRAMD4    | 0.954758957 | TMEM48       | -0.730945748 |
| TRANK1    | 0.954687748 | UTP23        | -0.730505389 |
| ETV7      | 0.954687748 | ENOSF1       | -0.729300237 |
| HEATR5A   | 0.953708465 | GATC         | -0.729213397 |
| FOXL2     | 0.95281715  | MRPL19       | -0.728843603 |
| MCF2L     | 0.952311175 | ASB13        | -0.728670391 |
| CLDN1     | 0.951378057 | NUBPL        | -0.726952569 |
| ALDH18A1  | 0.949987442 | LOC286094    | -0.726800188 |
| SPAG9     | 0.947357312 | PTH1R        | -0.726516299 |
| SLC47A2   | 0.945656017 | HAUS2        | -0.72639679  |
| LMO7      | 0.945433775 | LOC100996481 | -0.725563215 |
| PVR       | 0.945250078 | ANO1         | -0.725517915 |
| PANX1     | 0.945233278 | TTC39A       | -0.725145765 |
| SNAP23    | 0.944743949 | NRARP        | -0.724708715 |
| ITGB2     | 0.944373123 | POLR3G       | -0.72332121  |
| SERPINB7  | 0.94395666  | GLRB         | -0.72266853  |
| UPK2      | 0.943222641 | TOM1L1       | -0.722565744 |
| PLS3      | 0.942747961 | WDR76        | -0.722480434 |
| TPST1     | 0.941917893 | DUSP13       | -0.722245958 |
| DKK3      | 0.94174009  | SPP1         | -0.72195241  |
| PPP1R12C  | 0.941731338 | SRFBP1       | -0.720155859 |
| LOC283070 | 0.940798587 | UTP18        | -0.71992123  |
| BRD4      | 0.940783693 | CKAP2        | -0.719516462 |
| DLX3      | 0.939362584 | PRSS12       | -0.719413376 |
| ATG9A     | 0.939032396 | THOC3        | -0.718305027 |
| SOWAHC    | 0.938570441 | FOXJ1        | -0.717707977 |
| PSEN1     | 0.938228977 | OR4D9        | -0.717566792 |
| CD14      | 0.937821885 | PIGV         | -0.717469894 |

|          |             |          |              |
|----------|-------------|----------|--------------|
| RC3H1    | 0.936775381 | TMEM42   | -0.71705929  |
| MGAT1    | 0.936707307 | SLC2A12  | -0.716800831 |
| FAM108B1 | 0.936694173 | PXK      | -0.716534752 |
| WWC2     | 0.936172893 | CCDC101  | -0.715780078 |
| RNMT     | 0.935538858 | RPE      | -0.715592963 |
| HMGXB3   | 0.935321945 | HKDC1    | -0.715007742 |
| ZFYVE27  | 0.934512428 | ACLY     | -0.714945091 |
| KDM5B    | 0.934025491 | TMEM218  | -0.714540122 |
| NDRG4    | 0.933422313 | FOXM1    | -0.713793    |
| SKI      | 0.933069684 | NUDT16P1 | -0.713517161 |
| DVL3     | 0.931512987 | ADORA1   | -0.713485324 |
| CGN      | 0.931268396 | TMEM101  | -0.713479093 |
| VPS37B   | 0.930675461 | SPAG16   | -0.713119155 |
| ACP2     | 0.930195331 | RPS4Y2   | -0.712306066 |
| RASEF    | 0.930014629 | GAR1     | -0.7122795   |
| HYOU1    | 0.928835623 | PDDC1    | -0.711173472 |
| ETS1     | 0.9284572   | SPA17    | -0.710889639 |
| URGCP    | 0.926835278 | PIBF1    | -0.709996435 |
| SLC12A9  | 0.92665004  | ELP6     | -0.709981316 |
| FAM21C   | 0.92637309  | SRSF3    | -0.707399656 |
| MAP3K9   | 0.926160569 | H2AFZ    | -0.70703505  |
| MAGED1   | 0.926033585 | KCNJ18   | -0.705343339 |
| PDLIM1   | 0.923885077 | SMN2     | -0.705302432 |
| MAOA     | 0.923014738 | SIVA1    | -0.704426966 |
| ZNF282   | 0.922173761 | MRPS14   | -0.704008053 |
| DHDDS    | 0.921979212 | MBNL1    | -0.703256122 |
| AP5Z1    | 0.920255018 | MTIF2    | -0.702964333 |
| IFRD1    | 0.919996233 | LRRC69   | -0.702033947 |
| LEPRE1   | 0.919522531 | ANP32A   | -0.701737533 |
| BTBD3    | 0.918498425 | NCAPH2   | -0.700538553 |

|           |             |         |              |
|-----------|-------------|---------|--------------|
| NUAK2     | 0.917471993 | FAM213A | -0.70046264  |
| NDEL1     | 0.917454187 | MAPK10  | -0.700141784 |
| DNAJB9    | 0.917149567 | PDK1    | -0.700047116 |
| KPNA1     | 0.916241566 | AMN1    | -0.698905878 |
| FOXI1     | 0.915294355 | ETFA    | -0.698901203 |
| HRH1      | 0.915275683 | HDGFRP3 | -0.698656862 |
| MORN3     | 0.914657621 | NBR2    | -0.698419163 |
| MTMR1     | 0.913908756 | LIN52   | -0.698056403 |
| CACNB3    | 0.913528841 | TRUB1   | -0.697190227 |
| FAM109A   | 0.913395873 | PSPH    | -0.696121247 |
| BTN2A2    | 0.912921498 | RAB20   | -0.695696844 |
| PAPSS2    | 0.912706528 | TMA16   | -0.695076748 |
| SUN1      | 0.912684318 | PEMT    | -0.694858189 |
| ZHX2      | 0.912052462 | U2AF1   | -0.694795083 |
| TUBA4B    | 0.911751239 | GCA     | -0.694180842 |
| ALCAM     | 0.91115468  | TNNI2   | -0.693160535 |
| CREBRF    | 0.91081481  | SNRPF   | -0.692123419 |
| AVEN      | 0.910651919 | TMEM70  | -0.691996974 |
| LPPR2     | 0.910240574 | CRYL1   | -0.691887674 |
| MAN2A1    | 0.909524958 | TYW3    | -0.691674441 |
| GPATCH2   | 0.909220174 | PCK2    | -0.690229778 |
| RCAN1     | 0.908115082 | CLDN12  | -0.690207702 |
| CTTNBP2NL | 0.907698371 | RPL29   | -0.69019173  |
| VANGL2    | 0.90765412  | EPS8    | -0.689822555 |
| C10orf118 | 0.907000356 | MRPS18A | -0.689693355 |
| POLR2A    | 0.906737909 | PPP1CC  | -0.689363047 |
| KANSL1L   | 0.906608724 | MYBL2   | -0.689267982 |
| FLII      | 0.906208378 | EARS2   | -0.689103716 |
| LURAP1L   | 0.905823765 | DNAJC17 | -0.688980738 |
| ATG16L1   | 0.905450735 | TPM4    | -0.687954293 |



|           |             |         |              |
|-----------|-------------|---------|--------------|
| CYP2E1    | 0.905235867 | FAHD2B  | -0.687649519 |
| INA       | 0.90507133  | SLC1A6  | -0.687051118 |
| AMOTL2    | 0.904442    | OR4K17  | -0.687002979 |
| NEBL      | 0.904180847 | FAM216A | -0.686978927 |
| NRCAM     | 0.9041045   | ALDH1L2 | -0.686689554 |
| GFM1      | 0.903810861 | OR10AD1 | -0.686438056 |
| EDC3      | 0.902984593 | PMM1    | -0.685889055 |
| TRIP12    | 0.902112651 | NUP35   | -0.685670391 |
| PAM       | 0.901996742 | RBBP8NL | -0.685564506 |
| GABARAPL1 | 0.901265304 | DUSP28  | -0.684751253 |
| GPNMB     | 0.900604776 | RGS3    | -0.684393865 |
| PPP1R10   | 0.900230531 | POLR3GL | -0.684271823 |
| STK10     | 0.899661248 | HPGD    | -0.684086275 |
| HERC5     | 0.897745956 | RANBP1  | -0.683150275 |
| FGF12     | 0.895879399 | LARP6   | -0.682925355 |
| HSD17B1   | 0.895302562 | MYL6B   | -0.682003356 |
| YPEL2     | 0.895245737 | CDK2    | -0.681549928 |
| KLF4      | 0.893037524 | NPHP1   | -0.681245953 |
| BMPR2     | 0.892861767 | GJB2    | -0.680980045 |
| MMRN2     | 0.891159867 | PRELID2 | -0.680958088 |
| SESN1     | 0.891117244 | MORN4   | -0.680910956 |
| KLHL15    | 0.890596997 | ATPBD4  | -0.68025313  |
| ZFYVE1    | 0.890252361 | FAM81A  | -0.67822008  |
| ANXA3     | 0.889488881 | WDYHV1  | -0.678195737 |
| GPX8      | 0.887447302 | LRAT    | -0.67817152  |
| CLYBL     | 0.887160089 | SMAD6   | -0.678147302 |
| SAMD4B    | 0.886645328 | GCLM    | -0.678011538 |
| MUC20     | 0.886091421 | MNF1    | -0.677905319 |
| NFKBIB    | 0.885146268 | MRPS9   | -0.677735231 |
| CTSB      | 0.884439483 | MZT1    | -0.677584258 |

|              |             |           |              |
|--------------|-------------|-----------|--------------|
| ITGBL1       | 0.884364316 | ETAA1     | -0.677510783 |
| MYOZ1        | 0.88315043  | ALG9      | -0.677485747 |
| ATP2B4       | 0.882904583 | RNMTL1    | -0.677259146 |
| CCSER2       | 0.882832788 | CARD8     | -0.677251775 |
| ERC1         | 0.882693121 | GATM      | -0.677127217 |
| PPM1K        | 0.882095528 | MYB       | -0.677027575 |
| KIAA1958     | 0.881163827 | BANF1     | -0.67679851  |
| RAB5A        | 0.880376783 | NDUFAF7   | -0.676762317 |
| ARTN         | 0.879721058 | DCLRE1CP1 | -0.676400494 |
| OBSL1        | 0.879176004 | GPN3      | -0.676070561 |
| CD151        | 0.87842032  | FBXO4     | -0.675995587 |
| PDGFB        | 0.876745255 | COA6      | -0.675925078 |
| KLF5         | 0.876546911 | MRPL49    | -0.674395543 |
| ZBTB8A       | 0.876392891 | PTGDS     | -0.673657173 |
| LOC101060404 | 0.875930429 | DCLRE1A   | -0.673581212 |
| ELF1         | 0.874774078 | GNL3      | -0.673470077 |
| AMIGO1       | 0.874190811 | MRPL12    | -0.672944296 |
| PRRG2        | 0.873958166 | PARP2     | -0.672545043 |
| LAMA5        | 0.873354456 | FAH       | -0.672109874 |
| EPS8L1       | 0.872205802 | TMEM55A   | -0.672040295 |
| LIG4         | 0.871290352 | PARPBP    | -0.671839648 |
| FBXO33       | 0.871178443 | AQP7      | -0.671811787 |
| FBXO34       | 0.871043986 | TRIM2     | -0.67161956  |
| PLEKHB2      | 0.870283806 | CCDC15    | -0.67139842  |
| EPHB6        | 0.870273322 | EIF3L     | -0.671109781 |
| ZFP36        | 0.87013156  | ATP5H     | -0.67053478  |
| BST2         | 0.86967695  | PAGE1     | -0.670108541 |
| ACTRT3       | 0.869613525 | COMMD10   | -0.66970891  |
| BTN3A1       | 0.868949492 | ANAPC11   | -0.669580351 |
| GNA15        | 0.868626451 | CLK3      | -0.668936282 |

|                |             |          |              |
|----------------|-------------|----------|--------------|
| ANKRD13C       | 0.868345201 | DMC1     | -0.668821852 |
| C11orf52       | 0.868250452 | SREBF1   | -0.66879897  |
| FKRP           | 0.86818225  | PPIL6    | -0.667710772 |
| SULT2B1        | 0.8670155   | NFIA     | -0.667612304 |
| ANKRD13A       | 0.866109537 | DCAF16   | -0.66751776  |
| VPS53          | 0.866073211 | CNTLN    | -0.667417021 |
| SLC9A1         | 0.865304997 | NPM3     | -0.666842797 |
| SFT2D2         | 0.865070214 | HBE1     | -0.666317619 |
| ITSN1          | 0.865032065 | RHOBTB2  | -0.665503725 |
| SCARA3         | 0.864987263 | SKAP2    | -0.665344483 |
| PACSIN2        | 0.86396306  | NSMCE1   | -0.665261293 |
| SLC35F6        | 0.863652943 | C4orf52  | -0.664874114 |
| USP6NL         | 0.863503923 | KIAA0020 | -0.664633037 |
| UNC45A         | 0.863190559 | HENMT1   | -0.664267364 |
| PROSER2        | 0.862908998 | THRA     | -0.664209415 |
| EIF2AK2        | 0.862766803 | RNPC3    | -0.663778655 |
| PLEKHF1        | 0.862749264 | NXT1     | -0.662652576 |
| TMEM87A        | 0.862565814 | FANCG    | -0.66261268  |
| SYNJ2          | 0.861672635 | ETNK1    | -0.662407781 |
| SLC35F5        | 0.861573739 | SRM      | -0.661920483 |
| AJUBA          | 0.861538192 | RPSA     | -0.661840684 |
| FSCN1          | 0.861433809 | PHPT1    | -0.661834588 |
| KAT2B          | 0.861231691 | CDCA4    | -0.661804967 |
| MGLL           | 0.860939517 | DHPS     | -0.66178266  |
| TRIM8          | 0.860654314 | MANEA    | -0.661668008 |
| UBFD1          | 0.859142281 | MRPL37   | -0.661245257 |
| ZNF44          | 0.858271181 | PPP1R1C  | -0.66122759  |
| C12orf70       | 0.858044512 | NDUFC1   | -0.661048283 |
| ARMCX5-GPRASP2 | 0.857886594 | C19orf43 | -0.661047562 |
| BREA2          | 0.85762212  | TKT      | -0.660408017 |

|          |             |           |              |
|----------|-------------|-----------|--------------|
| HDAC9    | 0.85760012  | LRRC6     | -0.65992706  |
| AP1S3    | 0.857256519 | LOC441455 | -0.659801037 |
| ZNF613   | 0.855687504 | ESD       | -0.659445182 |
| TM7SF3   | 0.855064163 | ZNF598    | -0.659208793 |
| UBR4     | 0.854947515 | C10orf10  | -0.659172215 |
| IL12A    | 0.85467387  | F2RL1     | -0.659079449 |
| CEP170B  | 0.854579431 | LOC646021 | -0.658820021 |
| NOMO2    | 0.853910364 | FAM86B2   | -0.658416433 |
| GRAMD3   | 0.853509059 | IPO5      | -0.65784115  |
| ODF3B    | 0.853363398 | UBXN2A    | -0.657798269 |
| ASAP3    | 0.853044999 | RPUSD4    | -0.657145618 |
| ZNF721   | 0.852804541 | ZIC3      | -0.656128905 |
| CUX1     | 0.852733925 | CCT2      | -0.655786978 |
| ARMC5    | 0.851605236 | CNIH      | -0.655656684 |
| SLC25A25 | 0.8504762   | DCAKD     | -0.655151566 |
| ADAM8    | 0.850326036 | CBS       | -0.655102286 |
| TRIM11   | 0.849654782 | LZIC      | -0.655082923 |
| UBL3     | 0.848483304 | DUSP5     | -0.654910043 |
| WIPI1    | 0.848309498 | C11orf83  | -0.654876399 |
| SOCS2    | 0.846867891 | SPNS3     | -0.654326499 |
| PLXNB2   | 0.846246603 | WDR35     | -0.652318459 |
| NPEPPS   | 0.844603387 | ATP5SL    | -0.651750326 |
| TMEM81   | 0.84459334  | RAB40B    | -0.651719817 |
| FRAT2    | 0.844365943 | EPHX3     | -0.651621307 |
| SWAP70   | 0.84406162  | MED31     | -0.651576569 |
| APOBEC3D | 0.844013194 | GALNT14   | -0.651575508 |
| SYNM     | 0.843936413 | TACO1     | -0.651195037 |
| GDPD3    | 0.843465693 | ST3GAL6   | -0.650875948 |
| ATP9A    | 0.843052819 | HRCT1     | -0.650507387 |
| PVRL4    | 0.842566172 | GSG2      | -0.650482701 |

|          |             |          |              |
|----------|-------------|----------|--------------|
| ARHGEF17 | 0.841806955 | RPL14    | -0.650182194 |
| INTS5    | 0.841633271 | AKR1B1   | -0.649933025 |
| UGGT1    | 0.841618392 | THAP10   | -0.649487309 |
| DENND2A  | 0.84135156  | MMD      | -0.64933495  |
| ABCF3    | 0.84095794  | DNAL1    | -0.648044261 |
| SYTL4    | 0.840854777 | FARS2    | -0.647802524 |
| TSPAN14  | 0.840569158 | GOT1     | -0.647575942 |
| USP47    | 0.840387032 | FAM98C   | -0.647493619 |
| PSME4    | 0.84020289  | NT5C3L   | -0.646663475 |
| RNF40    | 0.839616136 | AUH      | -0.646352768 |
| NAGK     | 0.837486303 | RPS3A    | -0.645796091 |
| PPP1R21  | 0.837405835 | GNPAT    | -0.645768244 |
| PIK3CD   | 0.837001706 | ZZZ3     | -0.644963868 |
| C11orf24 | 0.836238695 | CLPP     | -0.64399906  |
| KIAA1919 | 0.83598149  | C16orf74 | -0.643917936 |
| DOCK10   | 0.835393931 | ZNF511   | -0.643734376 |
| NMNAT2   | 0.834806705 | POLB     | -0.643063889 |
| GIT2     | 0.834174859 | MINOS1   | -0.641862341 |
| NUB1     | 0.833648628 | AHCY     | -0.641556582 |
| PWWP2B   | 0.833474656 | OR2Y1    | -0.641532934 |
| C3orf52  | 0.833378923 | PLK1     | -0.641449088 |
| PPP3CA   | 0.833170043 | EGF      | -0.64099485  |
| CD38     | 0.832441322 | LYRM7    | -0.640770675 |
| PLEKHA1  | 0.832133412 | RNF165   | -0.640212564 |
| HBP1     | 0.831708151 | SLC25A40 | -0.640093003 |
| SIN3B    | 0.831223546 | ZNF277   | -0.639237314 |
| BLNK     | 0.830766902 | ANP32B   | -0.638722714 |
| TLR3     | 0.830300081 | UGT8     | -0.637441457 |
| UNC5A    | 0.82995879  | AKIP1    | -0.636588851 |
| MOSPD1   | 0.829524616 | OXA1L    | -0.63551868  |

|         |             |          |              |
|---------|-------------|----------|--------------|
| ERBB2IP | 0.829186632 | LMNB2    | -0.635352353 |
| ARL14   | 0.829116805 | CHP1     | -0.635283514 |
| ZDHHC17 | 0.828270361 | CC2D2B   | -0.635036407 |
| ATP11A  | 0.827690478 | HMGCR    | -0.634980911 |
| ARMCX3  | 0.827499825 | MTFP1    | -0.634927864 |
| CAPN14  | 0.827472964 | SLC44A1  | -0.634848752 |
| RUSC2   | 0.826722776 | CAPN1    | -0.634666929 |
| OAS2    | 0.826625157 | ATF1     | -0.633960447 |
| DIAPH1  | 0.826454494 | PAFAH1B3 | -0.63317027  |
| PTPRJ   | 0.826326651 | AASDH    | -0.632953047 |
| PHF15   | 0.826057754 | TRMT10B  | -0.632744964 |
| TCF4    | 0.825282417 | CFHR3    | -0.632734121 |
| PPIC    | 0.825276394 | ULK2     | -0.632703874 |
| ZNF296  | 0.82494719  | MRPL22   | -0.632649665 |
| YOD1    | 0.824837547 | RNF32    | -0.632333405 |
| PDCD11  | 0.823199716 | MME      | -0.632233274 |
| SHANK3  | 0.823190946 | IAPP     | -0.632125278 |
| NAGLU   | 0.823182434 | ASL      | -0.632043096 |
| SFXN3   | 0.823175443 | HNRNPA1  | -0.631945053 |
| MFAP2   | 0.823049109 | ESRP1    | -0.631708618 |
| PTPRM   | 0.822909766 | VEPH1    | -0.631102643 |
| DIDO1   | 0.822432873 | RBX1     | -0.630858297 |
| FARP1   | 0.822186508 | H2AFV    | -0.630727635 |
| NOMO1   | 0.821873554 | MASTL    | -0.630318977 |
| KLF11   | 0.821160468 | ULBP1    | -0.629840129 |
| LLGL2   | 0.821125491 | DDX1     | -0.629828745 |
| RIMBP3C | 0.820972544 | CBLC     | -0.629252775 |
| TRAM2   | 0.820647677 | ZNF383   | -0.628170005 |
| TMEM206 | 0.820225906 | AP1S1    | -0.627807394 |
| TRIM47  | 0.820067584 | ISY1     | -0.627479885 |

|          |             |          |              |
|----------|-------------|----------|--------------|
| COBL     | 0.81991332  | DBP      | -0.62744285  |
| CACNG4   | 0.819227183 | VPS52    | -0.62692984  |
| QKI      | 0.818855837 | PPP5C    | -0.626746535 |
| SLC38A10 | 0.818529833 | SMPD2    | -0.626719581 |
| COL1A1   | 0.817459297 | RMND1    | -0.626527804 |
| PSORS1C1 | 0.817266784 | TRNAU1AP | -0.626462779 |
| TAX1BP1  | 0.817078425 | PALD1    | -0.625847721 |
| KIAA1324 | 0.817025961 | ZBTB7B   | -0.625788136 |
| CARD14   | 0.816542785 | CUEDC1   | -0.625091966 |
| NCK2     | 0.815882374 | INTS7    | -0.624878773 |
| SNX33    | 0.815827985 | DLG1     | -0.62451964  |
| B3GALTL  | 0.813642633 | CALB1    | -0.624125451 |
| SLC1A1   | 0.813619269 | AUNIP    | -0.624031168 |
| F11R     | 0.812512237 | PCGF5    | -0.624020115 |
| BCL2L11  | 0.812362079 | RPL4     | -0.622752377 |
| B3GALNT1 | 0.809381151 | DCK      | -0.622635026 |
| HSPH1    | 0.809320961 | MRPL43   | -0.621338385 |
| PIGA     | 0.809253598 | EMG1     | -0.620210331 |
| TBC1D3G  | 0.809218732 | C15orf41 | -0.619944716 |
| VTCN1    | 0.807958262 | POLR3K   | -0.619687472 |
| RNF149   | 0.807615634 | TRIP13   | -0.619645194 |
| UBLCP1   | 0.807592263 | LGMN     | -0.619388211 |
| RELL1    | 0.807181574 | STK32C   | -0.618393357 |
| IKBKE    | 0.8070315   | PPIE     | -0.618053412 |
| SYTL2    | 0.806918304 | KIAA1147 | -0.617776915 |
| PIEZO1   | 0.80663105  | SSBP4    | -0.617541109 |
| KLHL21   | 0.805910208 | ANKRD2   | -0.617210229 |
| USP9X    | 0.805885256 | BCCIP    | -0.616017393 |
| GRK5     | 0.805359103 | ATXN10   | -0.615955091 |
| PHTF2    | 0.804936407 | ARL6IP1  | -0.61586654  |

|          |             |          |              |
|----------|-------------|----------|--------------|
| TMEM106A | 0.804333636 | GTF3A    | -0.615405059 |
| CD109    | 0.80402036  | NOVA1    | -0.614990191 |
| CELSR3   | 0.803689947 | IMPA2    | -0.61473027  |
| SDC4     | 0.803153004 | GMPS     | -0.614709236 |
| GFOD2    | 0.802325394 | PSMG4    | -0.6146537   |
| COL6A2   | 0.802140264 | COPZ1    | -0.614019884 |
| RN7SK    | 0.801879335 | CBR1     | -0.613875819 |
| SETD8    | 0.801701535 | CHRNB1   | -0.613686456 |
| ZGPAT    | 0.801684722 | LCMT1    | -0.613646164 |
| TPRG1L   | 0.801575865 | MNAT1    | -0.613147981 |
| FRAT1    | 0.801552229 | RPL26    | -0.612951933 |
| CYCS     | 0.801337488 | EEF1D    | -0.612943445 |
| REPIN1   | 0.801184745 | CTU2     | -0.612830831 |
| SYNRG    | 0.800611544 | PPIA     | -0.612210018 |
| RELN     | 0.799626044 | RNASEH2B | -0.611807127 |
| DTX3L    | 0.799149805 | PDHB     | -0.611180584 |
| SMG5     | 0.799064157 | TGFBI    | -0.610975971 |
| CRAMP1L  | 0.798399564 | NUDT1    | -0.61080953  |
| SLC7A1   | 0.798348736 | IK       | -0.610477216 |
| MAPRE2   | 0.798189451 | ZFYVE19  | -0.610306597 |
| ZNF45    | 0.796927701 | STK24    | -0.610243245 |
| SALL4    | 0.79682549  | MIIP     | -0.610224184 |
| CASP10   | 0.79668754  | NOL12    | -0.610104022 |
| PDGFRL   | 0.796578707 | CAPN12   | -0.609708895 |
| TM2D3    | 0.796526381 | INSIG2   | -0.608951007 |
| FLNA     | 0.795823721 | DENND4A  | -0.608333625 |
| KRAS     | 0.795642905 | MRPS35   | -0.60809095  |
| LIPH     | 0.795294081 | BCKDHA   | -0.607570345 |
| GABBR2   | 0.79521137  | SRSF10   | -0.607315949 |
| RIMKLB   | 0.79516162  | C8orf40  | -0.60722871  |



|            |             |           |              |
|------------|-------------|-----------|--------------|
| VAT1       | 0.794790271 | MIB1      | -0.606542724 |
| SYNCRIP    | 0.794084434 | FBXW9     | -0.606431164 |
| ZDHHC14    | 0.793977262 | MRPL2     | -0.606219631 |
| SACS       | 0.793411155 | RERG      | -0.606190206 |
| SEMA3B     | 0.793376934 | RCVRN     | -0.605964104 |
| LHFPL3-AS2 | 0.792465306 | C9orf41   | -0.605600087 |
| GOLGA8B    | 0.792154561 | ZWILCH    | -0.605295921 |
| HGS        | 0.791779103 | TNC       | -0.605019937 |
| RNF38      | 0.791301492 | C17orf58  | -0.604896801 |
| ADCK5      | 0.791139639 | SLC37A1   | -0.604456946 |
| SMCR7      | 0.791123203 | IFT80     | -0.60431869  |
| ACTBL2     | 0.790670755 | ALDH3A2   | -0.604318139 |
| KIAA1211L  | 0.789505392 | ZC3HC1    | -0.604249917 |
| MOXD1      | 0.789380114 | LOC729852 | -0.603967959 |
| SNORD52    | 0.789110004 | TCEA1     | -0.603938256 |
| ADAMTSL5   | 0.788589207 | KIF26B    | -0.60386956  |
| SLC12A7    | 0.78850755  | RUVBL2    | -0.603212791 |
| TAOK2      | 0.788260702 | GSS       | -0.603167809 |
| TMEM163    | 0.78672376  | MTHFD1    | -0.602978619 |
| RIPK2      | 0.78616831  | CSTF2     | -0.602760251 |
| CBFA2T2    | 0.786105439 | PRDX2     | -0.60231606  |
| ATP13A1    | 0.785488153 | GTF2H2    | -0.601940661 |
| SLC41A1    | 0.78489208  | AMACR     | -0.601926036 |
| TAOK1      | 0.78476851  | PXMP2     | -0.601658856 |
| JAK1       | 0.784757912 | KIAA1244  | -0.601504905 |
| OSGIN2     | 0.783907289 | ADPRM     | -0.600892329 |
| YIF1A      | 0.783555745 | OR9G4     | -0.600322141 |
| CCBP2      | 0.782862383 | ATM       | -0.600163879 |
| CDK2AP1    | 0.782637101 | C5orf34   | -0.599739576 |
| APP        | 0.782495071 | AQR       | -0.599630916 |

|           |             |          |              |
|-----------|-------------|----------|--------------|
| GAK       | 0.782163095 | MLX      | -0.599615638 |
| YPEL1     | 0.782147592 | RRNAD1   | -0.599233102 |
| PRKD2     | 0.781187606 | SMAD2    | -0.598879135 |
| TMEM234   | 0.781074868 | GPT2     | -0.598275994 |
| ZDHHC5    | 0.781034535 | MAD2L2   | -0.597786947 |
| USP31     | 0.780505634 | POPDC3   | -0.597093134 |
| TMEM45A   | 0.779959815 | ARHGAP18 | -0.596707805 |
| HIST1H2BK | 0.779683688 | TOMM22   | -0.596008577 |
| CDH5      | 0.778298455 | NSMCE2   | -0.595892907 |
| CYP26A1   | 0.77789206  | NDUFB10  | -0.59564152  |
| SLC12A6   | 0.777814922 | GNAI3    | -0.595502728 |
| MEX3D     | 0.776675912 | MACROD1  | -0.595481313 |
| FSHB      | 0.776464579 | SIRT3    | -0.595477464 |
| IFITM3    | 0.775410764 | ZNF573   | -0.595430791 |
| ZFAND5    | 0.775388578 | CCL18    | -0.59521719  |
| RECQL5    | 0.775026632 | POLR2G   | -0.594699613 |
| CHD4      | 0.77408524  | AMD1     | -0.594699004 |
| HSD3B7    | 0.773865269 | MPV17    | -0.594291412 |
| CLDN3     | 0.773728799 | UQCRC2   | -0.592933948 |
| N4BP1     | 0.773248252 | RAD23B   | -0.592415294 |
| CALCOCO1  | 0.772776739 | DFFA     | -0.592408689 |
| ARHGEF37  | 0.772506087 | AAMP     | -0.59234044  |
| FAM96B    | 0.772323806 | ATPIF1   | -0.592297154 |
| TMEM33    | 0.770876976 | EZH2     | -0.591894899 |
| SLC22A23  | 0.770557781 | MEIS2    | -0.591616434 |
| TJP2      | 0.77039853  | SERGEF   | -0.591530882 |
| C2        | 0.770264435 | ZNF558   | -0.591260946 |
| NDRG1     | 0.769733595 | KIAA0146 | -0.591172202 |
| KPNA4     | 0.769427282 | NUP85    | -0.591081263 |
| WDR24     | 0.76926815  | USP7     | -0.591059631 |

|              |             |              |              |
|--------------|-------------|--------------|--------------|
| IRF6         | 0.768339566 | CLK2         | -0.590993584 |
| GBF1         | 0.768204531 | ITGAE        | -0.590937293 |
| JHDM1D       | 0.766606681 | LOC100506737 | -0.590712159 |
| FNBP1        | 0.766355013 | GTF2H4       | -0.5904785   |
| APH1B        | 0.765530326 | FAM195A      | -0.589759075 |
| SLC26A11     | 0.765514644 | HRG          | -0.589516493 |
| FTSJ1        | 0.765273825 | TUBGCP4      | -0.589484703 |
| EPPK1        | 0.765018492 | CCDC104      | -0.588842907 |
| CRIPAK       | 0.764456538 | LRRC58       | -0.588650522 |
| MAD1L1       | 0.76433557  | POLR2I       | -0.588608878 |
| HIP1R        | 0.764312163 | VPS29        | -0.588497025 |
| PLXNB1       | 0.764305242 | GCAT         | -0.588221161 |
| S1PR3        | 0.762383834 | WDR34        | -0.588087012 |
| LDOC1        | 0.761965304 | TIMM21       | -0.58807266  |
| GTF3C1       | 0.760902648 | ELP2         | -0.587362317 |
| FBXL3        | 0.760039009 | MRPL48       | -0.587031842 |
| RNF13        | 0.759978064 | MECR         | -0.586552075 |
| RANGAP1      | 0.759265767 | TRAP1        | -0.586450542 |
| RPS19        | 0.758925401 | ATP11B       | -0.585332939 |
| MORC2        | 0.758832471 | SDHB         | -0.584659046 |
| ISL2         | 0.758098799 | FAM228B      | -0.584612643 |
| MAN2B2       | 0.757767761 | UGP2         | -0.584404917 |
| CCDC102A     | 0.757439712 | MCRS1        | -0.58402215  |
| CYB561D1     | 0.757421247 | IL17RD       | -0.583679854 |
| PLA2G7       | 0.757307512 | ARPC1A       | -0.583531411 |
| C8orf47      | 0.757018465 | MXD4         | -0.583478003 |
| TVP23C-CDRT4 | 0.756949653 | ABCE1        | -0.583132071 |
| CLEC16A      | 0.756824223 | ACADM        | -0.582890241 |
| ZDHHC23      | 0.756784593 | MROH1        | -0.58284143  |
| SPTBN2       | 0.756479269 | SLC52A3      | -0.582728765 |

|          |             |              |              |
|----------|-------------|--------------|--------------|
| UBE2Q2   | 0.755625467 | GEMIN2       | -0.582389958 |
| TNFSF4   | 0.755375987 | ZCCHC7       | -0.582182421 |
| LRFN4    | 0.754870444 | SPATA24      | -0.580798862 |
| DYNC1LI2 | 0.754544494 | LYPD4        | -0.580795443 |
| ANTXR1   | 0.753985132 | TSPAN31      | -0.579914597 |
| TTR      | 0.753566706 | TFF1         | -0.579889729 |
| TMEM144  | 0.753457614 | FARSB        | -0.579628366 |
| ITFG3    | 0.75335782  | CEP89        | -0.579446405 |
| TRAF6    | 0.75323634  | UPK1A        | -0.579135382 |
| UCA1     | 0.752681319 | DLAT         | -0.578988478 |
| UBP1     | 0.751922618 | LOC101060028 | -0.578878069 |
| ADAM10   | 0.750848317 | FEZ1         | -0.578473143 |
| TRIM56   | 0.750837815 | BOLA3        | -0.57844095  |
| COPZ2    | 0.750831432 | PAX6         | -0.578254141 |
| USB1     | 0.750077418 | DDHD2        | -0.577646077 |
| PHF17    | 0.749980342 | TBC1D4       | -0.577484897 |
| ITPRIPL2 | 0.749858261 | CRYZ         | -0.577255681 |
| SLC39A14 | 0.749670958 | FUZ          | -0.576980945 |
| RBPMS    | 0.749512875 | DDAH1        | -0.576846631 |
| GAS2L1   | 0.749441353 | MRPS31       | -0.576451969 |
| TGFBR3   | 0.749424805 | BLOC1S6      | -0.576317502 |
| ARSD     | 0.74891     | IMPDH2       | -0.576300303 |
| PCDHGA12 | 0.748800514 | TIMELESS     | -0.576128432 |
| DGKQ     | 0.748715481 | KIAA0141     | -0.57591988  |
| KCMF1    | 0.748625881 | TRIOBP       | -0.575901992 |
| HCST     | 0.74850914  | HIST1H4B     | -0.575640589 |
| TM2D2    | 0.748388809 | SPEF2        | -0.575484301 |
| CYTH3    | 0.748116002 | FAM211A      | -0.57427879  |
| RUNDC1   | 0.747852125 | PRKCD        | -0.57360149  |
| WBP1L    | 0.747219985 | RAD51C       | -0.573058841 |

|          |             |           |              |
|----------|-------------|-----------|--------------|
| BRWD3    | 0.747212485 | SRXN1     | -0.573054045 |
| SCFD1    | 0.746196747 | C11orf74  | -0.572754941 |
| HS3ST5   | 0.746003086 | SUV420H1  | -0.572159954 |
| SLC6A9   | 0.74564935  | ACOT11    | -0.571804469 |
| TTC17    | 0.745451237 | GSTO1     | -0.571205561 |
| PNPLA2   | 0.744711278 | SNX5      | -0.570731103 |
| TAX1BP3  | 0.744478567 | CLNS1A    | -0.570621278 |
| BTBD7    | 0.74429035  | SRP9      | -0.570500365 |
| SOCS4    | 0.743694698 | ARIH2OS   | -0.569687274 |
| MLXIP    | 0.743404296 | LOC646862 | -0.569368378 |
| ATP2A2   | 0.743291269 | FPGT      | -0.569288361 |
| SETBP1   | 0.743232168 | C11orf1   | -0.569058862 |
| PFKFB2   | 0.743140131 | POLG2     | -0.568690281 |
| YPEL5    | 0.743006693 | PRPSAP1   | -0.56855331  |
| KPNA7    | 0.74296387  | PPP1R9A   | -0.568408137 |
| NLN      | 0.742802424 | KIAA0586  | -0.567912976 |
| SEZ6L2   | 0.742666062 | RPL36     | -0.567353614 |
| RAB37    | 0.742408688 | TMEM223   | -0.567116874 |
| CORO7    | 0.74239074  | TXN2      | -0.567004432 |
| SPIN1    | 0.742024966 | WDHD1     | -0.566992732 |
| SEC31A   | 0.741056713 | UXT       | -0.566949255 |
| NSFL1C   | 0.740689347 | ASRGL1    | -0.566869432 |
| ZRANB1   | 0.74049162  | BCL7C     | -0.566549291 |
| SH3BP4   | 0.739194467 | E2F2      | -0.565809568 |
| STK38    | 0.738627385 | SGOL2     | -0.565652212 |
| TRAF5    | 0.738587137 | NLE1      | -0.565573527 |
| KITLG    | 0.737437252 | MCAT      | -0.565494688 |
| TNFRSF25 | 0.737316754 | RAD23A    | -0.565000114 |
| AMMECR1L | 0.736518213 | NR2C2AP   | -0.5643482   |
| C6orf99  | 0.736251334 | RPL41     | -0.564169003 |

|          |             |            |              |
|----------|-------------|------------|--------------|
| TCIRG1   | 0.735681537 | N6AMT2     | -0.563081259 |
| CTDP1    | 0.73549197  | NUDT21     | -0.562818604 |
| PIGQ     | 0.734876953 | MRPS7      | -0.562281259 |
| TMEM8A   | 0.734748252 | ZNF503-AS2 | -0.562109323 |
| CALR     | 0.734624803 | PMS1       | -0.561972772 |
| EFHD1    | 0.734494803 | EIF2D      | -0.561723248 |
| PROCR    | 0.734464629 | TOP1MT     | -0.560557282 |
| C17orf62 | 0.733715736 | TSPAN5     | -0.560329677 |
| ZNF594   | 0.733677292 | ATP5S      | -0.559973293 |
| TLE2     | 0.73323855  | TMEM69     | -0.559821915 |
| SEMA3A   | 0.732977967 | COQ4       | -0.559680157 |
| UPK3BL   | 0.732674688 | NAT16      | -0.55952865  |
| DTX2     | 0.732020814 | VBP1       | -0.558628999 |
| GAL3ST4  | 0.731619016 | TMEM256    | -0.558558016 |
| FGD6     | 0.73158627  | EPS15L1    | -0.558489543 |
| ATP6AP1  | 0.731352703 | LEF1       | -0.558402587 |
| C12orf23 | 0.731278071 | PPIP5K2    | -0.558025436 |
| RPS6KA1  | 0.730808585 | AS3MT      | -0.556993657 |
| HEXIM2   | 0.730686351 | PHOSPHO2   | -0.556062003 |
| KBTBD7   | 0.730642929 | AGMAT      | -0.555887374 |
| SNORD36C | 0.730578886 | PSMC3IP    | -0.555779174 |
| PSME2    | 0.730312701 | ACTR3B     | -0.555629797 |
| MUM1     | 0.730115472 | CTDSPL2    | -0.555419589 |
| TUG1     | 0.729839544 | TAMM41     | -0.555390687 |
| MFSD7    | 0.7294452   | MORN2      | -0.555319676 |
| TLCD2    | 0.72941764  | NPHP4      | -0.554858882 |
| SHOC2    | 0.729368341 | CSNK1G2    | -0.554839151 |
| OR111    | 0.728928836 | EIF2B1     | -0.554671902 |
| CKAP4    | 0.728836855 | FAM189B    | -0.554399545 |
| EHMT1    | 0.728445934 | DTWD2      | -0.554236978 |

|          |             |           |              |
|----------|-------------|-----------|--------------|
| PRKAG2   | 0.728244375 | FZD2      | -0.554119351 |
| MYOF     | 0.728121278 | ATL2      | -0.552907051 |
| USP11    | 0.727548951 | YY2       | -0.552809654 |
| TPM1     | 0.727502251 | LYRM5     | -0.552379284 |
| ENTHD2   | 0.7271014   | CCDC176   | -0.552111673 |
| GLUL     | 0.726991746 | SLC9B2    | -0.55177153  |
| PPP1R15A | 0.726727967 | EIF4EBP1  | -0.551626413 |
| TESK1    | 0.726623378 | IFT27     | -0.551314258 |
| GSTK1    | 0.726277575 | SPECC1    | -0.551254564 |
| LGR4     | 0.725901542 | CMTM8     | -0.550459518 |
| LACTB    | 0.725791012 | BRIX1     | -0.550422809 |
| ATF5     | 0.725768975 | DGUOK     | -0.550140583 |
| CNPPD1   | 0.725025661 | USP8      | -0.549800677 |
| PAIP1    | 0.724959493 | KRTAP20-1 | -0.549604132 |
| SLC35F3  | 0.724918557 | PQLC3     | -0.549441539 |
| ESRP2    | 0.724531476 | ASCC1     | -0.548940915 |
| AAK1     | 0.72360648  | NSL1      | -0.54842588  |
| POLR3A   | 0.722638107 | EIF3H     | -0.548254962 |
| C7orf61  | 0.722444021 | SIRT2     | -0.548236102 |
| BTBD9    | 0.722291786 | MTAP      | -0.547901721 |
| FUT3     | 0.721849643 | MRPL4     | -0.547629039 |
| TIAM2    | 0.721586009 | C16orf91  | -0.547388583 |
| CCL28    | 0.721499427 | LAS1L     | -0.546845165 |
| LRRC37A3 | 0.721393256 | SIGLEC9   | -0.546795014 |
| BCLAF1   | 0.719901755 | THOP1     | -0.546646356 |
| MAPT     | 0.719669576 | RPS3      | -0.545872828 |
| STK36    | 0.719638344 | RHCE      | -0.54586463  |
| GOSR2    | 0.719390524 | TFR2      | -0.545338011 |
| TTC39C   | 0.719384896 | PLRG1     | -0.545187429 |
| ITM2B    | 0.719336211 | OAZ3      | -0.544706937 |

|          |             |           |              |
|----------|-------------|-----------|--------------|
| ZXDB     | 0.719052742 | SDHD      | -0.544642141 |
| KIAA0907 | 0.718922972 | LCE4A     | -0.544474766 |
| APBB3    | 0.718889335 | MYCBP     | -0.544470239 |
| ZNF777   | 0.718479253 | ATPAF1    | -0.544395495 |
| TMPPE    | 0.718390785 | C21orf119 | -0.544378834 |
| RNF145   | 0.717750454 | CNN3      | -0.544240693 |
| SRRM1    | 0.717638764 | KIAA1549L | -0.544022318 |
| CATSPER1 | 0.716937597 | COASY     | -0.543630405 |
| MYO1C    | 0.716898678 | TNFSF9    | -0.543600206 |
| IQSEC1   | 0.716861573 | C12orf10  | -0.542516164 |
| PPP1R15B | 0.716811764 | CARS      | -0.542084717 |
| RPS6KL1  | 0.716768025 | BCKDHB    | -0.542076189 |
| ZBTB45   | 0.715686334 | EXTL2     | -0.541855639 |
| TMEM120B | 0.714508236 | NAA15     | -0.541818719 |
| MSANTD2  | 0.714116717 | OSBPL1A   | -0.541515062 |
| JRKL     | 0.714074989 | NAP1L1    | -0.541006251 |
| CXorf28  | 0.713828836 | CHKA      | -0.540718026 |
| UBE2H    | 0.713756371 | SMC6      | -0.540641847 |
| PARD3B   | 0.713723867 | COQ5      | -0.540524158 |
| SAFB2    | 0.713698225 | GBE1      | -0.540017523 |
| CDV3     | 0.713427726 | C12orf52  | -0.53939191  |
| GOLGA1   | 0.713383271 | PRSS16    | -0.539365945 |
| TMPRSS7  | 0.713286738 | NDUFV1    | -0.538704134 |
| MEPCE    | 0.713019713 | ATP5G2    | -0.538562716 |
| CYBRD1   | 0.712882144 | FBP1      | -0.538401506 |
| FHOD1    | 0.712545235 | NFIB      | -0.538242415 |
| CXCL1    | 0.712357751 | NMRK2     | -0.538132882 |
| TAF11    | 0.71220197  | ZC3H6     | -0.537935542 |
| TNF      | 0.711771014 | SRP68     | -0.537524356 |
| LPHN1    | 0.711529291 | GGCT      | -0.537371662 |



|           |             |           |              |
|-----------|-------------|-----------|--------------|
| EHD4      | 0.710966835 | AGPAT5    | -0.537277883 |
| ESYT1     | 0.710910513 | MCM3      | -0.537182121 |
| PDPR      | 0.710425165 | TICRR     | -0.536550773 |
| SEC16A    | 0.709301555 | MLH1      | -0.536523502 |
| TP53BP1   | 0.709202903 | AP1AR     | -0.536162414 |
| PLSCR3    | 0.709151517 | FAM86DP   | -0.536080207 |
| LIFR      | 0.709078713 | LDHD      | -0.536042115 |
| MSRB3     | 0.708841364 | XK        | -0.535995829 |
| HSPA1B    | 0.708797948 | BCL2L12   | -0.535959075 |
| MOB3C     | 0.708366445 | HIAT1     | -0.535882834 |
| C1orf63   | 0.708070384 | OR8I2     | -0.535747554 |
| FAM53C    | 0.706960378 | HOXA11    | -0.535586884 |
| NCS1      | 0.706930691 | COQ10A    | -0.535532282 |
| FAM84B    | 0.706708495 | HMGCL     | -0.535015446 |
| PLEKHM1   | 0.706669106 | C12orf56  | -0.534691078 |
| GOLGA2    | 0.706284922 | TATDN3    | -0.534302281 |
| PRR13     | 0.705796124 | ABCD3     | -0.534180067 |
| NPY2R     | 0.705064892 | WDR74     | -0.534173901 |
| TJP1      | 0.704942756 | EIF3D     | -0.533575544 |
| C14orf178 | 0.704756365 | LRR1      | -0.533546637 |
| KRT7      | 0.704403683 | ACSM3     | -0.533505593 |
| SLC35G3   | 0.704375947 | SLBP      | -0.533472466 |
| RIC8B     | 0.70405314  | EXOC6     | -0.533434243 |
| SNX8      | 0.703987528 | CDKL3     | -0.532758866 |
| KLHL18    | 0.70390972  | LINC00656 | -0.532135192 |
| SECISBP2L | 0.703144863 | C16orf59  | -0.532101959 |
| LGALS3    | 0.702881098 | B3GNT1    | -0.531965042 |
| RIPK1     | 0.702318416 | SSR2      | -0.531951304 |
| ZC2HC1A   | 0.702123254 | INTS8     | -0.531337758 |
| ZNF566    | 0.701880121 | UFM1      | -0.530854621 |

|            |             |            |              |
|------------|-------------|------------|--------------|
| TOR1AIP2   | 0.701665763 | PRPF19     | -0.530799287 |
| MAP2K3     | 0.701524074 | P2RY6      | -0.530520502 |
| KDM3A      | 0.701177329 | OSCP1      | -0.530475918 |
| GTF2IRD2P1 | 0.699728413 | ATP5L      | -0.530132166 |
| COX6B2     | 0.699459566 | MRS2P2     | -0.529274739 |
| COPA       | 0.699291196 | KCNS3      | -0.529128381 |
| DNAH5      | 0.699012519 | C12orf65   | -0.528858467 |
| APOBEC3A   | 0.69900126  | CCDC138    | -0.528665498 |
| BCAT1      | 0.698896026 | GADD45GIP1 | -0.52824357  |
| FAM127C    | 0.698727398 | PNP        | -0.527998769 |
| BOK        | 0.698610806 | CYP27C1    | -0.527637873 |
| SRRM2      | 0.698528851 | KRTCAP3    | -0.527493159 |
| GNAI1      | 0.698263798 | NET1       | -0.527463236 |
| C1RL       | 0.698112562 | HMBS       | -0.526967575 |
| UBE2B      | 0.697987669 | CLPSL1     | -0.526421748 |
| DSE        | 0.697336555 | CAPS       | -0.526383891 |
| MYO6       | 0.697089621 | TBXA2R     | -0.526287103 |
| DENND1A    | 0.696401072 | HNRNPA2B1  | -0.52617155  |
| SAMD4A     | 0.69597561  | DFNB59     | -0.526152285 |
| DTNB       | 0.694760629 | UACA       | -0.526116229 |
| MUC16      | 0.69436354  | TMEM18     | -0.52583267  |
| YEATS2     | 0.694275053 | FADS2      | -0.525832275 |
| ESRRA      | 0.694231692 | DCPS       | -0.525731055 |
| LRRC61     | 0.694036241 | ZCCHC9     | -0.525502363 |
| SEL1L3     | 0.693687218 | AMZ2       | -0.525443308 |
| XPO6       | 0.693160823 | SNX18      | -0.525423567 |
| HPS1       | 0.693097808 | RBMX2      | -0.525351783 |
| PTPRF      | 0.69282971  | MPHOSPH6   | -0.525310873 |
| CEBPD      | 0.692197743 | SLC41A3    | -0.525299405 |
| BICD2      | 0.691966323 | PDE8B      | -0.524933393 |

|        |             |          |              |
|--------|-------------|----------|--------------|
| TCP1   | 0.691813359 | SMARCB1  | -0.524751444 |
| PNPLA8 | 0.691771599 | ATG16L2  | -0.523772366 |
| UBXN7  | 0.690013868 | RPL38    | -0.523571415 |
| RNASEL | 0.689341121 | MOBP     | -0.52326468  |
| IFI30  | 0.689231144 | SEPT9    | -0.522593597 |
| DIRC2  | 0.688855985 | OSTC     | -0.522350502 |
| XPC    | 0.688599071 | SLC25A3  | -0.522205005 |
| NCLN   | 0.688283333 | C14orf1  | -0.522195968 |
| GANAB  | 0.688250132 | PEX11A   | -0.521365345 |
| SUFU   | 0.687927528 | PCED1B   | -0.521352091 |
| SNX2   | 0.687909489 | HCAR3    | -0.521330895 |
| EIF4G3 | 0.687036882 | ANP32E   | -0.520988994 |
| SCARF2 | 0.686936019 | EIF4E    | -0.520933616 |
| OVOL1  | 0.685672183 | TCFL5    | -0.520886521 |
| RNF31  | 0.685505817 | UHRF1BP1 | -0.520633627 |
| FAM21A | 0.685486906 | CHCHD3   | -0.5200538   |
| ZNF229 | 0.685179831 | ANGPT1   | -0.519563609 |
| DDX24  | 0.684493083 | ADK      | -0.518903311 |
| TFPI   | 0.684358604 | SUCLG1   | -0.518325173 |
| TMEM51 | 0.683931189 | BTF3L4   | -0.518256251 |
| ZBTB42 | 0.68381116  | PRLR     | -0.517986967 |
| SNX16  | 0.683408902 | TFB1M    | -0.517841794 |
| STT3A  | 0.682930974 | PHF6     | -0.517584409 |
| ZNF197 | 0.682925751 | PIGU     | -0.517051726 |
| SYMPK  | 0.682746691 | CARD10   | -0.516710232 |
| PGAP3  | 0.682406353 | C19orf54 | -0.516307982 |
| CCL3L1 | 0.68233234  | CENPL    | -0.516163176 |
| CXCR7  | 0.68231981  | THOC7    | -0.516149728 |
| CTSS   | 0.681096175 | CASC2    | -0.516085646 |
| HMOX1  | 0.680927243 | OSTCP1   | -0.515876406 |

|          |             |          |              |
|----------|-------------|----------|--------------|
| EGFR     | 0.680731919 | LGALS8   | -0.515438587 |
| CCDC57   | 0.680469471 | STMN1    | -0.515163639 |
| ZCCHC6   | 0.680422048 | ENOPH1   | -0.515019208 |
| CNNM3    | 0.680176902 | RPS5     | -0.514942803 |
| NOL6     | 0.679523365 | SHB      | -0.514935338 |
| CYP27B1  | 0.679258791 | PSPC1    | -0.514699989 |
| ZNF264   | 0.679076563 | NR2F6    | -0.514637804 |
| DSTYK    | 0.678986613 | TCAIM    | -0.514453288 |
| JUND     | 0.678951041 | DNAAF3   | -0.514368139 |
| SPEN     | 0.678598318 | KIAA1586 | -0.514039217 |
| TMEM54   | 0.678512112 | MDP1     | -0.513462064 |
| REV3L    | 0.678474533 | MMACHC   | -0.513446673 |
| LDB3     | 0.677857509 | EIF3K    | -0.51326912  |
| ACIN1    | 0.677465335 | CYB5R2   | -0.513104017 |
| SERPIN1  | 0.676794848 | CEP78    | -0.513061329 |
| TMEM173  | 0.676631926 | TIMM9    | -0.512932409 |
| C1orf198 | 0.676373652 | SCAPER   | -0.512457657 |
| DCUN1D2  | 0.676286563 | SELRC1   | -0.512412226 |
| RARRES1  | 0.675973251 | CDPF1    | -0.511862342 |
| SLC7A6   | 0.675246209 | ASGR1    | -0.511599941 |
| HINFP    | 0.675148375 | BUB3     | -0.511507502 |
| CARD6    | 0.67502976  | CAPG     | -0.511430988 |
| PARP10   | 0.673800858 | RACGAP1  | -0.51132645  |
| TOM1L2   | 0.673516142 | FAM169A  | -0.510974035 |
| RAB2B    | 0.673509686 | ALDH5A1  | -0.510693034 |
| HLA-C    | 0.673323252 | PCGF6    | -0.510648112 |
| NGRN     | 0.673153534 | MAPK3    | -0.510416703 |
| CFL2     | 0.671722153 | SNRNP70  | -0.510082923 |
| IL12RB1  | 0.67150535  | R3HCC1   | -0.510069734 |
| RHOBTB1  | 0.671297957 | RAB3B    | -0.509897399 |

|          |             |         |              |
|----------|-------------|---------|--------------|
| MBTPS1   | 0.671166479 | ZMAT5   | -0.509838047 |
| VAV1     | 0.671031338 | RAB28   | -0.509751378 |
| KRT6B    | 0.670811682 | RFXANK  | -0.509281405 |
| ABL2     | 0.66981538  | KCNN4   | -0.508837131 |
| CSNK2A2  | 0.669622847 | POLD3   | -0.50868512  |
| ABLIM1   | 0.66890451  | NOC3L   | -0.506638783 |
| FAM160B1 | 0.667817768 | NUDCD2  | -0.506002846 |
| JARID2   | 0.667783304 | TMEM182 | -0.505893409 |
| METTL1   | 0.667739906 | ESCO2   | -0.505866119 |
| EPN2     | 0.667602372 | METTL15 | -0.505842349 |
| RNF216   | 0.667174373 | ITGB4   | -0.505824657 |
| NTN1     | 0.666064773 | PIH1D1  | -0.50569089  |
| FSTL4    | 0.666061695 | RAB11B  | -0.505635717 |
| FAM179A  | 0.665885209 | ZMYM5   | -0.505623438 |
| CA11     | 0.665849442 | BTF3    | -0.505355537 |
| PSG2     | 0.665443073 | TIMP1   | -0.504884835 |
| ZNF83    | 0.664806644 | TMEM245 | -0.504500804 |
| B2M      | 0.664399913 | CBX3    | -0.504380247 |
| ENO4     | 0.664205033 | RANGRF  | -0.504356342 |
| MAP4K3   | 0.664086015 | FTH1    | -0.504041954 |
| PRSS53   | 0.662548454 | COX4I2  | -0.503752608 |
| PLEKHM2  | 0.662207989 | C3orf14 | -0.503208499 |
| TRAPPC2  | 0.661831048 | TOMM70A | -0.502090515 |
| COL4A3BP | 0.661739979 | STRADB  | -0.50184109  |
| RAB22A   | 0.661590512 | ATF4    | -0.50171862  |
| GPBP1L1  | 0.661471637 | IFT74   | -0.501466644 |
| BTN3A3   | 0.661454957 | AVL9    | -0.501321759 |
| RC3H2    | 0.661419504 | NDUFV3  | -0.501082374 |
| DENND4C  | 0.661139131 | CYP4F11 | -0.501021902 |
| IL11     | 0.661105441 | FOXQ1   | -0.500960931 |

|          |             |                |              |
|----------|-------------|----------------|--------------|
| HYAL4    | 0.660969969 | RNF219         | -0.500889692 |
| DCAF8    | 0.660851135 | PDE9A          | -0.500848536 |
| CYP19A1  | 0.659863818 | MAGEA10-MAGEA5 | -0.500716832 |
| UPF1     | 0.659783304 | TMEM126B       | -0.500656571 |
| UBAP2    | 0.659631029 | NTAN1          | -0.500618512 |
| TBKBP1   | 0.65926149  | FAM172A        | -0.500534071 |
| CREB3    | 0.659013754 | ETFB           | -0.500286149 |
| HOPX     | 0.658812714 | SH2D3A         | -0.499992879 |
| DHX37    | 0.658521645 | MRPL3          | -0.499969969 |
| OSTF1    | 0.657999157 | DANCR          | -0.499880805 |
| CNEP1R1  | 0.657956357 | RPL5           | -0.499697691 |
| GPX7     | 0.657889997 | SSRP1          | -0.499523609 |
| ERV3-1   | 0.657821825 | APRT           | -0.499437617 |
| DNM2     | 0.657673622 | THUMPD3        | -0.499401549 |
| TSPAN9   | 0.657324372 | SERTAD4        | -0.499309493 |
| CNNM4    | 0.657289996 | NTRK2          | -0.499188185 |
| LEMD2    | 0.657203153 | EHF            | -0.49915768  |
| RHPN2    | 0.655832499 | SFT2D3         | -0.499044512 |
| DISP1    | 0.65556389  | HLA-DOB        | -0.498932931 |
| NKTR     | 0.655556091 | UBE2I          | -0.498749768 |
| NUMBL    | 0.655554071 | ARMCX3-AS1     | -0.498680306 |
| UPF2     | 0.654539849 | EIF2B3         | -0.498185423 |
| OCIAD2   | 0.654500867 | NACA           | -0.497969282 |
| TACSTD2  | 0.654450553 | PGLYRP2        | -0.49780895  |
| RCOR3    | 0.653949628 | THYN1          | -0.497550438 |
| SETD1B   | 0.653925626 | SEC22A         | -0.497452451 |
| HLA-DRB1 | 0.653371347 | CASK           | -0.496980237 |
| C1orf226 | 0.653241506 | LRRC8B         | -0.496975224 |
| MTM1     | 0.652841049 | GSTA5          | -0.496855421 |
| RXRB     | 0.652788684 | AIMP1          | -0.496452481 |

|              |             |          |              |
|--------------|-------------|----------|--------------|
| ARIH1        | 0.652612325 | PINX1    | -0.49637252  |
| SERPINH1     | 0.652576118 | PRKRIR   | -0.496277567 |
| RALGDS       | 0.651554016 | SH3BP2   | -0.496152734 |
| TMEM167A     | 0.651547576 | B9D1     | -0.495683928 |
| HYI          | 0.651507641 | IDH2     | -0.495571506 |
| CALU         | 0.651459457 | CHRNA5   | -0.495298541 |
| SLPI         | 0.651364308 | ANKRD32  | -0.494663958 |
| VILL         | 0.650436523 | VIP      | -0.49445203  |
| TLN1         | 0.649769772 | NME6     | -0.494154788 |
| FHL2         | 0.649586896 | EXOSC7   | -0.493132368 |
| TGIF1        | 0.649124231 | AGER     | -0.493047782 |
| IDO1         | 0.648992559 | SLC18B1  | -0.492962874 |
| ZNF75A       | 0.648505647 | PPIL3    | -0.492930827 |
| ZNF407       | 0.648414879 | ALYREF   | -0.492318975 |
| TNNT1        | 0.648258476 | LENG1    | -0.492293599 |
| KCNH2        | 0.647740315 | NUPR1    | -0.491923498 |
| SLC15A2      | 0.647660593 | DNPH1    | -0.491709017 |
| ARFGEF2      | 0.647429633 | STARD10  | -0.491563345 |
| DDR1         | 0.647069123 | MTERFD1  | -0.491420732 |
| SASH1        | 0.646881879 | KIAA1430 | -0.491242863 |
| LOC100653247 | 0.646335442 | MIS18A   | -0.490511206 |
| GRIN2D       | 0.646290692 | MED18    | -0.490205377 |
| ATRN         | 0.64623957  | S100A4   | -0.489976086 |
| DDX58        | 0.645859927 | GALNT3   | -0.489596913 |
| XPR1         | 0.645733725 | KAT8     | -0.489547606 |
| ZNF468       | 0.64542436  | THAP7    | -0.48935731  |
| CPT1B        | 0.644835749 | GCDH     | -0.488899075 |
| IER2         | 0.644210602 | CDK4     | -0.488288154 |
| DUSP7        | 0.644145678 | ZBED3    | -0.488044014 |
| LPIN2        | 0.644114056 | MLST8    | -0.487238804 |

|           |             |          |              |
|-----------|-------------|----------|--------------|
| ITFG1     | 0.643999656 | TCEA2    | -0.487139314 |
| KLHL24    | 0.643989246 | CEP120   | -0.486991813 |
| RELA      | 0.643888088 | LACTB2   | -0.486841127 |
| FBXL19    | 0.643761832 | PYCR2    | -0.486480432 |
| NUDCD3    | 0.643697974 | SSH3     | -0.486471582 |
| ARVCF     | 0.643325022 | GJC1     | -0.486383278 |
| NUMA1     | 0.643077798 | TUBG1    | -0.486247745 |
| CYP1B1    | 0.642451699 | RPL34    | -0.486139886 |
| COX19     | 0.642233466 | ECT2     | -0.486043126 |
| PIK3C2B   | 0.642092041 | STEAP3   | -0.485958776 |
| SNIP1     | 0.641931747 | TAF1     | -0.485773616 |
| RAB3IP    | 0.641745809 | RORC     | -0.485722704 |
| SAP30L    | 0.641463053 | TCEANC   | -0.485568019 |
| FAM134C   | 0.640842549 | GLOD4    | -0.485520797 |
| FKBPL     | 0.640552966 | KATNA1   | -0.485512686 |
| TMEM30A   | 0.640485439 | PTGR2    | -0.484974325 |
| TIPARP    | 0.640474924 | NOC4L    | -0.48491732  |
| PPP4R1    | 0.640317216 | LIG1     | -0.484530993 |
| CSF2RA    | 0.640152616 | CARM1    | -0.483901425 |
| KIAA1598  | 0.639974556 | HAUS3    | -0.483850129 |
| SIX5      | 0.639965639 | ATP6V1E2 | -0.483416872 |
| EFEMP2    | 0.639436951 | SULF2    | -0.48335108  |
| SMO       | 0.63925487  | FANCD2   | -0.48318101  |
| SEMA3F    | 0.637282494 | TNFSF10  | -0.483157602 |
| LINC00324 | 0.636953979 | NF1      | -0.483044395 |
| RBPM2     | 0.636945651 | PPP1R35  | -0.483030361 |
| SETD7     | 0.636280903 | NMRAL1   | -0.482945889 |
| LCK       | 0.636244877 | GCFC2    | -0.482845053 |
| CDK16     | 0.635504677 | SLC35E3  | -0.482617865 |
| GALK1     | 0.635315541 | GGPS1    | -0.482495619 |



|           |             |              |              |
|-----------|-------------|--------------|--------------|
| PIP5K1A   | 0.635217507 | LSM4         | -0.482474572 |
| ABCB8     | 0.635020299 | IAH1         | -0.48238412  |
| PGM2L1    | 0.635020299 | SDHAF1       | -0.481760499 |
| GBGT1     | 0.634992834 | PNKP         | -0.481654634 |
| CLIC3     | 0.634714242 | ZNF101       | -0.481613718 |
| BAP1      | 0.634533677 | MRPL35       | -0.480901279 |
| DGAT1     | 0.634517039 | PFDN1        | -0.480872932 |
| RNF121    | 0.634388219 | LOC100505771 | -0.480654646 |
| JMJD4     | 0.633875121 | ARL13B       | -0.480625583 |
| PXDC1     | 0.633123378 | EXOSC1       | -0.480585912 |
| SLU7      | 0.633112273 | RBL1         | -0.480345566 |
| MED10     | 0.632982815 | LRPPRC       | -0.480341166 |
| BRD2      | 0.632780633 | FAHD2A       | -0.480337978 |
| CTIF      | 0.632767014 | USP39        | -0.480143173 |
| NCDN      | 0.632377841 | HP07349      | -0.48009051  |
| PRRC2C    | 0.632147573 | OR8H1        | -0.479962739 |
| MYZAP     | 0.631947427 | MRPL15       | -0.479341558 |
| C17orf103 | 0.631929938 | EIF3IP1      | -0.478843844 |
| CHERP     | 0.631609426 | TARBP1       | -0.478400379 |
| NAA60     | 0.630932328 | SLC25A5      | -0.478180294 |
| CHST15    | 0.630800215 | CS           | -0.47810562  |
| COPB2     | 0.630785549 | MRPL34       | -0.477986694 |
| STK4      | 0.630635233 | CD68         | -0.477853039 |
| TRPC4     | 0.630451715 | RPL36A       | -0.477847921 |
| TBC1D9B   | 0.630364377 | MGME1        | -0.477610272 |
| ARID1B    | 0.630229675 | POLI         | -0.477567997 |
| GRHL1     | 0.630162561 | TRIQQ        | -0.477306762 |
| BTG1      | 0.630006306 | PPFIA3       | -0.477197596 |
| SDCBP2    | 0.629817631 | RINT1        | -0.477184166 |
| LZTS2     | 0.62965829  | INTU         | -0.47708769  |

|          |             |          |              |
|----------|-------------|----------|--------------|
| DYNLRB1  | 0.62962135  | NDUFS4   | -0.476952709 |
| RTKN     | 0.629552874 | PDCD6    | -0.476571736 |
| ALDH16A1 | 0.629291117 | PPP2R3C  | -0.476110498 |
| SLC35E1  | 0.628644526 | MBD4     | -0.476025299 |
| BRSK1    | 0.62857419  | ZNF239   | -0.475582042 |
| PTK7     | 0.628301451 | ZNF426   | -0.475160988 |
| PDXDC1   | 0.628231534 | ANKRD26  | -0.475078617 |
| NKX3-1   | 0.627880722 | MAP1LC3A | -0.474933797 |
| BRD3     | 0.627719839 | C17orf75 | -0.474878033 |
| SH3BP5L  | 0.627685308 | SYBU     | -0.474288161 |
| DTNBP1   | 0.626873714 | MBD2     | -0.474178239 |
| KLK10    | 0.625742591 | CCDC62   | -0.473817628 |
| FAM89B   | 0.625444125 | HLA-DMA  | -0.473649746 |
| OS9      | 0.625335939 | NAA25    | -0.473580879 |
| TDRD7    | 0.62527292  | SAP30    | -0.473497823 |
| STRIP1   | 0.625236105 | CNBP     | -0.473417837 |
| OTUD5    | 0.625081109 | MRPL45   | -0.473134762 |
| ZFC3H1   | 0.624971347 | CNOT7    | -0.472395632 |
| CLSTN1   | 0.624636382 | LDHC     | -0.472123875 |
| DENND5B  | 0.624401563 | COG7     | -0.472096078 |
| FGFR1OP2 | 0.624375872 | CNIH4    | -0.471870902 |
| ARHGEF5  | 0.624098611 | LARP1B   | -0.471074639 |
| ZDHHC18  | 0.624012047 | C20orf96 | -0.470969362 |
| TRAM1    | 0.623859422 | SNTB2    | -0.470643992 |
| ZNF765   | 0.623753969 | TIMM44   | -0.470498579 |
| RCBTB2   | 0.623734768 | ACOT13   | -0.470441801 |
| GTPBP4   | 0.623659789 | MRE11A   | -0.470307637 |
| TP53INP1 | 0.623535491 | SMIM3    | -0.470216571 |
| USP19    | 0.622997644 | GEN1     | -0.470178714 |
| LAPTM4A  | 0.622712702 | VDAC1    | -0.469751602 |

|           |             |           |              |
|-----------|-------------|-----------|--------------|
| FASTKD5   | 0.622584831 | BYSL      | -0.469597754 |
| SELL      | 0.622012028 | FUS       | -0.469576192 |
| ZNF606    | 0.621744486 | ATP5G1    | -0.469523599 |
| LOC151760 | 0.621657737 | PIM1      | -0.469450214 |
| SH3RF1    | 0.620862165 | EIF2AK4   | -0.469321155 |
| CTCF      | 0.620353754 | GTF3C5    | -0.468958621 |
| NBN       | 0.61851344  | RUVBL1    | -0.468421111 |
| USP35     | 0.618448991 | HLCS      | -0.468235247 |
| AMN       | 0.618272375 | LYPLAL1   | -0.467900386 |
| USP40     | 0.618226958 | SLC30A5   | -0.467780782 |
| RABGEF1   | 0.617684836 | FAM115A   | -0.467737143 |
| SMARCA4   | 0.617627638 | BATF      | -0.467628005 |
| ADM       | 0.617605054 | SQRDL     | -0.467282112 |
| MMP9      | 0.617577665 | TRIT1     | -0.467086835 |
| PAPSS1    | 0.617200381 | SYTL3     | -0.467055754 |
| TNPO2     | 0.616937896 | NPPB      | -0.467049946 |
| NFKB2     | 0.616937896 | SNCA      | -0.467033261 |
| LOC90246  | 0.616627501 | TIPIN     | -0.466978102 |
| FBXO6     | 0.616540776 | TXNDC16   | -0.466964764 |
| TM9SF4    | 0.616480178 | FBLL1     | -0.466763324 |
| DYSF      | 0.616297993 | AGFG1     | -0.466629177 |
| MLEC      | 0.616287546 | SRSF1     | -0.466008991 |
| EPB41L4A  | 0.616209213 | PIH1D2    | -0.465781122 |
| CD163L1   | 0.615819433 | ITGA3     | -0.465555659 |
| NAT8L     | 0.615715595 | LOC415056 | -0.465148981 |
| SLC35E4   | 0.615598741 | MRPS33    | -0.464799522 |
| NFE2L1    | 0.615257115 | TOMM7     | -0.464754428 |
| MFAP3     | 0.615245131 | RAPGEF5   | -0.464727124 |
| FLNB      | 0.615071978 | HDAC2     | -0.464604046 |
| PGRMC2    | 0.614811527 | RNASE1    | -0.464487454 |

|          |             |          |              |
|----------|-------------|----------|--------------|
| MEF2D    | 0.614220184 | FAU      | -0.463899056 |
| DPP3     | 0.614083364 | HMG20B   | -0.463874457 |
| GRIPAP1  | 0.613685146 | PPHLN1   | -0.463608115 |
| CNKSRI   | 0.61355517  | NOP56    | -0.463596588 |
| POGK     | 0.613336964 | CEACAM1  | -0.46339838  |
| SOCS3    | 0.613336576 | NARF     | -0.463323274 |
| TRPS1    | 0.612681294 | PLK1S1   | -0.463115165 |
| MLL3     | 0.612269244 | ARNTL    | -0.462348363 |
| SRPX2    | 0.610986534 | TRAPPC6A | -0.462238083 |
| SULT1C3  | 0.61066456  | UCK2     | -0.462147045 |
| SH3BGRL3 | 0.61004837  | ANAPC16  | -0.462126144 |
| RYBP     | 0.60997579  | CCDC115  | -0.462086873 |
| SCAP     | 0.609901553 | RAD1     | -0.462016532 |
| DPY19L1  | 0.609786972 | RTN4IP1  | -0.461811836 |
| NRBF2    | 0.609537116 | DPYSL2   | -0.461452735 |
| SERPINB5 | 0.6095348   | SLC37A4  | -0.461268962 |
| GALNS    | 0.609448617 | INO80B   | -0.460611514 |
| B3GAT3   | 0.609026254 | TRAPPC2L | -0.460554756 |
| NAT2     | 0.608452587 | NOTCH3   | -0.460181553 |
| HES4     | 0.608320551 | MCFD2    | -0.460110603 |
| VPS39    | 0.60832016  | CMC4     | -0.459731072 |
| RORA     | 0.607811139 | IVD      | -0.45941068  |
| ELL      | 0.607028835 | HIST3H2A | -0.459346945 |
| PSMD3    | 0.606892503 | SAAL1    | -0.459241372 |
| NOVA2    | 0.606889249 | FAM129A  | -0.458988318 |
| NNAT     | 0.606522619 | CLEC2B   | -0.458814353 |
| TMEM102  | 0.606276592 | FASTKD3  | -0.458547798 |
| DOCK8    | 0.606208281 | GTF3C6   | -0.458513165 |
| DAP      | 0.605864459 | SNRNP27  | -0.45835743  |
| CSPG5    | 0.605831218 | HNF4G    | -0.458246447 |

|           |             |              |              |
|-----------|-------------|--------------|--------------|
| LIMA1     | 0.605588347 | GALK2        | -0.457884666 |
| MPDZ      | 0.605571687 | RPL13        | -0.456860849 |
| LPIN3     | 0.605418037 | FANK1        | -0.456769193 |
| MYL7      | 0.605232947 | ATP6V0A4     | -0.456464231 |
| SVIL      | 0.605198253 | CHURC1       | -0.456174249 |
| ZNF274    | 0.604550642 | LOC100288568 | -0.456139846 |
| ZNF490    | 0.604124902 | ECH1         | -0.455680769 |
| KANSL1    | 0.603936777 | POLE         | -0.455673739 |
| IFNAR1    | 0.603725407 | OGG1         | -0.455647796 |
| WDR82     | 0.603345879 | NUDT14       | -0.455339566 |
| MAPKAPK2  | 0.603232145 | RPL12        | -0.45525781  |
| GPR39     | 0.60289994  | FH           | -0.455218206 |
| MAP3K8    | 0.602691906 | BTBD18       | -0.455064397 |
| TRIM31    | 0.602623757 | AP1M2        | -0.455000518 |
| PARP6     | 0.602179615 | FOXO1        | -0.454678922 |
| UBE2E2    | 0.601891053 | ANLN         | -0.454650356 |
| CLIP3     | 0.601888513 | TGS1         | -0.454349227 |
| DNAJC16   | 0.600370286 | CCDC23       | -0.454137433 |
| KLF16     | 0.600323946 | NDUFS3       | -0.45336924  |
| LMAN2L    | 0.600276252 | LCP1         | -0.453069351 |
| GOLGB1    | 0.600002387 | PADI3        | -0.452903128 |
| IP6K1     | 0.599683587 | TMEM9        | -0.452657025 |
| PSMB10    | 0.599458819 | NOL11        | -0.452622007 |
| HIST2H2BE | 0.599420706 | MTERFD2      | -0.452596041 |
| GLYATL3   | 0.599273912 | PPIL4        | -0.452556006 |
| DNAJB12   | 0.598781792 | VWA9         | -0.452352175 |
| RIOK3     | 0.598761894 | SPDYC        | -0.452245903 |
| SON       | 0.598747352 | NXT2         | -0.452178829 |
| SHC2      | 0.598626125 | C2orf82      | -0.452115442 |
| HTT       | 0.598541017 | RPP25L       | -0.451994076 |

|          |             |              |              |
|----------|-------------|--------------|--------------|
| GRN      | 0.598519009 | PDHX         | -0.451919025 |
| NDRG3    | 0.598461051 | MAGEB2       | -0.451143044 |
| PTPRS    | 0.598410716 | FEN1         | -0.450615279 |
| SLC25A13 | 0.598122569 | NUCKS1       | -0.450542743 |
| SLC16A6  | 0.598109425 | LOC100507670 | -0.449575875 |
| SCAMP2   | 0.598087177 | PAM16        | -0.449472837 |
| PSMD2    | 0.597757556 | GNB1         | -0.449305522 |
| EPHB4    | 0.597726588 | RALB         | -0.449291513 |
| DOCK3    | 0.597479535 | TMEM154      | -0.448311307 |
| MOV10    | 0.597446279 | KLHDC4       | -0.44822898  |
| CLASP1   | 0.597190053 | MPST         | -0.448212287 |
| WASL     | 0.597180276 | TOMM6        | -0.448072497 |
| FKBP9    | 0.596701434 | KLHDC9       | -0.447776543 |
| TBCC     | 0.596689892 | SERPINB6     | -0.447596933 |
| JOSD1    | 0.59668982  | SRSF11       | -0.446977381 |
| RGS20    | 0.59668071  | TMEM170A     | -0.446786212 |
| MICAL3   | 0.596508524 | ZDHHC6       | -0.446542103 |
| SKIV2L   | 0.596356641 | ARHGDIB      | -0.446479203 |
| SH3GL1   | 0.596096003 | PPA1         | -0.446382863 |
| MYCBP2   | 0.596031604 | DEK          | -0.446312363 |
| ZDHHC9   | 0.595854517 | ERBB4        | -0.445917012 |
| ZNF791   | 0.595688691 | PCDH7        | -0.445571825 |
| STK35    | 0.595240285 | TTC5         | -0.445483022 |
| RNF103   | 0.595104295 | OR10G2       | -0.445453609 |
| SLFN11   | 0.594631608 | LINC00493    | -0.445449588 |
| USP2     | 0.59459053  | AKR7A2       | -0.445343019 |
| PCDH9    | 0.594191907 | RPS6KB1      | -0.445316598 |
| DHX58    | 0.593863719 | KRTAP19-6    | -0.445219957 |
| CCDC71L  | 0.593602707 | PRICKLE4     | -0.445165258 |
| UAP1     | 0.593417534 | TSR3         | -0.445136391 |

|          |             |              |              |
|----------|-------------|--------------|--------------|
| MAP3K11  | 0.593367074 | SLCO1B3      | -0.444791058 |
| POLR1A   | 0.593365798 | PUS7         | -0.444623113 |
| POFUT2   | 0.593340581 | NUBP2        | -0.444563606 |
| APPBP2   | 0.593338928 | VPS26B       | -0.444071032 |
| CDK5R1   | 0.593271043 | EDA          | -0.443867094 |
| DDAH2    | 0.593139456 | KIF24        | -0.443694865 |
| ADPRHL2  | 0.592755198 | CLTCL1       | -0.443580746 |
| CLIP4    | 0.592504606 | NANOS1       | -0.443159869 |
| FBXO18   | 0.592083566 | ANXA9        | -0.443013373 |
| USP42    | 0.591959346 | PTRHD1       | -0.442604766 |
| SIKE1    | 0.591767365 | PHF5A        | -0.442512325 |
| NLGN3    | 0.591757829 | H2AFX        | -0.442304585 |
| KIAA0895 | 0.591337667 | NUP107       | -0.44199547  |
| USP20    | 0.590891273 | EIF3I        | -0.44187903  |
| RARRES3  | 0.590737693 | TMEM251      | -0.44173747  |
| DYNC1I2  | 0.590663543 | HSD17B6      | -0.441682822 |
| LRRC8A   | 0.590650343 | IKBKAP       | -0.441588831 |
| KIAA1161 | 0.590375692 | ERI2         | -0.440619974 |
| HADHB    | 0.590099908 | CLPX         | -0.440430675 |
| BDP1     | 0.590026698 | TRUB2        | -0.440089901 |
| HMGN3    | 0.589537495 | C8orf31      | -0.43993507  |
| TMEM86A  | 0.589382258 | CRLF1        | -0.438998272 |
| GPR37L1  | 0.589382258 | TYSND1       | -0.438895782 |
| PLCD1    | 0.589144513 | HACL1        | -0.438064154 |
| ZNF84    | 0.589001662 | LOC100128276 | -0.437996092 |
| ZNF8     | 0.588923566 | RPS19BP1     | -0.437898397 |
| PTP4A1   | 0.588700351 | PXMP4        | -0.437330024 |
| RWDD2A   | 0.588583686 | HNRPDL       | -0.436947805 |
| ZFYVE26  | 0.588460172 | SNRPD2       | -0.436882492 |
| CC2D1B   | 0.588153654 | CUL4B        | -0.436864296 |

|              |             |           |              |
|--------------|-------------|-----------|--------------|
| ARHGEF3      | 0.588077166 | HOXB6     | -0.436847486 |
| BCAM         | 0.587682151 | VIPR1     | -0.436551754 |
| ARHGAP21     | 0.587515943 | LPCAT2    | -0.436320998 |
| FNDC3B       | 0.587494744 | SKA2      | -0.435721128 |
| ETNK2        | 0.587137628 | APEX1     | -0.435662038 |
| RBM5         | 0.586745745 | FLJ30375  | -0.435258801 |
| GLRX2        | 0.586248321 | POLD1     | -0.434973597 |
| STK11IP      | 0.585986531 | PPIL1     | -0.434245019 |
| LOC100507507 | 0.585846874 | FGF11     | -0.434217999 |
| RNF8         | 0.585463741 | NAA50     | -0.433865536 |
| TRIM37       | 0.585431756 | COA5      | -0.433677259 |
| EMC10        | 0.58508692  | ATP5O     | -0.433562017 |
| TP53RK       | 0.585083134 | SLC25A6   | -0.43347846  |
| ISCU         | 0.584580987 | PAG1      | -0.433033763 |
| ZMIZ1        | 0.584268279 | PHLPP1    | -0.432918798 |
| TARDBP       | 0.583998456 | COA3      | -0.432880951 |
| ST14         | 0.583971879 | GTF2H3    | -0.432172627 |
| TRMT61A      | 0.583866551 | HAT1      | -0.431525306 |
| BRAT1        | 0.583577679 | DNAJC8    | -0.431434806 |
| C3orf62      | 0.583138141 | QTRT1     | -0.431302928 |
| RAET1L       | 0.582521078 | RAB11FIP2 | -0.4310993   |
| ZNF783       | 0.58203891  | PPWD1     | -0.43100985  |
| TBC1D13      | 0.581961036 | KIAA1324L | -0.430602072 |
| MUC4         | 0.581273758 | CMIP      | -0.430545852 |
| MEX3C        | 0.580788522 | CA12      | -0.430505636 |
| PUM1         | 0.580632333 | TMEM126A  | -0.430439379 |
| CTPS1        | 0.580360975 | ADCK2     | -0.430363563 |
| ZG16B        | 0.580281601 | WDR54     | -0.430250631 |
| SELT         | 0.580191718 | FAM161A   | -0.429903572 |
| ALS2         | 0.580000838 | HSD17B11  | -0.429709557 |



|          |             |              |              |
|----------|-------------|--------------|--------------|
| PTCD1    | 0.579934191 | LAMTOR5      | -0.429607686 |
| RPN1     | 0.579770945 | LOC100130502 | -0.429014204 |
| TMEM2    | 0.579745443 | LRRC27       | -0.428841824 |
| HTRA1    | 0.57973038  | DSCR3        | -0.428750933 |
| MBD1     | 0.579217542 | CLIC6        | -0.428320521 |
| ZNF488   | 0.579151898 | CASP4        | -0.42800377  |
| PDLIM2   | 0.577703906 | COL9A3       | -0.427956457 |
| EMP3     | 0.577450659 | MTHFD2L      | -0.42791572  |
| TRIM39   | 0.577135275 | OPTC         | -0.427880477 |
| PADI2    | 0.576134742 | NDRG2        | -0.427632969 |
| MADD     | 0.576058259 | PEX10        | -0.427253522 |
| CRTC2    | 0.576018244 | SNRPB        | -0.427115941 |
| RPS6KA4  | 0.575993722 | DHRS3        | -0.427093077 |
| ATP7B    | 0.575221593 | TRMT13       | -0.425833273 |
| F8A1     | 0.575192305 | ZCRB1        | -0.425787807 |
| HERC2    | 0.574754522 | DCXR         | -0.425559285 |
| SPG11    | 0.574228508 | NT5DC1       | -0.425332454 |
| TMEM114  | 0.574116546 | MTA3         | -0.425000537 |
| PIWIL4   | 0.573643339 | C14orf2      | -0.424846174 |
| PLXNA2   | 0.573437204 | B3GNT2       | -0.424642357 |
| SRD5A3   | 0.573322327 | SNRPD3       | -0.424396465 |
| C1orf233 | 0.573175717 | EBAG9        | -0.424129155 |
| AGRN     | 0.572828896 | CAPN2        | -0.423979593 |
| TNXB     | 0.57234105  | CARS2        | -0.423155268 |
| NUMB     | 0.572302763 | UBE2N        | -0.423087406 |
| ACO2     | 0.572045789 | PRKAG1       | -0.423060672 |
| E2F3     | 0.571973745 | XPOT         | -0.422964906 |
| OGDH     | 0.571562139 | LNX1         | -0.422631501 |
| ZNF592   | 0.571241785 | IARS         | -0.422621785 |
| SF3A1    | 0.570828333 | TEX9         | -0.422351448 |

|           |             |          |              |
|-----------|-------------|----------|--------------|
| AMDHD2    | 0.570061789 | CPOX     | -0.422233904 |
| ABHD4     | 0.570061296 | TMEM231  | -0.422148568 |
| GJD3      | 0.570028363 | STMN2    | -0.422059211 |
| VCP       | 0.569930206 | CDK5RAP2 | -0.421974886 |
| MYO9B     | 0.569616262 | SEMA4F   | -0.421900508 |
| TEX2      | 0.56842094  | CRIP1    | -0.421843205 |
| SMARCA5   | 0.568204878 | OR1L1    | -0.421824741 |
| PTTG1IP   | 0.568103748 | CCDC59   | -0.421436533 |
| KCTD21    | 0.568042672 | SRSF9    | -0.420556697 |
| SYNGAP1   | 0.567975518 | NDUFAB1  | -0.420459002 |
| PPP2CB    | 0.567709045 | TLX1NB   | -0.419960951 |
| CTSZ      | 0.567594225 | ATP6V0C  | -0.419773683 |
| NACC2     | 0.567576155 | GALNTL6  | -0.419580712 |
| PLXND1    | 0.567562233 | IFRD2    | -0.419444518 |
| ASB16-AS1 | 0.567226631 | CSE1L    | -0.419432455 |
| SLC38A9   | 0.56696516  | ARMC1    | -0.419153301 |
| GADD45B   | 0.566903986 | PART1    | -0.418956608 |
| BMP2K     | 0.566520161 | DLGAP1   | -0.418954048 |
| PLEKHO1   | 0.565984852 | MDH1     | -0.418907989 |
| SIAE      | 0.565856111 | VPS13A   | -0.418760435 |
| RAB43     | 0.565687472 | ABCF2    | -0.418620289 |
| MIDN      | 0.565352618 | TMEM120A | -0.418306878 |
| BRMS1L    | 0.565103863 | WTH3DI   | -0.418096182 |
| FRMD5     | 0.564834921 | TRMT2B   | -0.417995499 |
| ZNF263    | 0.564636234 | HEBP2    | -0.417359428 |
| PLD1      | 0.56457615  | HSBP1    | -0.417015689 |
| LMAN1     | 0.564353503 | L2HGDH   | -0.416032121 |
| JPH3      | 0.563858424 | ETV6     | -0.415465954 |
| SPIRE1    | 0.563705005 | F13A1    | -0.415315882 |
| RFX5      | 0.563487849 | RCAN3    | -0.415310411 |

|              |             |          |              |
|--------------|-------------|----------|--------------|
| RREB1        | 0.562959136 | PRKY     | -0.415127318 |
| PGBD2        | 0.562851521 | FBXO22   | -0.415011692 |
| SMAD4        | 0.562753963 | NUDT8    | -0.414781029 |
| LOC101060551 | 0.562446479 | CHCHD5   | -0.414666223 |
| C17orf85     | 0.562419928 | PTPN3    | -0.414633767 |
| HECA         | 0.562086043 | MAGOHB   | -0.414533409 |
| ADAM28       | 0.561954963 | BAG2     | -0.414158441 |
| ITGB1        | 0.561583564 | CYB5A    | -0.414103915 |
| PLEC         | 0.56108476  | C17orf72 | -0.413953155 |
| NR3C1        | 0.561005286 | ADPRHL1  | -0.413943419 |
| NCOA1        | 0.560658717 | CUEDC2   | -0.413649964 |
| CEACAM19     | 0.56062481  | BROX     | -0.413412534 |
| TPT1-AS1     | 0.560488493 | C1orf123 | -0.412640015 |
| RNH1         | 0.560445496 | CXXC4    | -0.412458678 |
| FXR2         | 0.560253281 | BBS2     | -0.412260534 |
| PKP3         | 0.560043161 | PEX7     | -0.412141616 |
| ARL1         | 0.55999179  | KISS1    | -0.411890823 |
| SLC41A2      | 0.559789423 | PPID     | -0.411646302 |
| BAG6         | 0.559629674 | GINS1    | -0.411618556 |
| ARNTL2       | 0.559407574 | CCNG2    | -0.411411261 |
| PLA2G15      | 0.559132159 | MUT      | -0.411402981 |
| PARVA        | 0.558771279 | MMP7     | -0.411326599 |
| CHSY1        | 0.55828904  | CSHL1    | -0.411054849 |
| FNDC3A       | 0.558123847 | PCYT2    | -0.41075913  |
| TPM3         | 0.558021489 | ELK4     | -0.410703234 |
| PLSCR1       | 0.557988887 | SOWAHD   | -0.410632294 |
| MFSD1        | 0.556593913 | TRMT61B  | -0.410480256 |
| PCMTD1       | 0.556570468 | NMB      | -0.410402943 |
| SLC43A3      | 0.55595977  | IER5L    | -0.409625081 |
| NHLRC1       | 0.555814055 | PFKFB4   | -0.408867125 |

|          |             |           |              |
|----------|-------------|-----------|--------------|
| JAK3     | 0.555710584 | CHCHD1    | -0.408326054 |
| CAP2     | 0.555668188 | PET117    | -0.408228654 |
| ZC3H11A  | 0.555613751 | ALKBH7    | -0.4074786   |
| RABAC1   | 0.555302049 | HIBADH    | -0.407249615 |
| SPPL2A   | 0.555175291 | STK17B    | -0.407199856 |
| SDC1     | 0.555112752 | LOC390956 | -0.407045737 |
| KCTD2    | 0.554734412 | PTCD3     | -0.406810385 |
| CCNL2    | 0.554653674 | PARVB     | -0.406460418 |
| RBM42    | 0.554585924 | PET112    | -0.406378799 |
| ZNF480   | 0.554482376 | TMEM53    | -0.406237215 |
| SLC35A2  | 0.554092227 | TMEM14B   | -0.406198596 |
| TCEAL8   | 0.553910532 | MRGBP     | -0.406155172 |
| ATXN1    | 0.553667144 | CNKS2     | -0.40589491  |
| DNAJC11  | 0.553424069 | TMEM171   | -0.405704463 |
| TEAD2    | 0.552994317 | SRP14     | -0.405585295 |
| ANKRD22  | 0.552743938 | PSMB8     | -0.405297505 |
| TMEM104  | 0.5526252   | TAB2      | -0.405183594 |
| MMP15    | 0.552472179 | NAA10     | -0.404312055 |
| SCAMP5   | 0.552400701 | VRK3      | -0.404263656 |
| NAT1     | 0.552063075 | AKR1C3    | -0.403985872 |
| TSNAXIP1 | 0.552033784 | NHP2L1    | -0.403970827 |
| TXNDC15  | 0.55180916  | THOC6     | -0.403866112 |
| ZNF10    | 0.551358472 | RHOT1     | -0.403827616 |
| KIAA1551 | 0.551195111 | RPL13A    | -0.403630836 |
| WDR45    | 0.551154446 | MICB      | -0.403624863 |
| BAZ1A    | 0.550870953 | CTSL1     | -0.403245978 |
| IFFO2    | 0.550463634 | NDUFA7    | -0.403114812 |
| AKAP9    | 0.550289195 | TAZ       | -0.402766279 |
| SERINC3  | 0.550151878 | HOXB7     | -0.402758073 |
| WDR55    | 0.549716889 | LY6E      | -0.40274637  |

|              |             |          |              |
|--------------|-------------|----------|--------------|
| RAD54L2      | 0.549122839 | NUDT16   | -0.402393114 |
| KIF1A        | 0.549006951 | PPP2R4   | -0.402267297 |
| ZNF529       | 0.548809925 | C4orf33  | -0.402152376 |
| ATP6AP2      | 0.548679646 | RPS18    | -0.402137478 |
| ZNF189       | 0.548612946 | C8orf42  | -0.401961529 |
| ZNF416       | 0.548488492 | UCHL5    | -0.401778032 |
| ANO7         | 0.548031448 | CDK17    | -0.401710401 |
| LPAR2        | 0.547473645 | SMC2     | -0.401624733 |
| STRADA       | 0.547302597 | C8orf44  | -0.401219272 |
| ANKFY1       | 0.547242974 | MRPL36   | -0.400863889 |
| SBNO2        | 0.546906951 | GPR22    | -0.400657996 |
| NLGN2        | 0.546587821 | SIRPD    | -0.400599308 |
| MAN1B1       | 0.546549466 | BTBD2    | -0.400452218 |
| PTPRU        | 0.546506575 | FIG4     | -0.400121437 |
| ADPGK        | 0.546428498 | MRPL14   | -0.400031389 |
| UBE2Q1       | 0.546208883 | AKR1E2   | -0.399926367 |
| FTSJD2       | 0.545869151 | MTFR1    | -0.399738953 |
| ZNF812       | 0.545794913 | RPL21    | -0.399473901 |
| FAM167B      | 0.545774862 | ATP6V0E1 | -0.399343278 |
| CHD8         | 0.545539274 | HDAC8    | -0.39907385  |
| LOC100131174 | 0.545329772 | CCDC71   | -0.398428348 |
| ZNF823       | 0.545108585 | CPSF3    | -0.398419758 |
| PYGB         | 0.544795744 | RRP7A    | -0.398157429 |
| CAMK2N1      | 0.54462113  | ZRANB2   | -0.397829591 |
| EFCAB14      | 0.544407826 | RABL5    | -0.397793421 |
| LARP4B       | 0.543895902 | CUL1     | -0.397628239 |
| FAM46B       | 0.543882132 | COIL     | -0.397182556 |
| ANO9         | 0.543823974 | FAM45A   | -0.396999106 |
| GLB1         | 0.543548722 | ING2     | -0.396920782 |
| MINPP1       | 0.543426795 | NIPA1    | -0.396818741 |

|          |             |           |              |
|----------|-------------|-----------|--------------|
| TMEM59   | 0.543178398 | TMEM5     | -0.396554969 |
| WWC3     | 0.543005031 | PSMF1     | -0.3963779   |
| CAB39L   | 0.54293562  | IRS1      | -0.396039641 |
| GNS      | 0.542890986 | ACPP      | -0.395822337 |
| ARCN1    | 0.542624321 | ENSA      | -0.395775943 |
| PHYHD1   | 0.542522746 | NIPSNAP3A | -0.395628525 |
| NR1H2    | 0.542399633 | POLE3     | -0.395505811 |
| DERL1    | 0.541916756 | VAMP3     | -0.3954833   |
| CORO1C   | 0.541824667 | CERS4     | -0.395478753 |
| FAM65B   | 0.540766108 | TEAD4     | -0.394964535 |
| FAM109B  | 0.540438009 | FAM83A    | -0.39436536  |
| TSNAX    | 0.540377502 | PTCD2     | -0.394328045 |
| NLRP2    | 0.540361013 | ZNF32     | -0.394145049 |
| ADAMTSL4 | 0.54025279  | PLA2G12A  | -0.394137183 |
| SH3D19   | 0.539711452 | SLC25A19  | -0.39403493  |
| PDCD1    | 0.539555072 | GRAMD1C   | -0.393947155 |
| TLR6     | 0.539513774 | CALN1     | -0.393695974 |
| LSM1     | 0.53858367  | MCTS1     | -0.393604214 |
| GATAD2A  | 0.538158416 | TWF2      | -0.393554894 |
| DCUN1D3  | 0.538113578 | BOD1      | -0.393216384 |
| C17orf59 | 0.537314306 | TMEM52    | -0.392389411 |
| TBK1     | 0.537252922 | HPN       | -0.391843143 |
| TRADD    | 0.536857287 | HNRNPH3   | -0.391794515 |
| CC2D1A   | 0.53678675  | NRXN2     | -0.391679569 |
| CNST     | 0.53670997  | TSSC1     | -0.391550301 |
| HEXIM1   | 0.536469252 | NAA20     | -0.391526832 |
| IMPAD1   | 0.536251218 | TIMM17B   | -0.391525277 |
| LAMP1    | 0.536222149 | ACO1      | -0.391470335 |
| BRPF3    | 0.536065946 | PSMD13    | -0.391465413 |
| CXXC1    | 0.536002191 | VDAC3     | -0.391096492 |

|           |             |                |              |
|-----------|-------------|----------------|--------------|
| C14orf28  | 0.535963449 | IP6K2          | -0.390872283 |
| HELZ      | 0.53593261  | IL10RB         | -0.390854462 |
| IGSF3     | 0.535665259 | CNTRL          | -0.390771018 |
| AP3S1     | 0.535503601 | CORO2A         | -0.390730818 |
| RUNX1     | 0.535472839 | C9orf85        | -0.390471882 |
| USP22     | 0.53511854  | TRMT112        | -0.389923038 |
| C20orf111 | 0.534975346 | TNFRSF18       | -0.389847574 |
| NR3C2     | 0.534821428 | TMEM99         | -0.389834404 |
| PPOX      | 0.53445941  | CBX5           | -0.38979582  |
| THAP5     | 0.534232105 | DIMT1          | -0.389771215 |
| CERS5     | 0.53373324  | ST3GAL5        | -0.389673017 |
| AHNAK     | 0.533405951 | UBR7           | -0.389613858 |
| MTMR4     | 0.53299578  | FNDC5          | -0.38955472  |
| GPAT2     | 0.532828458 | GSTCD          | -0.389545165 |
| R3HDM2    | 0.532700484 | FRMD3          | -0.389305351 |
| DDR2      | 0.532533817 | THOC1          | -0.389175429 |
| USP15     | 0.532258488 | NDUFB8         | -0.388994922 |
| CAD       | 0.531795347 | EIF1B          | -0.388963409 |
| PRR14     | 0.531736743 | HPCAL1         | -0.388769316 |
| KRT34     | 0.531555106 | CPD            | -0.388453579 |
| MED26     | 0.531541005 | PTGES3L-AARSD1 | -0.388269285 |
| ELMSAN1   | 0.531070307 | RBFA           | -0.387991073 |
| ZMYM2     | 0.531006858 | LSM7           | -0.387645685 |
| SEC24C    | 0.530808755 | DNAJA2         | -0.387603787 |
| CHST12    | 0.530476511 | PLS1           | -0.387515214 |
| PIGO      | 0.530243863 | YAP1           | -0.387492643 |
| ZNF304    | 0.530011234 | SNX7           | -0.386894732 |
| WDR7      | 0.529958001 | VSX1           | -0.385777423 |
| GALNT1    | 0.529922923 | POLQ           | -0.385601095 |
| PILRB     | 0.529875285 | COMMD3         | -0.385443077 |

|           |             |         |              |
|-----------|-------------|---------|--------------|
| SURF4     | 0.529532051 | CLASRP  | -0.385090456 |
| C7orf10   | 0.529254868 | ARRDC3  | -0.384386574 |
| PCNT      | 0.529243853 | STUB1   | -0.384185506 |
| FKBP3     | 0.528920554 | PPIF    | -0.38417128  |
| VPS11     | 0.52887915  | NDUFA12 | -0.383101844 |
| VPS28     | 0.52882659  | FECH    | -0.382922535 |
| ARHGEF10L | 0.528817933 | WDR18   | -0.382745537 |
| TSPYL5    | 0.528553183 | C5orf44 | -0.382699061 |
| CCDC47    | 0.528297462 | SH3YL1  | -0.382640668 |
| DFNA5     | 0.528059172 | OTUD6A  | -0.382562787 |
| TYK2      | 0.527956472 | PACSIN3 | -0.382515791 |
| ISG20L2   | 0.527673632 | PPP4C   | -0.382511372 |
| MGAT4B    | 0.527572082 | PRPSAP2 | -0.382479164 |
| PJA2      | 0.52750258  | NR2C1   | -0.382309723 |
| SMURF1    | 0.527202385 | PARL    | -0.382139894 |
| RASL10A   | 0.527053896 | OBSCN   | -0.381906977 |
| INPP5B    | 0.526850232 | BFSP1   | -0.381788347 |
| KDM4B     | 0.526829191 | PDHA1   | -0.381706052 |
| SP110     | 0.526714576 | PPP1R7  | -0.381504834 |
| MAVS      | 0.526624502 | EIF4G2  | -0.3811432   |
| SLC35A5   | 0.526533402 | RDH10   | -0.380999396 |
| ZNF266    | 0.526528581 | EFNB1   | -0.380933315 |
| DBNL      | 0.526403549 | POU3F1  | -0.380803334 |
| TTC7A     | 0.526258535 | TAF8    | -0.380786153 |
| UPRT      | 0.526208146 | WRAP73  | -0.380744946 |
| FUT2      | 0.526151489 | LGALS7B | -0.380564715 |
| BIRC2     | 0.526073051 | EIF3J   | -0.380555282 |
| TBC1D23   | 0.525584857 | MAN1A2  | -0.380294915 |
| REEP5     | 0.525314236 | TRMT1L  | -0.380247708 |
| DIO2      | 0.525222339 | UGT2B28 | -0.379977866 |



|           |             |          |              |
|-----------|-------------|----------|--------------|
| RNF39     | 0.52508734  | ACTL10   | -0.379851789 |
| DCP2      | 0.525013644 | PLCG2    | -0.379701817 |
| MAP1LC3B2 | 0.524680097 | SLC45A4  | -0.37966663  |
| DIAPH2    | 0.524372923 | PRDX5    | -0.379598347 |
| EFCAB4A   | 0.524288025 | C9orf142 | -0.379325258 |
| TMF1      | 0.523817486 | UROD     | -0.379010129 |
| LETM1     | 0.522538593 | SHFM1    | -0.379002714 |
| SF3B4     | 0.522464134 | HRAS     | -0.378994952 |
| UTP3      | 0.522291253 | PIGB     | -0.378825785 |
| CSRP2BP   | 0.522285259 | PGP      | -0.378717996 |
| RNF25     | 0.522215827 | RCOR2    | -0.378616439 |
| CBX2      | 0.522189926 | RPL10A   | -0.37860367  |
| NPIPL3    | 0.521962004 | AKD1     | -0.378514331 |
| LENEP     | 0.521839669 | MESP2    | -0.378424593 |
| HSPA1A    | 0.521337471 | H2AFY    | -0.377935794 |
| BAHD1     | 0.521274102 | ING5     | -0.377566826 |
| MNT       | 0.521269747 | PAK1     | -0.377481638 |
| KIAA0355  | 0.520919001 | HCFC1R1  | -0.377227052 |
| LRP12     | 0.520832906 | FAF1     | -0.377204177 |
| TAF7      | 0.520761471 | MIF4GD   | -0.376272561 |
| ZNF444    | 0.520034636 | SMAD1    | -0.376178157 |
| TAF7L     | 0.519536783 | RPL37    | -0.375770499 |
| DENND4B   | 0.519411183 | DKC1     | -0.375735979 |
| RALGAPB   | 0.519386153 | MRPS16   | -0.375589569 |
| FRYL      | 0.519316549 | TMEM155  | -0.375518326 |
| VPS8      | 0.518981535 | PGRMC1   | -0.375375902 |
| TEX22     | 0.51886523  | MRPL38   | -0.375347743 |
| ABCG4     | 0.518419049 | CAPNS1   | -0.375287648 |
| FAM63B    | 0.518374916 | CCNF     | -0.375258202 |
| MRGPRF    | 0.517930898 | IRF4     | -0.375170677 |

|          |             |           |              |
|----------|-------------|-----------|--------------|
| C2orf54  | 0.517890436 | MRPL50    | -0.375023526 |
| TMOD3    | 0.517654301 | PALMD     | -0.374993079 |
| IL15     | 0.517593444 | MAPKAPK5  | -0.374134695 |
| GORASP2  | 0.517587489 | SFXN1     | -0.374117606 |
| NPW      | 0.517487942 | SMIM7     | -0.3738901   |
| ATG9B    | 0.517487712 | AASDHPPT  | -0.373831089 |
| C6orf132 | 0.517341293 | MRPS30    | -0.373568707 |
| MPPE1    | 0.517086258 | C5        | -0.373516832 |
| NFX1     | 0.516884465 | CA2       | -0.373391333 |
| NISCH    | 0.516693344 | TADA3     | -0.373371139 |
| ATF7IP   | 0.516333071 | RPS6KA2   | -0.373280193 |
| LRRC32   | 0.516155202 | CWC15     | -0.373137278 |
| CLC      | 0.516090324 | TATDN1    | -0.373126843 |
| SLC25A30 | 0.516060203 | KARS      | -0.372783054 |
| ELK1     | 0.515910343 | C11orf57  | -0.372704116 |
| BDKRB1   | 0.515835702 | C7orf50   | -0.372691412 |
| TIGD7    | 0.515614189 | CPT1A     | -0.372392442 |
| NSUN4    | 0.515429899 | LDHB      | -0.372368843 |
| TYMP     | 0.514878926 | SIX1      | -0.372302448 |
| SEC24A   | 0.514741344 | RPL36AL   | -0.372286489 |
| ISPD     | 0.514673135 | MTX2      | -0.372267524 |
| APLP2    | 0.514566296 | METTL2B   | -0.372014472 |
| NUP98    | 0.514493956 | E2F1      | -0.371729503 |
| FBRS     | 0.514387927 | PWP1      | -0.371387799 |
| TUBB2B   | 0.514171061 | TMEM161B  | -0.370915249 |
| SOX9     | 0.514101454 | OR3A2     | -0.370765465 |
| EDA2R    | 0.51357757  | ZNF445    | -0.370759873 |
| ARHGEF7  | 0.513440245 | MAF1      | -0.370751882 |
| EZR      | 0.513281832 | ZADH2     | -0.370657163 |
| ACOX1    | 0.513243441 | C14orf142 | -0.37016729  |

|           |             |           |              |
|-----------|-------------|-----------|--------------|
| SERPIN8   | 0.51290093  | ASIC3     | -0.370107653 |
| PLOD1     | 0.512521226 | IQSEC2    | -0.370003499 |
| KIAA1522  | 0.512518805 | ACSS3     | -0.369851435 |
| KIAA0319L | 0.512063819 | LINC00667 | -0.36940557  |
| VWA1      | 0.511979837 | MTIF3     | -0.369162876 |
| JMY       | 0.511912531 | MOCS2     | -0.369016227 |
| REPS1     | 0.511457733 | ABCA1     | -0.368810581 |
| FADS3     | 0.511397411 | FAM127A   | -0.368731621 |
| GLIPR1    | 0.511150589 | SLK       | -0.368600281 |
| SUN2      | 0.510783813 | LOC339666 | -0.368550371 |
| SLC2A10   | 0.510780572 | METTL5    | -0.368088689 |
| HNRNPH2   | 0.5102715   | C19orf53  | -0.367925998 |
| GOLGA3    | 0.510078195 | DLG3      | -0.367815263 |
| CRYBB3    | 0.509970419 | FAM172BP  | -0.367642701 |
| ABCB6     | 0.509933738 | NPC2      | -0.36744576  |
| CHD3      | 0.509895278 | SFT2D1    | -0.367315823 |
| ADAMTS16  | 0.509894216 | RPL23A    | -0.367047925 |
| PCNXL2    | 0.509829681 | CEBPB     | -0.3669731   |
| SLC39A1   | 0.509637992 | PPP3CB    | -0.366792241 |
| BTBD10    | 0.50943064  | IRAK1     | -0.36625861  |
| TSPAN13   | 0.509030931 | KLF3      | -0.366088745 |
| CTNBL1    | 0.508563327 | LEO1      | -0.36596109  |
| SOX12     | 0.508397557 | VPS13D    | -0.365756864 |
| VASP      | 0.508334017 | NDUFAF4   | -0.365583798 |
| CYB5B     | 0.508047413 | HAUS4     | -0.365389214 |
| PLEKHG2   | 0.508000667 | GMPR2     | -0.365386449 |
| RSBN1     | 0.507850959 | MRPL18    | -0.365373979 |
| RIC8A     | 0.507571608 | MKS1      | -0.365123286 |
| ZFHX3     | 0.507418548 | NSDHL     | -0.365050877 |
| SDCBP     | 0.507333506 | USP44     | -0.364636931 |

|          |             |           |              |
|----------|-------------|-----------|--------------|
| SIAH2    | 0.507046435 | ENDOG     | -0.364373407 |
| ACAD10   | 0.506866329 | CERKL     | -0.364338175 |
| TADA2B   | 0.506822755 | TTC27     | -0.364266249 |
| LRRC16A  | 0.506523589 | GABARAPL2 | -0.364171899 |
| FANCF    | 0.506074864 | ECI1      | -0.36404939  |
| SPEG     | 0.506005444 | ATP5I     | -0.363683869 |
| CCM2     | 0.505712769 | TRMT1     | -0.363355787 |
| TOR1AIP1 | 0.505135088 | LRRC45    | -0.362680937 |
| SLC10A3  | 0.504895407 | RPS11     | -0.362623319 |
| AAED1    | 0.504763107 | BAIAP2L2  | -0.361700895 |
| FAM193A  | 0.504713689 | NOP58     | -0.361632733 |
| MAN2A2   | 0.504688701 | PRR15L    | -0.361565462 |
| ECE1     | 0.504659461 | CCT6A     | -0.36149614  |
| TMEM185A | 0.504645631 | FUT9      | -0.36111513  |
| C6orf25  | 0.504548973 | PMPCB     | -0.361086763 |
| TSC2     | 0.504499865 | PEX14     | -0.361081603 |
| UVSSA    | 0.50428529  | METTL21A  | -0.360914934 |
| GALNT2   | 0.503700187 | ALDOA     | -0.360547313 |
| TMEM19   | 0.503327089 | ARHGAP35  | -0.360414693 |
| TOLLIP   | 0.503256722 | CXCR1     | -0.359321888 |
| KIN      | 0.502974901 | ATIC      | -0.358814542 |
| ELF4     | 0.502876323 | FBL       | -0.35840017  |
| VENTXP7  | 0.502836598 | PDCD2L    | -0.35810551  |
| FOS      | 0.502707969 | PHKG1     | -0.357741713 |
| PTAFR    | 0.502685192 | TCEB1     | -0.357622436 |
| TMCO4    | 0.502578898 | PFDN6     | -0.357520907 |
| CTAGE11P | 0.502578065 | SLC29A1   | -0.357105665 |
| TMEM25   | 0.502541069 | SNX14     | -0.356779679 |
| NCSTN    | 0.502502112 | RPUSD3    | -0.356423732 |
| SLC35A4  | 0.502350778 | FCHO1     | -0.356355056 |

|              |             |          |              |
|--------------|-------------|----------|--------------|
| TRAF3        | 0.502321389 | DCTPP1   | -0.356332709 |
| RASSF7       | 0.501696931 | C4orf26  | -0.356271533 |
| GPR6         | 0.500919242 | SLC2A4RG | -0.356211896 |
| TPD52        | 0.500716531 | F12      | -0.356200811 |
| ZNF587       | 0.500516172 | TP73     | -0.356176834 |
| GPR115       | 0.500411476 | AGBL2    | -0.35614638  |
| FBXO10       | 0.500282552 | KDELC1   | -0.356116128 |
| MYBBP1A      | 0.499658429 | FZD4     | -0.356005593 |
| SEPT8        | 0.499613702 | EXOC3L1  | -0.356005189 |
| GPR87        | 0.499567163 | KXD1     | -0.355646317 |
| ATP6V0D1     | 0.499520184 | DNAJC9   | -0.355531136 |
| STAT5A       | 0.499422844 | THAP3    | -0.355364539 |
| AIFM2        | 0.499207787 | SLC38A6  | -0.355254585 |
| MPHOSPH8     | 0.499110284 | DOCK9    | -0.354831354 |
| PELI1        | 0.499011127 | PIN1     | -0.354683419 |
| ASB1         | 0.498862163 | AHR      | -0.354593734 |
| OTUD3        | 0.498839495 | POLA2    | -0.354511334 |
| AFTPH        | 0.498553022 | MED4     | -0.354505502 |
| KCNQ3        | 0.498403433 | TTI1     | -0.354345465 |
| TFE3         | 0.49839706  | PTEN     | -0.354271602 |
| GPR50        | 0.498201831 | PIGH     | -0.354230485 |
| AFAP1L2      | 0.498177842 | WDR19    | -0.35420495  |
| KIF1C        | 0.498084419 | APLNR    | -0.353941333 |
| OSBPL11      | 0.497892613 | GAPDH    | -0.353334009 |
| ANO8         | 0.49737305  | APOBEC3G | -0.353254637 |
| ATMIN        | 0.497298372 | ING4     | -0.353065988 |
| ARHGEF2      | 0.497210874 | FLJ27352 | -0.35304496  |
| TGFBR1       | 0.496981758 | APOPT1   | -0.352897026 |
| IL22RA1      | 0.496827059 | NTPCR    | -0.352619833 |
| LOC100129520 | 0.49673133  | RPS21    | -0.351628956 |

|            |             |           |              |
|------------|-------------|-----------|--------------|
| MTOR       | 0.496370492 | LCE2A     | -0.351617889 |
| FAM117A    | 0.496114191 | ZNF251    | -0.351542214 |
| PITPNM3    | 0.495874371 | NOXA1     | -0.351436047 |
| PCNXL3     | 0.49574981  | ZMYND8    | -0.351245104 |
| HPS4       | 0.495704051 | HMGB3     | -0.351158243 |
| STOM       | 0.495654434 | CCDC43    | -0.351131389 |
| ZSCAN29    | 0.495592013 | TRAPPC1   | -0.350894269 |
| ADAMTS2    | 0.495483898 | ICT1      | -0.350695999 |
| CMTM3      | 0.49528988  | MBP       | -0.350637279 |
| C16orf70   | 0.495237521 | PRPF40A   | -0.350485091 |
| MAST2      | 0.494749657 | PSMA1     | -0.350462569 |
| PKP2       | 0.494605496 | RNF183    | -0.35042756  |
| PICK1      | 0.494307587 | C3orf70   | -0.350413861 |
| LRRK1      | 0.494229336 | SH3BP5    | -0.350302084 |
| ARHGEF10   | 0.494226588 | ALDH2     | -0.350235553 |
| GLG1       | 0.494165055 | IMMT      | -0.350009947 |
| SEPT4      | 0.494040857 | RDBP      | -0.349916207 |
| ST6GALNAC6 | 0.493986159 | SLC25A14  | -0.349871068 |
| TAB3       | 0.493892213 | MTCH1     | -0.349748374 |
| ZNF652     | 0.493776607 | PIGP      | -0.349558304 |
| CREM       | 0.493617667 | FLT3LG    | -0.349484797 |
| ZFR        | 0.493537582 | CIAO1     | -0.349451572 |
| KCNMB3     | 0.493242293 | LOC729678 | -0.349450546 |
| EIF5A2     | 0.493030678 | UEVLD     | -0.349442812 |
| ATP6V0A2   | 0.492942359 | RNF168    | -0.349379672 |
| ZSWIM6     | 0.492323232 | GEMIN6    | -0.348854472 |
| TMEM184A   | 0.492258801 | HNRNPC    | -0.348700313 |
| LINC00626  | 0.492222236 | IFT52     | -0.348451043 |
| BCAR3      | 0.492203969 | AHCYL1    | -0.348065401 |
| HCN2       | 0.49212683  | GPATCH4   | -0.347997431 |

|          |             |          |              |
|----------|-------------|----------|--------------|
| RAB30    | 0.491920452 | TSHZ1    | -0.347844695 |
| RAB13    | 0.491877235 | ICA1     | -0.347301603 |
| CDC42EP5 | 0.491641001 | CCRL2    | -0.34730016  |
| RNF111   | 0.491597981 | KLHL12   | -0.346919106 |
| BCL9L    | 0.491569794 | EID1     | -0.346581947 |
| ZNF3     | 0.491550031 | MRPL23   | -0.346387646 |
| PEX5L    | 0.491428329 | ELFN1    | -0.346191016 |
| VANGL1   | 0.491237024 | MSRB2    | -0.346102405 |
| C5orf28  | 0.491200328 | DDT      | -0.345968702 |
| SDPR     | 0.491008859 | DHTKD1   | -0.345002787 |
| GLT25D1  | 0.490772345 | TMEM254  | -0.34491744  |
| NFRKB    | 0.490745109 | GRPEL1   | -0.344823046 |
| SF1      | 0.490636463 | COTL1    | -0.34470834  |
| DNAJA1   | 0.490071816 | MRPL42   | -0.344446119 |
| ZNF799   | 0.4898642   | C12orf68 | -0.343914352 |
| NGFRAP1  | 0.489710395 | TUFM     | -0.343859339 |
| NECAP2   | 0.489597891 | MPP5     | -0.343833961 |
| CEPT1    | 0.489536136 | GARS     | -0.343803897 |
| OR51L1   | 0.489480016 | FAM173B  | -0.343676921 |
| RPS6KC1  | 0.489424487 | ARMCX5   | -0.343480229 |
| C6orf106 | 0.489347464 | BOLA1    | -0.342970313 |
| LDB1     | 0.489301838 | TNPO1    | -0.342937535 |
| SNHG11   | 0.489100595 | HSPA12B  | -0.342901105 |
| CABIN1   | 0.488952096 | RPL27    | -0.342856273 |
| ZMAT3    | 0.488907804 | USP1     | -0.342694154 |
| TRIO     | 0.488711751 | MITD1    | -0.342180317 |
| BCL2L13  | 0.488574642 | CBL      | -0.341870285 |
| SLC39A8  | 0.488463863 | AKNA     | -0.341795195 |
| PITPNA   | 0.487272451 | AATF     | -0.341446052 |
| SLC39A7  | 0.48723872  | MPI      | -0.341444711 |

|          |             |          |              |
|----------|-------------|----------|--------------|
| DDX23    | 0.487081044 | MRPS17   | -0.34129764  |
| RNF122   | 0.486809095 | SNRNP40  | -0.341199222 |
| CNFN     | 0.486591338 | PTPRA    | -0.340805123 |
| GAN      | 0.486338626 | RPL32    | -0.340764829 |
| SCCPDH   | 0.486299874 | ELAVL1   | -0.340240481 |
| CCDC120  | 0.486169397 | STK16    | -0.340161923 |
| AP2A2    | 0.486128543 | UQCRC1   | -0.33976202  |
| AIG1     | 0.48601646  | HYAL3    | -0.339742769 |
| IDS      | 0.485769275 | MRPS27   | -0.339736297 |
| CATSPERB | 0.4855686   | MYLIP    | -0.339521848 |
| ACTL6B   | 0.485388944 | NDUFS7   | -0.339377586 |
| GPR161   | 0.485143763 | NUPL1    | -0.339175589 |
| ABCF1    | 0.485136389 | GOLGA6L2 | -0.33900096  |
| YIPF3    | 0.484919875 | EPS8L3   | -0.33881479  |
| CCR8     | 0.484868671 | CEP72    | -0.338588321 |
| SLC38A1  | 0.484786857 | PBX2     | -0.338491232 |
| GRIA4    | 0.484264495 | SMYD3    | -0.338240268 |
| AP3D1    | 0.483913255 | CCDC14   | -0.337673529 |
| ZNF548   | 0.483873367 | NUDT5    | -0.337354876 |
| TBC1D25  | 0.48363125  | PDIK1L   | -0.33733445  |
| PACS2    | 0.48361537  | PLEKHJ1  | -0.33731321  |
| WTIP     | 0.483587662 | MTMR6    | -0.337252544 |
| WBP2     | 0.483496664 | CCNY     | -0.337152498 |
| THRAP3   | 0.483360238 | NUDT9    | -0.336839979 |
| TBC1D20  | 0.482563605 | GLT25D2  | -0.336590124 |
| VAV2     | 0.482549308 | HAO2     | -0.336208803 |
| WIP12    | 0.482353277 | TIMM10   | -0.336155518 |
| DTNA     | 0.482183386 | NDUFB7   | -0.336088322 |
| PTPRK    | 0.48207181  | TADA2A   | -0.335973493 |
| INF2     | 0.481936554 | KTN1     | -0.335850358 |



|          |             |          |              |
|----------|-------------|----------|--------------|
| SENP5    | 0.481483878 | NPM1     | -0.335774929 |
| LCN12    | 0.481270995 | SSX5     | -0.33564173  |
| ANO6     | 0.481162297 | ARG2     | -0.335316457 |
| MBNL2    | 0.481128705 | PRKAR2B  | -0.335102155 |
| ZNF451   | 0.481003082 | TANC1    | -0.33454868  |
| ZBTB49   | 0.480777576 | GULP1    | -0.334241912 |
| ENTPD4   | 0.480667436 | HNRNPL   | -0.333979753 |
| EVI5     | 0.480610179 | BRK1     | -0.333931266 |
| GLT8D1   | 0.480015995 | ERI3     | -0.333807236 |
| NKX2-5   | 0.479965681 | DBNDD2   | -0.333780405 |
| MAP1LC3B | 0.479659889 | CMTM4    | -0.333583797 |
| GCNT2    | 0.479496668 | METTL10  | -0.333518765 |
| LY75     | 0.478912076 | DZIP3    | -0.333488035 |
| SMG8     | 0.478836747 | TMEM91   | -0.333488035 |
| STXBP5L  | 0.478807278 | TRAK1    | -0.333410906 |
| MAP3K2   | 0.478765248 | DLG1-AS1 | -0.333341209 |
| MIB2     | 0.478666454 | OCIAD1   | -0.333202761 |
| SPARC    | 0.478566713 | CCT4     | -0.333089971 |
| LUC7L3   | 0.478409356 | PPAP2B   | -0.333069899 |
| ZNF701   | 0.478200402 | APOA1BP  | -0.332798008 |
| TBC1D22B | 0.477991647 | ARL2BP   | -0.33269997  |
| FOXJ2    | 0.477929491 | ANKEF1   | -0.332625066 |
| WDR48    | 0.476805601 | KLHDC3   | -0.332606719 |
| NFE2L2   | 0.476698234 | MSL1     | -0.332556321 |
| DDX3X    | 0.476435959 | SMAGP    | -0.332255497 |
| ORAI2    | 0.476253163 | AK2      | -0.332223211 |
| CAPN9    | 0.476136667 | CRMP1    | -0.332053448 |
| CASP2    | 0.476120419 | BRAF     | -0.331697704 |
| SOCS5    | 0.475983934 | SNX13    | -0.331388257 |
| SPRR1A   | 0.475847544 | SNHG3    | -0.331313028 |

|         |             |              |              |
|---------|-------------|--------------|--------------|
| IL17D   | 0.475756497 | HNRNPH1      | -0.331203897 |
| ALKBH5  | 0.475617241 | IGF2BP3      | -0.330961902 |
| SPOCK1  | 0.475609548 | TXNDC12      | -0.330854815 |
| SYS1    | 0.475381837 | TET2         | -0.330822817 |
| ASXL1   | 0.475222057 | LOC100128340 | -0.330668471 |
| ERO1L   | 0.475209483 | CSNK1E       | -0.330462297 |
| ADAM9   | 0.475130572 | GLTSCR2      | -0.330443615 |
| ACVR1   | 0.474601449 | RALY         | -0.330283443 |
| TTC14   | 0.47457147  | KIAA0753     | -0.330225772 |
| RECQL   | 0.474545268 | RBM34        | -0.330148994 |
| MAL     | 0.474523801 | RABEPK       | -0.33001908  |
| USP48   | 0.474456964 | MRTO4        | -0.329981805 |
| ZNF419  | 0.474434776 | ACSL4        | -0.329687402 |
| ZNF622  | 0.47433934  | SNAPC5       | -0.329452078 |
| DUSP14  | 0.474299688 | CRBN         | -0.329236459 |
| ZSCAN30 | 0.474280444 | MRPS6        | -0.329100822 |
| PABPC4  | 0.474109414 | ERLIN2       | -0.329036857 |
| SMPD4   | 0.474002958 | KHK          | -0.328821432 |
| HN1     | 0.47390765  | IKZF2        | -0.328677623 |
| MLLT6   | 0.473869731 |              |              |
| PQLC1   | 0.473732235 |              |              |
| CAMSAP2 | 0.473246769 |              |              |
| ARAP2   | 0.473155117 |              |              |
| CYP7B1  | 0.473021392 |              |              |
| SEC61A1 | 0.472985126 |              |              |
| MAP6D1  | 0.4729717   |              |              |
| HIF1A   | 0.472877989 |              |              |
| SPIRE2  | 0.472758699 |              |              |
| LAMP2   | 0.472427731 |              |              |
| ZMYM6   | 0.472396636 |              |              |

|           |             |  |  |
|-----------|-------------|--|--|
| C12orf5   | 0.472381886 |  |  |
| CRYBG3    | 0.472248831 |  |  |
| GSK3B     | 0.472039965 |  |  |
| MZB1      | 0.471997485 |  |  |
| CLASP2    | 0.471941158 |  |  |
| CISD1     | 0.471910859 |  |  |
| PTPRG     | 0.471830849 |  |  |
| SEL1L     | 0.471745744 |  |  |
| KIAA1671  | 0.471656953 |  |  |
| INHBB     | 0.471513869 |  |  |
| INPP5A    | 0.471452203 |  |  |
| FBXO46    | 0.471443158 |  |  |
| HARS      | 0.471411275 |  |  |
| MLL5      | 0.471357848 |  |  |
| HUWE1     | 0.471201987 |  |  |
| NMT1      | 0.470882961 |  |  |
| PHLDA3    | 0.470845699 |  |  |
| RABGGTA   | 0.47060183  |  |  |
| ATP2C1    | 0.470536336 |  |  |
| TFIP11    | 0.470341844 |  |  |
| LANCL2    | 0.470128547 |  |  |
| SLC38A3   | 0.469808703 |  |  |
| RRAGB     | 0.469360097 |  |  |
| SGPL1     | 0.469013533 |  |  |
| AOC2      | 0.468963679 |  |  |
| MAGEA10   | 0.468948721 |  |  |
| GTPBP5    | 0.46875138  |  |  |
| ANKIB1    | 0.468447245 |  |  |
| TNFRSF10B | 0.468120385 |  |  |
| AGPAT1    | 0.46811413  |  |  |

|         |             |  |  |
|---------|-------------|--|--|
| ADNP    | 0.467611309 |  |  |
| SFN     | 0.467513157 |  |  |
| FBXO28  | 0.46727356  |  |  |
| LIMK2   | 0.467213613 |  |  |
| LMO2    | 0.46719923  |  |  |
| THAP8   | 0.466529873 |  |  |
| NEXN    | 0.466489158 |  |  |
| ENTPD7  | 0.46605204  |  |  |
| TMCC3   | 0.465778736 |  |  |
| ZNF516  | 0.465343323 |  |  |
| TOR1B   | 0.465311513 |  |  |
| COQ10B  | 0.465292578 |  |  |
| METRNL  | 0.465078976 |  |  |
| TXNRD2  | 0.465054475 |  |  |
| RFX1    | 0.46488245  |  |  |
| TMEM201 | 0.464813521 |  |  |
| BBC3    | 0.464553273 |  |  |
| CDS2    | 0.464520631 |  |  |
| CWC25   | 0.464078481 |  |  |
| CCNJL   | 0.464050184 |  |  |
| SMYD2   | 0.463943799 |  |  |
| MAX     | 0.463519565 |  |  |
| MMGT1   | 0.463396609 |  |  |
| VPS18   | 0.463389409 |  |  |
| NOL9    | 0.463034189 |  |  |
| DHRX    | 0.462625125 |  |  |
| FBXL15  | 0.462518259 |  |  |
| BAK1    | 0.462466969 |  |  |
| TCP11L1 | 0.462377184 |  |  |
| IFT20   | 0.462299072 |  |  |

|          |             |  |  |
|----------|-------------|--|--|
| CD164    | 0.462285646 |  |  |
| GJB5     | 0.462153476 |  |  |
| WDR11    | 0.461890437 |  |  |
| GRIP1    | 0.461555596 |  |  |
| HMG5     | 0.461544159 |  |  |
| RHOD     | 0.461442085 |  |  |
| CST5     | 0.461353456 |  |  |
| POMGNT1  | 0.461126223 |  |  |
| ACE      | 0.461031433 |  |  |
| POLRMT   | 0.460946977 |  |  |
| TFCP2L1  | 0.460743886 |  |  |
| SLC39A11 | 0.460726433 |  |  |
| ACADV1   | 0.460421886 |  |  |
| NEU1     | 0.460082567 |  |  |
| BRF2     | 0.460078504 |  |  |
| HSFX2    | 0.459611115 |  |  |
| TRPC4AP  | 0.459255358 |  |  |
| KPNA6    | 0.459171159 |  |  |
| FAM186B  | 0.45888368  |  |  |
| CACUL1   | 0.458825528 |  |  |
| AKIRIN2  | 0.458652531 |  |  |
| CERS1    | 0.458466904 |  |  |
| TIMP3    | 0.458358248 |  |  |
| DDA1     | 0.458256958 |  |  |
| TRPM7    | 0.458230025 |  |  |
| PHF20    | 0.4579503   |  |  |

|    | Gene Set_KEGG Pathway                                   | Size | ES   | NES  | NOM $p$ -val | FDR $q$ -val |
|----|---------------------------------------------------------|------|------|------|--------------|--------------|
| 1  | KEGG_CELL_ADHESION_MOLECULES_CAMS                       | 127  | 0.64 | 1.69 | 0            | 0.025        |
| 2  | KEGG_TOLL_LIKE_RECEPTOR_SIGNALING_PATHWAY               | 96   | 0.64 | 1.63 | 0            | 0.062        |
| 3  | KEGG_CYTOKINE_CYTOKINE_RECEPTOR_INTERACTION             | 251  | 0.58 | 1.62 | 0            | 0.045        |
| 4  | KEGG_RIG_I_LIKE_RECEPTOR_SIGNALING_PATHWAY              | 65   | 0.66 | 1.62 | 0            | 0.036        |
| 5  | KEGG_LEISHMANIA_INFECTION                               | 68   | 0.66 | 1.6  | 0.001        | 0.039        |
| 6  | KEGG_VIRAL_MYOCARDITIS                                  | 63   | 0.65 | 1.57 | 0            | 0.061        |
| 7  | KEGG_PATHOGENIC_ESCHERICHIA_COLI_INFECTION              | 54   | 0.66 | 1.57 | 0.001        | 0.054        |
| 8  | KEGG_ECM_RECEPTOR_INTERACTION                           | 84   | 0.63 | 1.56 | 0.003        | 0.054        |
| 9  | KEGG_LYSOSOME                                           | 121  | 0.59 | 1.55 | 0            | 0.061        |
| 10 | KEGG_BASAL_CELL_CARCINOMA                               | 55   | 0.65 | 1.54 | 0.007        | 0.058        |
| 11 | KEGG_COMPLEMENT_AND_COAGULATION_CASCADES                | 69   | 0.62 | 1.52 | 0.003        | 0.077        |
| 12 | KEGG_MELANOGENESIS                                      | 100  | 0.59 | 1.51 | 0.004        | 0.077        |
| 13 | KEGG_AXON_GUIDANCE                                      | 128  | 0.58 | 1.51 | 0            | 0.071        |
| 14 | KEGG_GLYCOSAMINOGLYCAN_BIOSYNTHESIS_CHONDROITIN_SULFATE | 22   | 0.76 | 1.51 | 0.013        | 0.068        |
| 15 | KEGG_NOD_LIKE_RECEPTOR_SIGNALING_PATHWAY                | 62   | 0.62 | 1.49 | 0.014        | 0.082        |
| 16 | KEGG_SMALL_CELL_LUNG_CANCER                             | 84   | 0.59 | 1.48 | 0.009        | 0.086        |
| 17 | KEGG_PATHWAYS_IN_CANCER                                 | 324  | 0.52 | 1.48 | 0.001        | 0.083        |
| 18 | KEGG_TIGHT_JUNCTION                                     | 130  | 0.56 | 1.47 | 0.005        | 0.091        |
| 19 | KEGG_FOCAL_ADHESION                                     | 198  | 0.52 | 1.45 | 0.004        | 0.114        |
| 20 | KEGG_ANTIGEN_PROCESSING_AND_PRESENTATION                | 64   | 0.58 | 1.42 | 0.021        | 0.139        |
| 21 | KEGG_MAPK_SIGNALING_PATHWAY                             | 264  | 0.5  | 1.4  | 0.002        | 0.166        |
| 22 | KEGG_ADHERENS_JUNCTION                                  | 72   | 0.56 | 1.4  | 0.032        | 0.162        |
| 23 | KEGG_CYTOSOLIC_DNA_SENSING_PATHWAY                      | 49   | 0.59 | 1.38 | 0.043        | 0.191        |
| 24 | KEGG_PHOSPHATIDYLINOSITOL_SIGNALING_SYSTEM              | 75   | 0.55 | 1.37 | 0.027        | 0.196        |
| 25 | KEGG_HEDGEHOG_SIGNALING_PATHWAY                         | 55   | 0.57 | 1.37 | 0.038        | 0.194        |
| 26 | KEGG_LEUKOCYTE_TRANSENDOTHELIAL_MIGRATION               | 115  | 0.52 | 1.35 | 0.021        | 0.221        |

|    |                                                                 |     |      |      |       |       |
|----|-----------------------------------------------------------------|-----|------|------|-------|-------|
| 27 | KEGG_T_CELL_RECEPTOR_SIGNALING_PATHWAY                          | 107 | 0.52 | 1.35 | 0.021 | 0.216 |
| 28 | KEGG_B_CELL_RECEPTOR_SIGNALING_PATHWAY                          | 74  | 0.55 | 1.35 | 0.035 | 0.212 |
| 29 | KEGG_ENDOCYTOSIS                                                | 176 | 0.49 | 1.34 | 0.018 | 0.227 |
| 30 | KEGG_ARRHYTHMOGENIC_RIGHT_VENTRICULAR_CARDIOMYOPATHY_ARVC       | 73  | 0.54 | 1.33 | 0.044 | 0.232 |
| 31 | KEGG_ALLOGRAFT_REJECTION                                        | 31  | 0.62 | 1.33 | 0.078 | 0.227 |
| 32 | KEGG_DORSO_VENTRAL_AXIS_FORMATION                               | 24  | 0.64 | 1.33 | 0.092 | 0.221 |
| 33 | KEGG_VEGF_SIGNALING_PATHWAY                                     | 73  | 0.54 | 1.33 | 0.051 | 0.217 |
| 34 | KEGG_CALCIIUM_SIGNALING_PATHWAY                                 | 175 | 0.49 | 1.32 | 0.02  | 0.227 |
| 35 | KEGG_REGULATION_OF_ACTIN_CYTOSKELETON                           | 211 | 0.48 | 1.32 | 0.017 | 0.227 |
| 36 | KEGG_EPITHELIAL_CELL_SIGNALING_IN_HELICOBACTER_PYLORI_INFECTION | 68  | 0.54 | 1.31 | 0.064 | 0.227 |
| 37 | KEGG_CHEMOKINE_SIGNALING_PATHWAY                                | 186 | 0.48 | 1.31 | 0.015 | 0.22  |
| 38 | KEGG_GLYCOSAMINOGLYCAN_DEGRADATION                              | 21  | 0.64 | 1.3  | 0.117 | 0.236 |

|    | Gene<br>Symble | RANK IN<br>GENE<br>LIST | RUNNING<br>ES |
|----|----------------|-------------------------|---------------|
| 1  | <i>FN1</i>     | 5                       | 0.0579        |
| 2  | <i>COL5A1</i>  | 59                      | 0.0891        |
| 3  | <i>BIRC3</i>   | 63                      | 0.1226        |
| 4  | <i>LAMA3</i>   | 78                      | 0.1531        |
| 5  | <i>LAMB3</i>   | 186                     | 0.1709        |
| 6  | <i>FLNC</i>    | 245                     | 0.189         |
| 7  | <i>ITGAV</i>   | 316                     | 0.2043        |
| 8  | <i>PDGFD</i>   | 323                     | 0.2229        |
| 9  | <i>THBS1</i>   | 338                     | 0.2407        |
| 10 | <i>COL4A4</i>  | 342                     | 0.259         |
| 11 | <i>FYN</i>     | 359                     | 0.2764        |
| 12 | <i>COL4A6</i>  | 368                     | 0.294         |
| 13 | <i>JUN</i>     | 456                     | 0.3058        |
| 14 | <i>LAMC1</i>   | 472                     | 0.3211        |
| 15 | <i>THBS3</i>   | 502                     | 0.3351        |
| 16 | <i>BCAR1</i>   | 565                     | 0.3466        |
| 17 | <i>DOCK1</i>   | 609                     | 0.3586        |
| 18 | <i>LAMB2</i>   | 657                     | 0.3699        |
| 19 | <i>ACTN4</i>   | 688                     | 0.3816        |
| 20 | <i>LAMC2</i>   | 704                     | 0.394         |
| 21 | <i>PDGFA</i>   | 734                     | 0.4055        |
| 22 | <i>PDGFB</i>   | 998                     | 0.403         |
| 23 | <i>LAMA5</i>   | 1005                    | 0.4136        |
| 24 | <i>PIK3CD</i>  | 1089                    | 0.4199        |
| 25 | <i>DIAPH1</i>  | 1115                    | 0.429         |
| 26 | <i>COL1A1</i>  | 1141                    | 0.438         |



|    |               |      |        |
|----|---------------|------|--------|
| 27 | <i>COL6A2</i> | 1172 | 0.4466 |
| 28 | <i>RELN</i>   | 1181 | 0.4562 |
| 29 | <i>FLNA</i>   | 1192 | 0.4657 |
| 30 | <i>EGFR</i>   | 1527 | 0.4571 |
| 31 | <i>VAV1</i>   | 1558 | 0.464  |
| 32 | <i>TLN1</i>   | 1625 | 0.4688 |
| 33 | <i>FLNB</i>   | 1765 | 0.4694 |
| 34 | <i>MYL7</i>   | 1800 | 0.4752 |
| 35 | <i>SHC2</i>   | 1825 | 0.4815 |
| 36 | <i>TNXB</i>   | 1940 | 0.4829 |
| 37 | <i>ITGB1</i>  | 1984 | 0.4877 |
| 38 | <i>PARVA</i>  | 1998 | 0.4941 |
| 39 | <i>BIRC2</i>  | 2153 | 0.4928 |
| 40 | <i>ELK1</i>   | 2201 | 0.4968 |
| 41 | <i>VASP</i>   | 2240 | 0.5013 |
| 42 | <i>VAV2</i>   | 2392 | 0.4996 |
| 43 | <i>GSK3B</i>  | 2459 | 0.5021 |
| 44 | <i>CAV1</i>   | 2627 | 0.4992 |
| 45 | <i>PAK2</i>   | 2637 | 0.5043 |
| 46 | <i>PXN</i>    | 2773 | 0.5026 |
| 47 | <i>MET</i>    | 2790 | 0.5071 |
| 48 | <i>ERBB2</i>  | 2883 | 0.5074 |
| 49 | <i>ITGB6</i>  | 2928 | 0.5102 |
| 50 | <i>GRB2</i>   | 2968 | 0.5131 |
| 51 | <i>CDC42</i>  | 3042 | 0.5141 |
| 52 | <i>PDGFC</i>  | 3104 | 0.5156 |
| 53 | <i>PRKCA</i>  | 3109 | 0.5201 |
| 54 | <i>MYL9</i>   | 3167 | 0.5218 |
| 55 | <i>IGF1R</i>  | 3290 | 0.5198 |
| 56 | <i>SRC</i>    | 3303 | 0.5236 |

|           |   |     |     |     |      |      |     |     |      |      |      |
|-----------|---|-----|-----|-----|------|------|-----|-----|------|------|------|
| gefitinib | 0 | 200 | 0   | 0   | 0    | 0    | 200 | 200 | 200  | 200  |      |
| MG132     | 0 | 0   | 100 | 500 | 1000 | 2000 | 100 | 500 | 1000 | 2000 | (nM) |

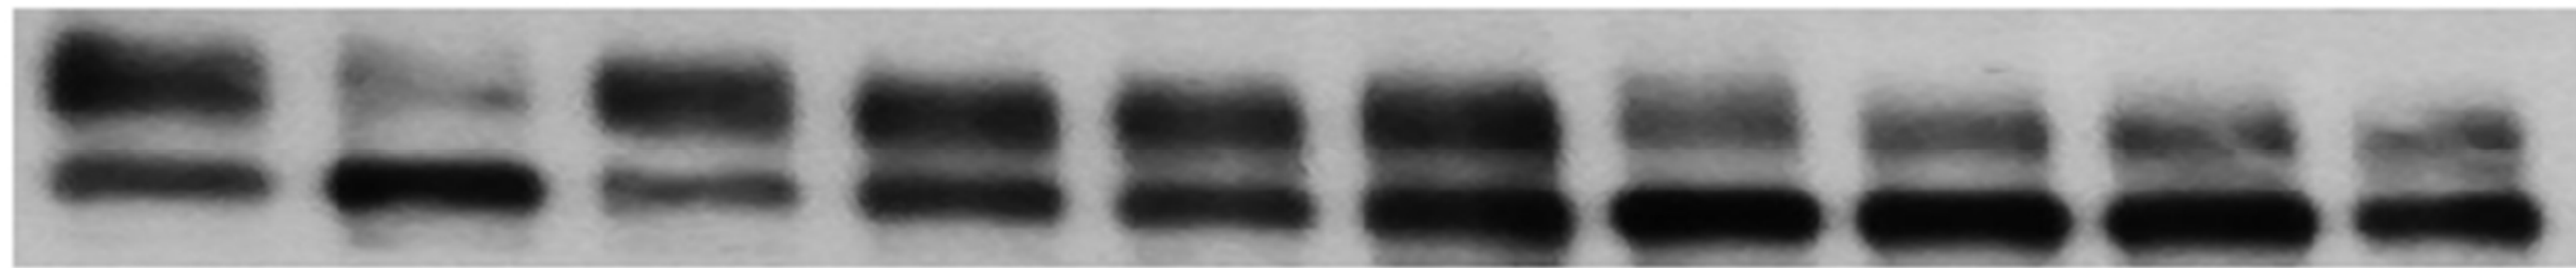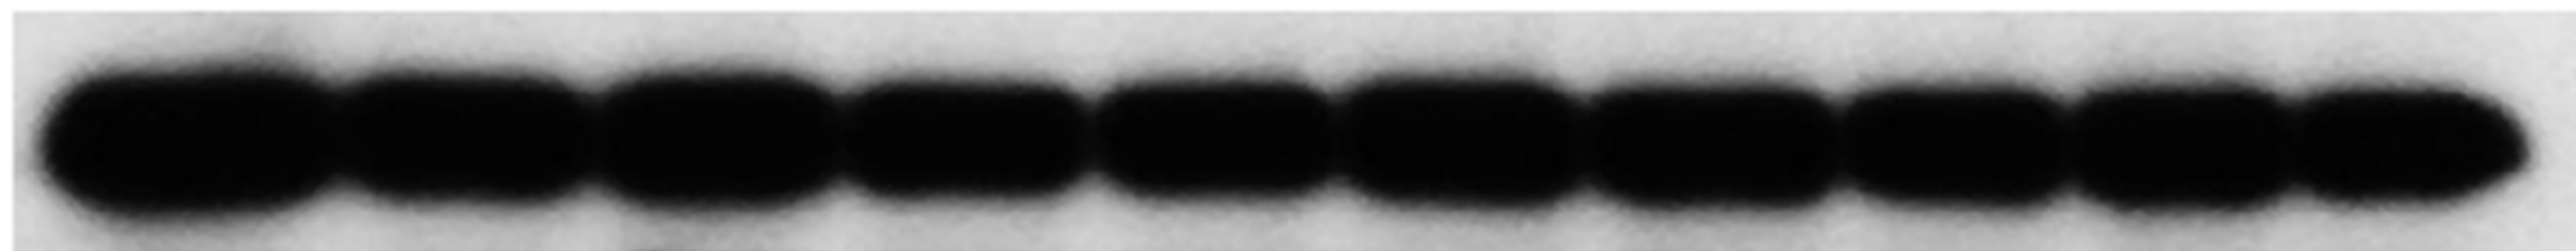

Cell viability  
(% of control)

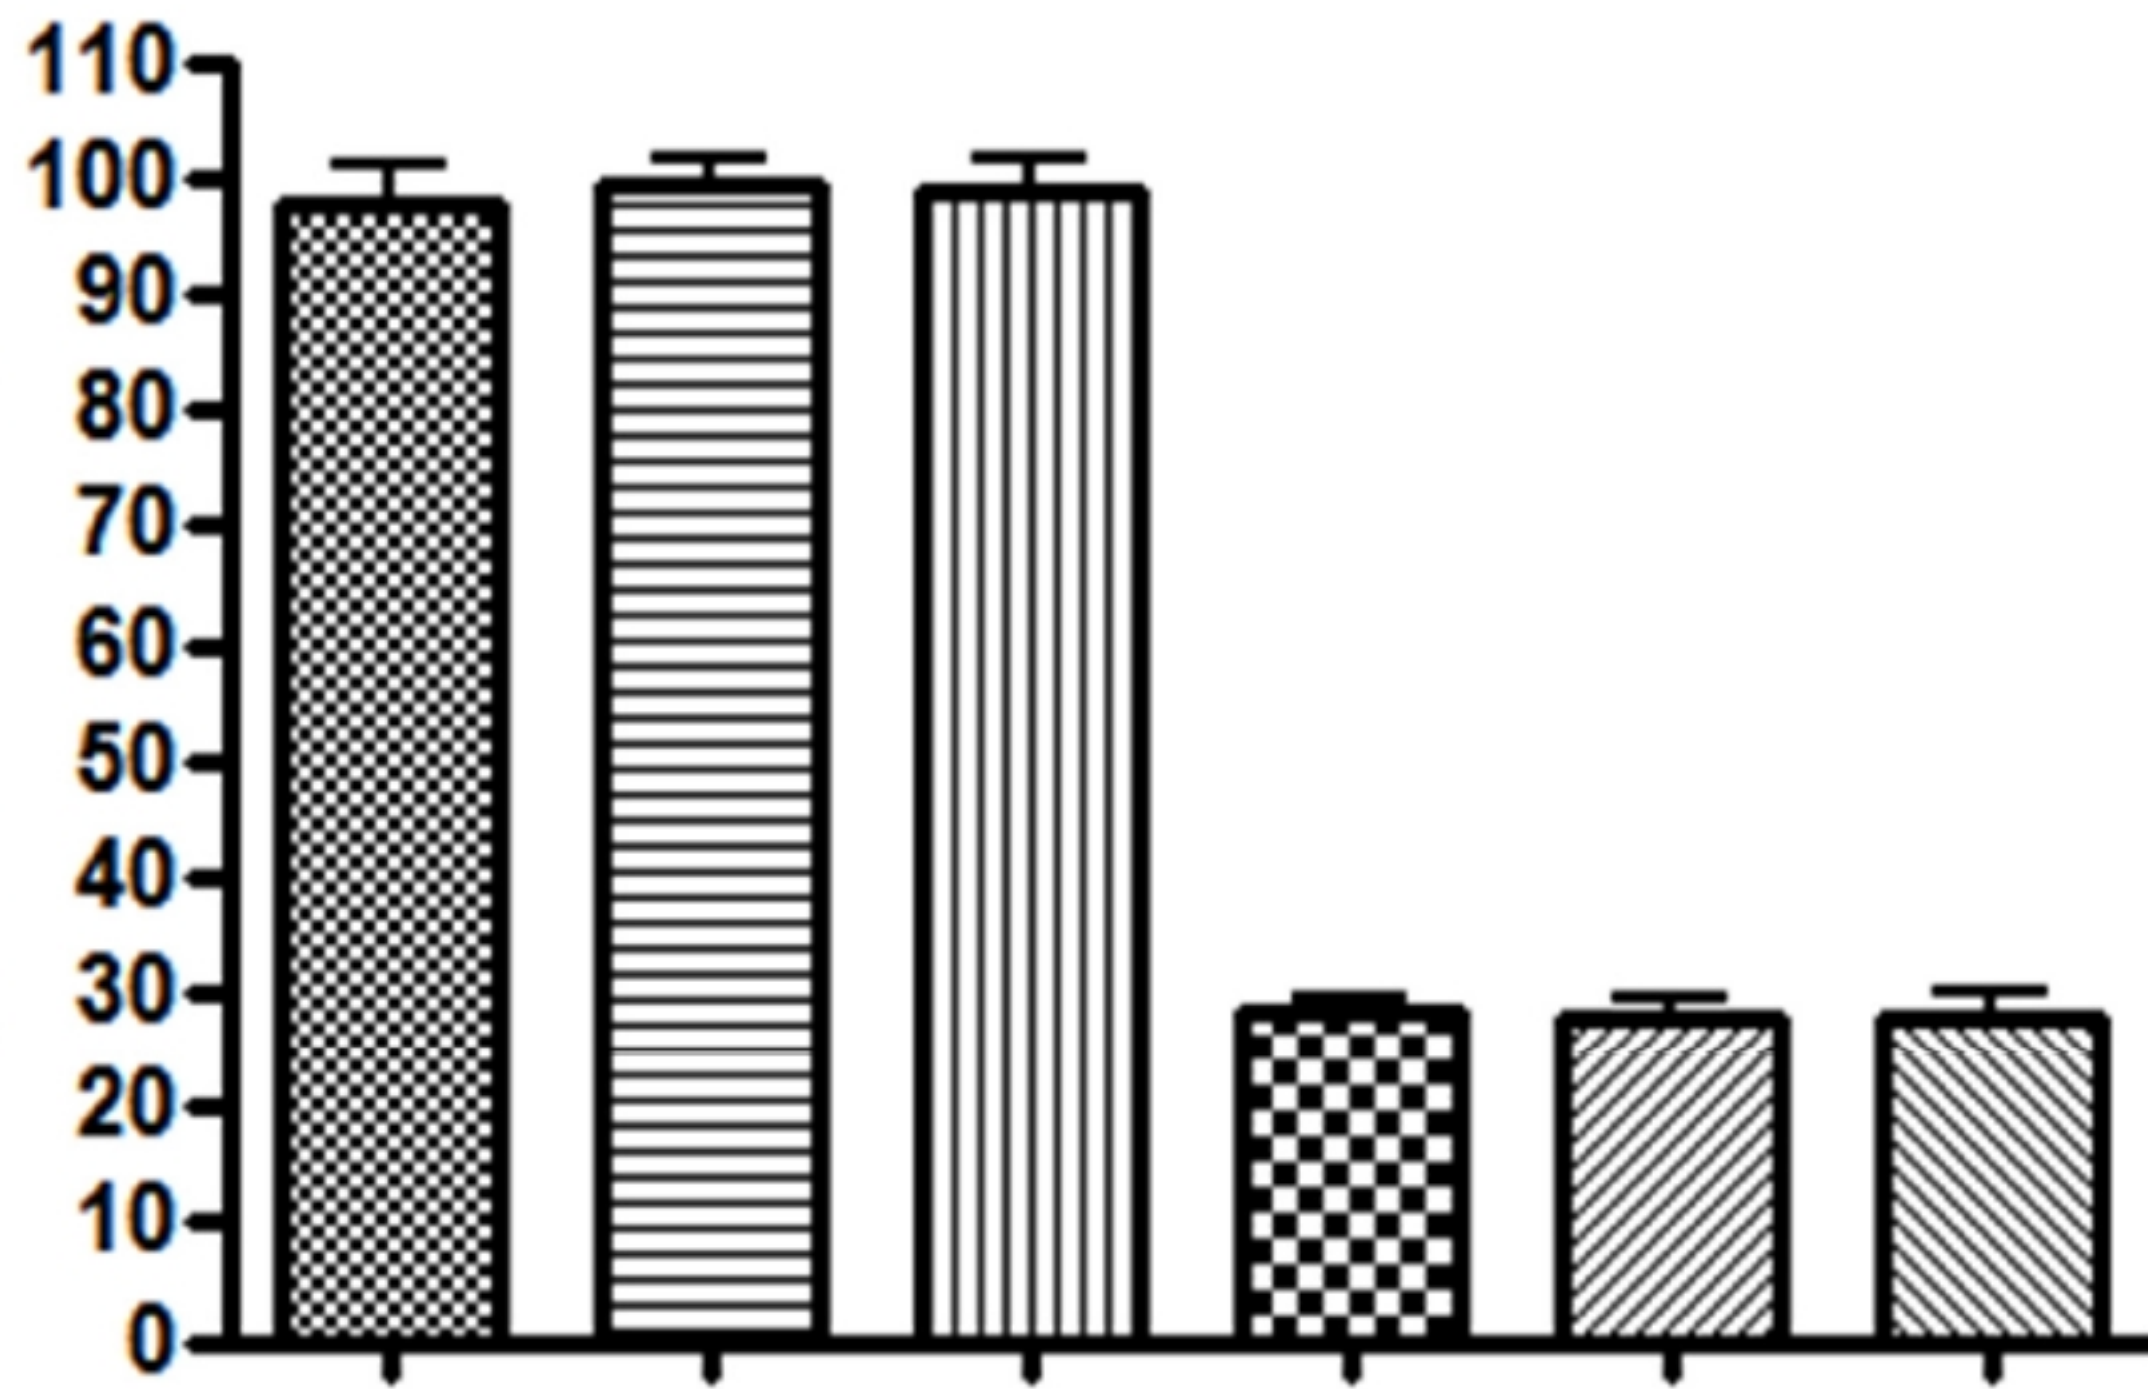

VC  
imat 100  
imat 500  
gefi  
gefi + imat 100  
gefi + imat 500

Drug treatment
